# Supplementary material for: Role of Sex on the Genetic Susceptibility to Childhood Asthma in Latinos and African Americans
Source: MDPI journal article supplement (doi:10.3390/jpm11111140), 2021-11-03
Supplement: s1 [file s1]

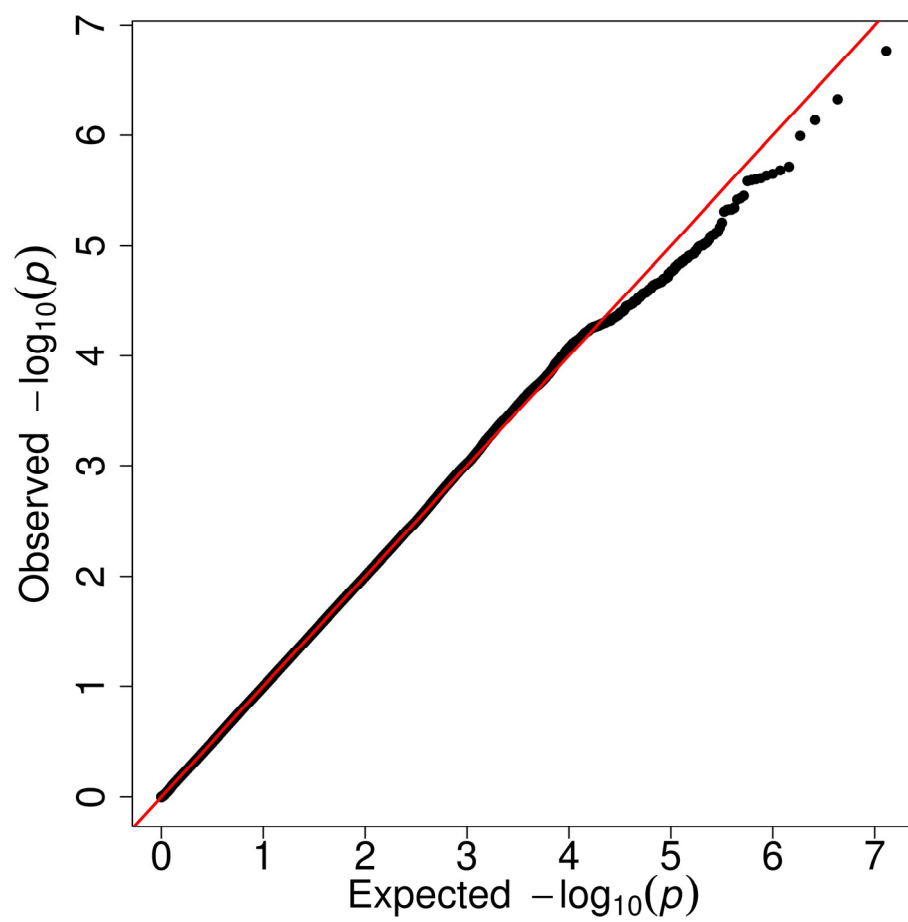

**Figure S1.** Q-Q plot of  $p$ -values after excluding variants in chromosome 17 to assess the source of genomic inflation observed in the whole GWAS.
