# Supplementary material for: Role of Sex on the Genetic Susceptibility to Childhood Asthma in Latinos and African Americans
Source: J Pers Med. 2021 Nov 3;11(11):1140. doi: 10.3390/jpm11111140 (PMC8625344; doi:10.3390/jpm11111140)
Supplement: Supplementary file 1 [file jpm-11-01140-s001.zip › 2_Supplementary_materials_Espuela-Ortiz_et_al_GWAS_sex_asthma_JPM.xlsx]

## Sheet: Table_S1
Table S1. Summary of the suggestive variants identified in interaction analysis (p <= 1.9 x 10-6), and their association results among females and males.
rsID	Chr:pos a	Band	A1/A2 b	Closest gene	OR (95% CI)interaction	β interaction	SE interaction	p interaction	OR (95% CI)female	β female	SE female	p female	OR (95% CI)male	β male	SE male	p male	Q interaction	p Q interaction	Q female	p Qfemale	Qmale	Q pmale	I2interaction	I2female	I2male	TAU2interaction	TAU2female	TAU2male
rs4954712	2:139216814	q22.1	G/A	AC114763.1	0.59 (0.48 - 0.72)	-0.524531	0.103264	4.55893e-07	0.79 (0.68 - 0.91)	-0.239051	0.0725102	0.00116846	1.35 (1.16 - 1.57)	0.302084	0.0773985	0.000114605	0.0147459	0.903348	0.594851	0.440549	0.57037	0.450112	0	0	0	0	0	0
rs4954930	2:139217127	q22.1	C/T	AC114763.1	0.59 (0.48 - 0.72)	-0.524382	0.103224	4.54643e-07	0.79 (0.68 - 0.91)	-0.239032	0.0724781	0.00116345	1.35 (1.16 - 1.57)	0.30194	0.0773705	0.000114817	0.014771	0.903267	0.59211	0.441604	0.567961	0.45107	0	0	0	0	0	0
rs146406602	2:139218399	q22.1	CA7/C	AC114763.1	0.56 (0.45 - 0.70)	-0.576241	0.109611	1.76147e-07	0.76 (0.63 - 0.92)	-0.271968	0.0959627	0.000609011	1.39 (1.19 - 1.64)	0.331309	0.0819719	6.4151e-05	0.127151	0.721405	1.53826	0.214877	0.240251	0.624025	0	34.9915	0	0	0.00648744	0
rs4954714	2:139220520	q22.1	G/A	AC114763.1	0.59 (0.49 - 0.73)	-0.52175	0.102647	4.47641e-07	0.79 (0.68 - 0.91)	-0.23864	0.0720232	0.00110174	1.35 (1.16 - 1.57)	0.299434	0.0769575	0.000120451	0.0159805	0.899404	0.54777	0.45923	0.534563	0.464695	0	0	0	0	0	0
rs7582982	2:139221447	q22.1	A/T	AC114763.1	0.59 (0.49 - 0.73)	-0.521125	0.102534	4.48855e-07	0.79 (0.68 - 0.91)	-0.238538	0.0719352	0.00109144	1.35 (1.16 - 1.57)	0.298858	0.0768766	0.000122149	0.0159993	0.899345	0.539987	0.462438	0.5271	0.467829	0	0	0	0	0	0
rs35534743	2:139226506	q22.1	C2T/C	AC114763.1	0.60 (0.49 - 0.73)	-0.518311	0.101872	4.36131e-07	0.79 (0.69 - 0.91)	-0.238283	0.0714225	0.0010153	1.34 (1.16 - 1.56)	0.295928	0.0763914	0.000129216	0.0188045	0.890928	0.500405	0.479322	0.509611	0.475307	0	0	0	0	0	0
rs7602288	2:139227224	q22.1	T/A	AC114763.1	0.60 (0.49 - 0.73)	-0.518343	0.101838	4.31659e-07	0.79 (0.68 - 0.91)	-0.238579	0.0713996	0.000996531	1.34 (1.16 - 1.56)	0.295612	0.0763601	0.000130576	0.0193094	0.889483	0.50566	0.477023	0.518112	0.471648	0	0	0	0	0	0
rs11679971	2:139231093	q22.1	A/G	AC114763.1	0.59 (0.49 - 0.73)	-0.519971	0.101699	3.84607e-07	0.79 (0.68 - 0.91)	-0.239272	0.0713491	0.000954278	1.34 (1.16 - 1.56)	0.296072	0.0761676	0.000122344	0.0194315	0.889136	0.503655	0.477899	0.522122	0.469938	0	0	0	0	0	0
rs73021932	6:158513756	q25.3	T/C	SYNJ2	0.55 (0.29 - 1.08)	-0.589598	0.337741	1.72301e-06	0.70 (0.51 - 0.98)	-0.349614	0.166555	1.47794e-05	1.26 (0.91 - 1.73)	0.228848	0.162724	0.024839	8.62488	0.00331603	4.83205	0.0279354	3.57254	0.0587423	88.4056	79.3048	72.0087	0.202154	0.0442166	0.038813
rs12539647	7:46170582	p12.3	C/T	AC023669.2	0.70 (0.60 - 0.81)	-0.359836	0.074228	1.53129e-06	0.82 (0.74 - 0.91)	-0.199064	0.0544752	0.00031009	1.18 (1.05 - 1.32)	0.162459	0.0579903	0.00601432	0.0601258	0.806297	0.240967	0.623509	0.000638155	0.979846	0	0	0	0	0	0
rs6036804	20:24433071	p11.21	C/A	GAPDHP53	0.63 (0.39 - 1.01)	-0.463098	0.240732	8.48705e-07	0.86 (0.77 - 0.95)	-0.154323	0.0547683	0.00572016	1.36 (0.90 - 2.04)	0.304797	0.209304	2.42672e-05	7.47178	0.00626737	0.358624	0.549271	9.94145	0.00161599	86.6163	0	89.9411	0.10072	0	0.07897
rs6114734	20:24439248	p11.21	T/G	GAPDHP53 / SYNDIG1	1.57 (0.92 - 2.68)	0.448102	0.273693	1.25671e-06	1.22 (1.04 - 1.41)	0.194941	0.0776045	0.000817219	0.77 (0.53 - 1.12)	-0.258609	0.18891	0.000325996	10.1925	0.0014101	1.87772	0.170593	8.63593	0.00329597	90.1889	46.744	88.4205	0.135409	0.00591619	0.0633228
rs61548213	20:24449440	p11.21	A/T	SYNDIG1	1.60 (0.97 - 2.65)	0.468777	0.257116	9.40251e-07	1.23 (1.07 - 1.41)	0.209075	0.070062	0.000333206	0.77 (0.54 - 1.09)	-0.260199	0.178469	0.000514356	8.34402	0.00386958	1.46638	0.225918	7.18908	0.00733487	88.0154	31.8047	86.09	0.116748	0.00339866	0.055108
A1: effect allele; A2: non-effect allele; Chr: chromosome; CI: confidence interval; OR: odds ratio; pos: position; p: p-value; Q: Cochran's Q ; SE: standard error
Statistically significant associations are highlighted in bold.
a Coordinates are referred to the GRCh37 reference genome.
b Subindexes refers to the repetition of a particular nucleotide in the specified allele.

## Sheet: Table_S2
Table S2. Summary of suggestive variants identified among females (p <= 1.9 x 10-6), their association results among males, and in the interaction analyses.
rsID	Chr:posa	Band	A1/A2 b	Closest gene	OR (95% CI)female	β female	SE female	p female	OR (95% CI)male	β male	SE male	p male	OR (95% CI)interaction	β interaction	SE interaction	p interaction	Q female	p Qfemale	Qmale	Q pmale	Q interaction	p Q interaction	I2female	I2male	I2interaction	TAU2female	TAU2male	TAU2interaction
rs72683967	8:117337397	q23.3	G/A	LINC00536	0.66 (0.49 - 0.89)	-0.415996	0.149932	4.69669e-07	1.05 (0.89 - 1.23)	0.0450783	0.0820332	0.617798	0.62 (0.40 - 0.97)	-0.47216	0.225352	0.000143357	3.51915	0.0606637	0.458706	0.498229	3.71202	0.0540219	71.584	0	73.0605	0.0322687	0	0.0745565
rs13297369	9:22839084	p21.3	C/T	AL391117.1	0.75 (0.67 - 0.84)	-0.290577	0.0582176	7.28989e-07	0.97 (0.86 - 1.09)	-0.0355029	0.060624	0.593957	0.77 (0.66 - 0.89)	-0.267623	0.0792677	0.000879402	0.00131864	0.971033	0.208008	0.648333	0.0254007	0.873373	0	0	0	0	0	0
rs4400476	9:22862535	p21.3	T/G	AL391117.1	0.78 (0.60 - 1.00)	-0.254268	0.127601	1.70779e-07	1.05 (0.91 - 1.21)	0.0468947	0.0717091	0.554108	0.70 (0.60 - 0.82)	-0.354364	0.0797619	1.08241e-05	4.48827	0.0341282	1.3326	0.248343	0.438587	0.507805	77.7197	24.9589	0	0.0254839	0.0029383	0
rs13297845	9:22862721	p21.3	A/G	AL391117.1	0.75 (0.67 - 0.84)	-0.283312	0.0574922	1.0157e-06	0.99 (0.88 - 1.12)	-0.00648157	0.0599435	0.944592	0.75 (0.64 - 0.87)	-0.291279	0.0793944	0.000293005	0.0312281	0.859733	0.158254	0.690769	0.00011507	0.991441	0	0	0	0	0	0
rs3809717	17:37886986	q12	A/C	MIEN1	0.72 (0.57 - 0.90)	-0.331142	0.114611	1.47302e-06	0.77 (0.67 - 0.89)	-0.259714	0.0754253	0.00068836	0.96 (0.66 - 1.40)	-0.0375153	0.192303	0.338017	1.54779	0.213461	0.304568	0.581033	1.87427	0.170986	35.3919	0	46.646	0.0115894	0	0.0404962
rs4795393	17:37893484	q12	T/C	GRB7	0.78 (0.60 - 1.02)	-0.247494	0.13814	1.43039e-07	0.87 (0.77 - 0.97)	-0.142484	0.0594892	0.0194347	0.86 (0.72 - 1.03)	-0.149672	0.0920909	0.0625285	4.18374	0.0408134	0.333998	0.563314	1.14677	0.284225	76.098	0	12.7989	0.0295157	0	0.00284386
rs150443878	17:37902887	q12	G/(GA5)2GA	GRB7	0.67 (0.59 - 0.78)	-0.393335	0.0718724	2.03234e-10	0.81 (0.70 - 0.93)	-0.212195	0.0724752	0.00058917	0.83 (0.70 - 0.99)	-0.184572	0.0879991	0.0416588	1.19986	0.27335	1.17467	0.278444	0.00256731	0.95959	16.6568	14.8695	0	0.00210934	0.00203757	0
rs9747973	17:37905107	q12	T/C	GRB7	1.25 (0.98 - 1.60)	0.223845	0.126602	1.54175e-06	1.09 (0.77 - 1.55)	0.0872301	0.180129	0.00143608	1.11 (0.95 - 1.30)	0.105995	0.0793082	0.203291	4.22266	0.0398876	7.27596	0.00698834	0.4677	0.494047	76.3182	86.2561	0	0.0247327	0.0562376	0
rs11078921	17:37908867	q12	A/C	GRB7/IKZF3	0.75 (0.54 - 1.03)	-0.292962	0.163931	4.33357e-07	0.81 (0.70 - 0.93)	-0.216748	0.0739326	0.00399748	0.95 (0.61 - 1.47)	-0.0532454	0.223118	0.151974	2.94731	0.0860205	0.238006	0.62565	2.53563	0.111302	66.0708	0	60.5621	0.0374795	0	0.0654563
rs2941522	17:37910368	q12	T/C	IKZF3	1.24 (0.94 - 1.64)	0.215463	0.141524	1.06226e-06	1.08 (0.73 - 1.58)	0.0733326	0.19756	0.000853909	1.12 (0.96 - 1.30)	0.110783	0.0786703	0.178969	5.40408	0.0200898	8.91124	0.00283421	0.514039	0.473396	81.4954	88.7782	0	0.03285	0.0695164	0
rs12946510	17:37912377	q12	T/C	IKZF3	0.69 (0.58 - 0.81)	-0.371674	0.0839242	3.47469e-10	0.81 (0.68 - 0.97)	-0.207968	0.0922737	0.000233887	0.85 (0.72 - 1.01)	-0.16124	0.0864439	0.0713887	1.54232	0.214273	1.67215	0.195971	3.02949e-05	0.995608	35.1625	40.1968	0	0.00559958	0.00778196	0
rs35833706	17:37916390	q12	AT/A	IKZF3	1.25 (0.96 - 1.63)	0.220721	0.135652	9.79256e-07	1.24 (1.11 - 1.38)	0.211628	0.0569284	0.000242222	1.06 (0.91 - 1.24)	0.0580112	0.0784038	0.495046	5.12804	0.0235422	0.588377	0.443047	0.783346	0.37612	80.4994	0	0	0.0298121	0	0
rs907092	17:37922259	q12	A/G	IKZF3	0.69 (0.54 - 0.89)	-0.36592	0.127933	5.84934e-11	0.83 (0.67 - 1.02)	-0.189241	0.107061	0.00045067	0.82 (0.69 - 0.97)	-0.199836	0.0881419	0.0272389	2.92479	0.0872285	1.88609	0.169643	0.0667779	0.796087	65.8095	46.9804	0	0.0223905	0.0122287	0
rs2313430	17:37929816	q12	C/T	IKZF3	1.27 (1.03 - 1.57)	0.241139	0.106679	8.08906e-07	1.14 (0.88 - 1.48)	0.132614	0.131721	0.00132542	1.10 (0.94 - 1.28)	0.0954713	0.0776817	0.244036	3.20206	0.0735454	4.13273	0.0420614	0.187777	0.664773	68.7701	75.8029	0	0.0159165	0.0266777	0
rs10445308	17:37938047	q12	T/C	IKZF3	0.69 (0.59 - 0.80)	-0.375113	0.0792202	1.78581e-10	0.82 (0.72 - 0.92)	-0.203959	0.0634029	0.000928796	0.83 (0.70 - 0.98)	-0.18553	0.0851786	0.0341528	1.44461	0.229394	1.03746	0.308412	0.026569	0.870518	30.7773	3.61095	0	0.00444168	0.000422169	0
rs12942330	17:37939839	q12	T/C	IKZF3	0.69 (0.59 - 0.80)	-0.374988	0.0793568	1.81869e-10	0.82 (0.72 - 0.93)	-0.203497	0.0641925	0.000927509	0.83 (0.70 - 0.98)	-0.185443	0.0852077	0.0343043	1.44773	0.228892	1.05074	0.305337	0.0253489	0.873501	30.9264	4.82869	0	0.00447565	0.000572262	0
rs11658993	17:37940808	q12	T/C	IKZF3	0.69 (0.60 - 0.80)	-0.371288	0.0737705	4.90611e-10	0.81 (0.70 - 0.94)	-0.2124	0.0764654	0.000320981	0.85 (0.72 - 1.01)	-0.161231	0.0854932	0.068186	1.29232	0.25562	1.29216	0.255651	0.00123068	0.972015	22.6199	22.61	0	0.00293665	0.00330914	0
rs2952144	17:37960017	q12	T/C	IKZF3	1.25 (0.97 - 1.61)	0.22584	0.12841	8.5964e-07	1.12 (0.86 - 1.47)	0.116167	0.136849	0.00252591	1.11 (0.95 - 1.29)	0.104995	0.0776251	0.19764	4.57604	0.0324221	4.44184	0.0350685	0.0616902	0.803844	78.147	77.4868	0	0.0259858	0.029387	0
rs4795395	17:37962987	q12	A/T	IKZF3	0.69 (0.58 - 0.81)	-0.374313	0.0850354	1.44476e-10	0.82 (0.72 - 0.93)	-0.203908	0.0657011	0.000859995	0.83 (0.70 - 0.98)	-0.188147	0.0853833	0.0320414	1.61016	0.204469	1.07636	0.299513	0.0385166	0.844409	37.8944	7.09424	0	0.00611633	0.000863516	0
rs9909593	17:37970149	q12	G/A	IKZF3	0.69 (0.58 - 0.81)	-0.372996	0.0851353	1.54186e-10	0.82 (0.72 - 0.93)	-0.20186	0.0675469	0.000880673	0.83 (0.70 - 0.98)	-0.187756	0.0852719	0.0321793	1.61702	0.203508	1.11173	0.291707	0.034636	0.85236	38.1577	10.0498	0	0.0061674	0.00126077	0
rs113897057	17:37975214	q12	CT2CTA/C	IKZF3	0.80 (0.63 - 1.03)	-0.220169	0.125654	1.60679e-06	0.89 (0.67 - 1.18)	-0.112852	0.144128	0.0020776	0.91 (0.78 - 1.06)	-0.0973621	0.0774639	0.232977	4.42013	0.0355174	4.95904	0.0259546	0.124508	0.724196	77.3762	79.8348	0	0.0246498	0.0334936	0
rs9303277	17:37976469	q12	T/C	IKZF3	0.81 (0.62 - 1.05)	-0.213991	0.13173	1.82859e-06	0.90 (0.68 - 1.18)	-0.110118	0.141833	0.00265908	0.91 (0.78 - 1.05)	-0.0987029	0.0773573	0.225612	4.86724	0.0273712	4.82017	0.0281286	0.0676352	0.794812	79.4545	79.2538	0	0.0277751	0.032219	0
rs12944882	17:37983492	q12	C/T	IKZF3	0.78 (0.64 - 0.94)	-0.253592	0.0996166	2.99171e-07	0.87 (0.68 - 1.12)	-0.134759	0.127481	0.00145113	0.90 (0.78 - 1.05)	-0.100971	0.0774264	0.215021	2.76033	0.0966281	3.85529	0.0495894	0.234435	0.628254	63.7725	74.0616	0	0.0129833	0.0244716	0
rs3816470	17:37985801	q12	G/A	IKZF3	0.77 (0.64 - 0.93)	-0.257	0.0964305	2.52892e-07	0.87 (0.68 - 1.12)	-0.133647	0.127974	0.00148644	0.90 (0.78 - 1.05)	-0.103073	0.077358	0.204747	2.59466	0.107225	3.89849	0.0483295	0.274461	0.600355	61.4593	74.349	0	0.0117666	0.0247466	0
rs34233420	17:38004929	q12	G/GAT3	IKZF3	0.68 (0.59 - 0.80)	-0.379253	0.0779152	1.39864e-10	0.82 (0.71 - 0.95)	-0.19543	0.072016	0.00106282	0.82 (0.70 - 0.97)	-0.193026	0.0853537	0.0276442	1.41176	0.234765	1.20057	0.273207	0.00975732	0.921314	29.1664	16.7065	0	0.00407964	0.00225597	0
rs9916765	17:38005595	q12	C/T	IKZF3	0.81 (0.62 - 1.04)	-0.215686	0.132354	1.67218e-06	0.91 (0.67 - 1.25)	-0.0915059	0.161443	0.00264342	0.90 (0.77 - 1.04)	-0.108633	0.0776864	0.182179	4.86248	0.0274468	6.2038	0.0127476	0.216914	0.641401	79.4344	83.8808	0	0.0280344	0.0439946	0
rs202126107	17:38006767	q12	G/GC(AT)2(TA)2	IKZF3	0.77 (0.59 - 0.99)	-0.266359	0.132756	3.2357e-08	0.93 (0.68 - 1.28)	-0.0680568	0.161693	0.00987827	0.83 (0.71 - 0.97)	-0.181254	0.079105	0.025589	4.79953	0.0284674	6.22626	0.0125869	0.202801	0.65247	79.1646	83.939	0	0.0280907	0.0441379	0
rs35564481	17:38020058	q12	AC/A	IKZF3	0.80 (0.61 - 1.06)	-0.216969	0.139366	8.33643e-07	0.92 (0.68 - 1.24)	-0.0882302	0.155013	0.00421241	0.89 (0.76 - 1.03)	-0.118757	0.0774032	0.141486	5.39557	0.020188	5.76618	0.0163375	0.103576	0.74758	81.4663	82.6575	0	0.0318373	0.0400089	0
rs1453559	17:38020419	q12	C/T	IKZF3	0.79 (0.63 - 0.98)	-0.240557	0.11159	5.88021e-07	0.91 (0.68 - 1.21)	-0.0990966	0.146742	0.00374817	0.89 (0.76 - 1.03)	-0.121347	0.077382	0.132504	3.49056	0.0617197	5.1727	0.0229446	0.307598	0.579158	71.3513	80.6677	0	0.0180269	0.0350515	0
rs4795397	17:38023745	q12	G/A	ZPBP2	0.70 (0.58 - 0.83)	-0.362962	0.0889785	2.50645e-10	0.84 (0.70 - 0.99)	-0.179016	0.087635	0.00115907	0.83 (0.70 - 0.98)	-0.188176	0.0844797	0.030158	1.79198	0.180685	1.64274	0.19995	0.00495397	0.943888	44.1958	39.126	0	0.00758682	0.00678666	0
rs11557466	17:38024626	q12	T/C	ZPBP2	0.73 (0.53 - 1.01)	-0.309298	0.164285	9.12209e-10	0.80 (0.70 - 0.90)	-0.229264	0.0630349	0.000331302	0.86 (0.70 - 1.06)	-0.150026	0.106768	0.0723167	4.5013	0.033869	0.444712	0.504857	1.22131	0.269104	77.7842	0	18.1206	0.0427345	0	0.00554426
rs11078925	17:38025208	q12	C/T	ZPBP2	0.73 (0.53 - 1.01)	-0.309223	0.164165	9.31094e-10	0.80 (0.70 - 0.90)	-0.229389	0.0630391	0.000329083	0.86 (0.70 - 1.06)	-0.150164	0.106249	0.0728228	4.49441	0.0340058	0.448786	0.502912	1.21418	0.270506	77.7502	0	17.64	0.042656	0	0.00536656
rs200306858	17:38025643	q12	T3C2/T	ZPBP2	0.81 (0.53 - 1.23)	-0.213974	0.213121	2.96194e-07	0.90 (0.67 - 1.21)	-0.102507	0.148871	0.00942182	0.86 (0.73 - 1.03)	-0.145852	0.0871011	0.107152	10.2352	0.00137782	4.42537	0.0354084	0.514457	0.473216	90.2298	77.403	0	0.0820805	0.0347197	0
rs34120102	17:38026035	q12	A/G	ZPBP2	0.73 (0.54 - 0.99)	-0.318172	0.15613	1.00796e-09	0.79 (0.70 - 0.90)	-0.234511	0.0633584	0.000258084	0.86 (0.71 - 1.04)	-0.153649	0.0995097	0.0786937	3.88126	0.048828	0.394378	0.530007	1.11488	0.291024	74.2351	0	10.304	0.0371216	0	0.00300137
rs11655198	17:38026169	q12	T/C	ZPBP2	0.83 (0.58 - 1.19)	-0.184923	0.185039	1.01423e-06	0.83 (0.72 - 0.96)	-0.185272	0.0752178	0.000794868	0.94 (0.78 - 1.15)	-0.0571736	0.10023	0.415494	8.15887	0.0042851	1.43644	0.230715	1.34623	0.245938	87.7434	30.3837	25.7185	0.0602921	0.00390983	0.00595628
rs11650661	17:38026286	q12	T/A	ZPBP2	0.83 (0.58 - 1.19)	-0.184981	0.184991	1.01318e-06	0.83 (0.72 - 0.96)	-0.185182	0.0753489	0.000794302	0.94 (0.78 - 1.15)	-0.0573287	0.100043	0.415319	8.15542	0.00429327	1.44048	0.230062	1.34244	0.246603	87.7382	30.5786	25.509	0.0602575	0.00394556	0.00589068
rs11655292	17:38026361	q12	G/C	ZPBP2	0.83 (0.58 - 1.19)	-0.184994	0.184977	1.01315e-06	0.83 (0.72 - 0.96)	-0.185157	0.0753931	0.000793851	0.94 (0.78 - 1.15)	-0.0573688	0.0999833	0.415329	8.15435	0.00429579	1.44185	0.229841	1.34123	0.246816	87.7366	30.6445	25.4418	0.0602469	0.00395764	0.00586969
rs12709365	17:38027400	q12	G/A	ZPBP2	0.81 (0.54 - 1.21)	-0.214172	0.205092	3.78379e-08	0.83 (0.72 - 0.94)	-0.190581	0.0673372	0.00098403	0.93 (0.72 - 1.19)	-0.0767331	0.128694	0.20944	9.86399	0.00168546	1.19977	0.273367	2.0128	0.155977	89.8621	16.6509	50.318	0.0757587	0.00180703	0.0176503
rs13380815	17:38027583	q12	G/A	ZPBP2	0.81 (0.54 - 1.21)	-0.214227	0.205044	3.78136e-08	0.83 (0.72 - 0.94)	-0.190527	0.0674195	0.000983646	0.93 (0.72 - 1.19)	-0.0768373	0.128574	0.209323	9.86049	0.00168866	1.20192	0.272939	2.00957	0.15631	89.8585	16.7997	50.2381	0.0757199	0.00182631	0.0175925
rs11557467	17:38028634	q12	T/G	ZPBP2	0.86 (0.56 - 1.30)	-0.154867	0.213572	8.73462e-07	0.83 (0.72 - 0.95)	-0.187572	0.0702062	0.000588788	0.99 (0.76 - 1.28)	-0.0116425	0.133567	0.589108	12.2175	0.000473427	1.37764	0.240503	2.40263	0.121131	91.815	27.4121	58.379	0.0838568	0.00303001	0.0215568
rs12936231	17:38029120	q12	G/C	ZPBP2	0.83 (0.59 - 1.16)	-0.189753	0.171178	9.54055e-07	0.89 (0.70 - 1.13)	-0.118505	0.123398	0.00403533	0.91 (0.78 - 1.06)	-0.0971635	0.0771854	0.232209	8.37358	0.00380714	3.83485	0.0501975	0.183191	0.668645	88.0577	73.9234	0	0.0517207	0.0228511	0
rs11870965	17:38030205	q12	A/T	ZPBP2	0.81 (0.54 - 1.20)	-0.214675	0.204568	3.77394e-08	0.83 (0.72 - 0.95)	-0.189425	0.0691166	0.000974271	0.92 (0.72 - 1.19)	-0.0781561	0.126659	0.208963	9.83026	0.00171664	1.24695	0.264136	1.95849	0.161675	89.8273	19.8044	48.9402	0.0753431	0.00223098	0.0166806
rs9903250	17:38031030	q12	A/G	ZPBP2	0.83 (0.58 - 1.20)	-0.185179	0.185486	9.33675e-07	0.83 (0.72 - 0.95)	-0.192287	0.0702948	0.000608876	0.95 (0.77 - 1.17)	-0.0494297	0.105539	0.442416	8.2858	0.00399564	1.30442	0.253407	1.46947	0.22543	87.9312	23.3376	31.9482	0.0607022	0.0026919	0.0079877
rs9905959	17:38031138	q12	G/A	ZPBP2	0.81 (0.54 - 1.21)	-0.214546	0.205186	3.69464e-08	0.83 (0.72 - 0.95)	-0.187736	0.0708744	0.00100136	0.92 (0.72 - 1.18)	-0.0791862	0.12592	0.206653	9.8812	0.00166976	1.29488	0.25515	1.9382	0.163864	89.8798	22.7729	48.4057	0.0758418	0.00266195	0.0163274
rs11658278	17:38031164	q12	C/T	ZPBP2	0.86 (0.56 - 1.33)	-0.148504	0.220108	7.38418e-07	0.84 (0.73 - 0.98)	-0.171097	0.0756739	0.00127318	0.98 (0.75 - 1.28)	-0.0195295	0.135532	0.513585	13.1605	0.000285915	1.57387	0.209646	2.498	0.113991	92.4015	36.4622	59.9679	0.0896203	0.00454608	0.0227267
rs10852935	17:38031674	q12	T/C	ZPBP2	0.73 (0.53 - 1.01)	-0.314077	0.163921	6.57271e-10	0.79 (0.70 - 0.90)	-0.231759	0.0631175	0.00028949	0.86 (0.70 - 1.05)	-0.153664	0.104818	0.0694131	4.41307	0.0356645	0.458399	0.498373	1.19018	0.275294	77.3401	0	15.9789	0.0423471	0	0.00481965
rs10852936	17:38031714	q12	T/C	ZPBP2	0.81 (0.54 - 1.21)	-0.215035	0.207495	3.1076e-08	0.83 (0.72 - 0.95)	-0.190419	0.0708282	0.000867874	0.93 (0.72 - 1.19)	-0.0766823	0.12843	0.211292	10.0891	0.00149147	1.29161	0.255752	2.00445	0.156838	90.0883	22.5771	50.111	0.0777319	0.00263622	0.0175087
rs9891174	17:38031802	q12	A/T	ZPBP2	0.79 (0.53 - 1.18)	-0.232501	0.200936	1.56596e-08	0.82 (0.73 - 0.92)	-0.201118	0.0593399	0.000838798	0.92 (0.70 - 1.22)	-0.079653	0.143902	0.163876	9.14273	0.00249708	0.675158	0.411259	2.40711	0.120785	89.0624	0	58.4564	0.0721065	0	0.0252145
rs59716545	17:38031857	q12	G/T	ZPBP2	0.73 (0.53 - 1.01)	-0.309444	0.165007	8.82999e-10	0.79 (0.70 - 0.90)	-0.232724	0.0631047	0.000271998	0.86 (0.70 - 1.06)	-0.149555	0.104102	0.0775074	4.53019	0.0333018	0.48202	0.487509	1.18412	0.276519	77.9259	0	15.5489	0.0431799	0	0.00462435
rs36095411	17:38031865	q12	G/T	ZPBP2	0.74 (0.54 - 1.01)	-0.299611	0.15927	3.16248e-09	0.79 (0.70 - 0.89)	-0.235849	0.0631595	0.000226691	0.87 (0.73 - 1.03)	-0.14425	0.0880839	0.11547	4.18246	0.0408444	0.668488	0.413579	0.913031	0.339312	76.0906	0	0	0.0394278	0	0
rs200216139	17:38032132	q12	GC/G	ZPBP2	0.83 (0.57 - 1.20)	-0.191307	0.191878	4.42385e-07	0.84 (0.74 - 0.96)	-0.174372	0.0660909	0.00258318	0.93 (0.74 - 1.17)	-0.0729254	0.115149	0.264137	8.56595	0.00342509	1.16885	0.279637	1.65446	0.198353	88.3259	14.446	39.5573	0.0652432	0.00154205	0.0115061
rs12939457	17:38032188	q12	C/T	ZPBP2	0.81 (0.54 - 1.21)	-0.214415	0.205395	3.70214e-08	0.83 (0.72 - 0.95)	-0.19062	0.0703585	0.000862438	0.93 (0.72 - 1.19)	-0.0763716	0.126517	0.21765	9.89722	0.00165529	1.2799	0.257918	1.95326	0.162236	89.8961	21.8689	48.8035	0.0760097	0.00252935	0.0166023
rs71152617	17:38032200	q12	A/AGTGCAGT	ZPBP2	0.81 (0.54 - 1.21)	-0.214426	0.205384	3.7018e-08	0.83 (0.72 - 0.95)	-0.190623	0.0703544	0.000862442	0.93 (0.72 - 1.19)	-0.0763835	0.126507	0.217627	9.8964	0.00165603	1.27978	0.257939	1.95297	0.162267	89.8953	21.8617	48.796	0.0760007	0.00252832	0.0165973
rs34189114	17:38032460	q12	T/C	ZPBP2	0.73 (0.53 - 1.01)	-0.311613	0.162498	8.51261e-10	0.79 (0.70 - 0.90)	-0.231823	0.0630553	0.000284306	0.86 (0.70 - 1.05)	-0.152893	0.101219	0.0749869	4.40607	0.0358112	0.476321	0.490093	1.14828	0.283909	77.304	0	12.9135	0.0415842	0	0.00371882
rs35736272	17:38032680	q12	C/T	ZPBP2	0.73 (0.54 - 0.98)	-0.319919	0.155037	9.30589e-10	0.79 (0.69 - 0.89)	-0.23993	0.0633437	0.000183157	0.87 (0.70 - 1.08)	-0.141109	0.109927	0.087885	3.83276	0.05026	0.278638	0.597595	1.24531	0.264451	73.9092	0	19.6984	0.0364654	0	0.00639882
rs1054609	17:38033277	q12	C/A	ZPBP2	0.81 (0.54 - 1.21)	-0.214612	0.205071	3.68777e-08	0.83 (0.72 - 0.95)	-0.189778	0.0692863	0.000945243	0.93 (0.72 - 1.19)	-0.0776107	0.127071	0.210119	9.87374	0.00167655	1.25164	0.26324	1.96969	0.160481	89.8721	20.1046	49.2306	0.0757508	0.0022729	0.0168778
rs9907088	17:38035116	q12	A/G	ZPBP2	0.80 (0.54 - 1.18)	-0.228239	0.200425	2.2333e-08	0.83 (0.70 - 0.99)	-0.183123	0.0873117	0.00077884	0.90 (0.73 - 1.11)	-0.103909	0.104351	0.172933	8.91484	0.00282862	1.72295	0.189313	1.35901	0.243709	88.7828	41.9601	26.4172	0.071535	0.00704037	0.00666694
rs36038753	17:38035370	q12	T/G	ZPBP2	0.80 (0.54 - 1.18)	-0.228157	0.200491	2.24095e-08	0.83 (0.70 - 0.99)	-0.183122	0.087382	0.000776834	0.90 (0.73 - 1.11)	-0.103818	0.10436	0.173271	8.91992	0.00282077	1.7252	0.189025	1.35914	0.243687	88.7891	42.0356	26.4238	0.071587	0.00706252	0.0066697
rs35569035	17:38035624	q12	T/C	ZPBP2	0.74 (0.53 - 1.02)	-0.305655	0.167289	1.14193e-09	0.79 (0.70 - 0.89)	-0.23723	0.0632479	0.000212258	0.88 (0.69 - 1.10)	-0.132937	0.118171	0.0899686	4.5499	0.0329207	0.346269	0.556233	1.37234	0.24141	78.0215	0	27.1319	0.0444544	0	0.00956586
rs9910826	17:38035648	q12	G/A	ZPBP2	0.80 (0.54 - 1.18)	-0.227824	0.200763	2.26934e-08	0.83 (0.70 - 0.99)	-0.183109	0.0876592	0.000769363	0.90 (0.73 - 1.11)	-0.103457	0.104409	0.174571	8.94148	0.00278767	1.73402	0.187898	1.35987	0.243559	88.8162	42.3307	26.4638	0.0718023	0.00714997	0.00668509
rs34074973	17:38035766	q12	G/(GA)2	ZPBP2	0.73 (0.53 - 1.01)	-0.311379	0.162723	8.5708e-10	0.79 (0.70 - 0.90)	-0.233249	0.0630726	0.000261366	0.86 (0.70 - 1.06)	-0.148347	0.105413	0.0776279	4.41683	0.0355862	0.429888	0.512044	1.20198	0.272926	77.3593	0	16.8042	0.0417253	0	0.00507129
rs9904624	17:38036586	q12	G/A	ZPBP2	0.80 (0.54 - 1.18)	-0.226728	0.201634	2.34599e-08	0.83 (0.70 - 0.99)	-0.183039	0.0885378	0.000746209	0.90 (0.74 - 1.11)	-0.102301	0.10458	0.178709	9.01197	0.00268218	1.76248	0.184315	1.36266	0.243077	88.9036	43.2618	26.6141	0.0724954	0.00743087	0.00674123
rs4795398	17:38038179	q12	T/C	ZPBP2	0.74 (0.53 - 1.02)	-0.305573	0.167252	1.17907e-09	0.79 (0.70 - 0.89)	-0.238806	0.0632722	0.000193314	0.87 (0.70 - 1.10)	-0.134128	0.115051	0.0929665	4.54664	0.0329833	0.381184	0.53697	1.32523	0.249655	78.0058	0	24.5415	0.0444259	0	0.00835953
rs12939565	17:38038389	q12	T/A	ZPBP2	0.82 (0.57 - 1.18)	-0.196482	0.185079	4.65712e-07	0.84 (0.69 - 1.02)	-0.173973	0.09741	0.000694958	0.92 (0.78 - 1.08)	-0.0822244	0.0818794	0.346303	7.70191	0.00551624	2.1075	0.146578	0.880812	0.347979	87.0162	52.5505	0	0.0598674	0.0106502	0
rs12939566	17:38038390	q12	T/A	ZPBP2	0.80 (0.54 - 1.19)	-0.224724	0.203171	2.45044e-08	0.83 (0.70 - 0.99)	-0.182819	0.089968	0.000710407	0.90 (0.74 - 1.11)	-0.100272	0.105007	0.185595	9.14307	0.00249662	1.81035	0.178467	1.37067	0.241696	89.0628	44.762	27.0432	0.0737303	0.00790008	0.00689406
rs62067029	17:38038391	q12	T/A	ZPBP2	0.73 (0.57 - 0.94)	-0.314654	0.126816	4.08103e-08	0.78 (0.69 - 0.89)	-0.242812	0.065672	0.000262143	0.88 (0.73 - 1.05)	-0.128688	0.0919987	0.182031	2.47068	0.115988	0.214938	0.642924	0.854908	0.355168	59.5253	0	0	0.0204169	0	0
rs71152620	17:38039561	q12	T/TA2CA	ZPBP2/GSDMB	0.86 (0.56 - 1.32)	-0.147469	0.218122	9.95197e-07	0.82 (0.72 - 0.93)	-0.196544	0.0645742	0.000390653	1.00 (0.76 - 1.33)	0.00401577	0.143681	0.671994	12.8651	0.000334764	1.21648	0.270053	2.77811	0.0955611	92.227	17.7955	64.0042	0.0878494	0.00172277	0.0271042
rs12232497	17:38040119	q12	C/T	ZPBP2/GSDMB	0.73 (0.54 - 0.98)	-0.320063	0.153903	1.02907e-09	0.78 (0.69 - 0.89)	-0.24324	0.0633347	0.000148042	0.87 (0.71 - 1.07)	-0.140771	0.105932	0.0953798	3.78103	0.0518369	0.303722	0.581559	1.1932	0.274684	73.5522	0	16.192	0.0357846	0	0.00503808
rs12232498	17:38040363	q12	C/T	ZPBP2/GSDMB	0.80 (0.54 - 1.20)	-0.2223	0.204992	2.62684e-08	0.83 (0.70 - 1.00)	-0.182271	0.0913337	0.000686576	0.91 (0.74 - 1.12)	-0.0980253	0.10584	0.19211	9.31096	0.00227787	1.85824	0.172828	1.3878	0.238777	89.26	46.1857	27.9434	0.0752168	0.00836328	0.00720968
rs12941333	17:38040534	q12	T/C	ZPBP2/GSDMB	0.80 (0.54 - 1.20)	-0.222039	0.205211	2.63281e-08	0.83 (0.70 - 1.00)	-0.182154	0.0914345	0.000688345	0.91 (0.74 - 1.12)	-0.0978152	0.105999	0.192493	9.33213	0.00225171	1.86189	0.172407	1.39109	0.238222	89.2843	46.291	28.1138	0.0753968	0.00839794	0.00726996
rs2872507	17:38040763	q12	A/G	ZPBP2/GSDMB	0.80 (0.54 - 1.20)	-0.221685	0.205514	2.64015e-08	0.83 (0.70 - 1.00)	-0.181994	0.0915751	0.0006907	0.91 (0.74 - 1.12)	-0.0975283	0.106218	0.193013	9.36183	0.00221551	1.86697	0.171822	1.39565	0.237454	89.3183	46.4374	28.3486	0.0756471	0.00844633	0.00735343
rs9908132	17:38042777	q12	A/T	ZPBP2/GSDMB	0.86 (0.56 - 1.33)	-0.14577	0.218785	1.08049e-06	0.83 (0.72 - 0.96)	-0.18723	0.0727543	0.000513362	1.00 (0.76 - 1.31)	-0.00264453	0.137629	0.643692	12.8572	0.000336188	1.46475	0.226175	2.54758	0.110463	92.2222	31.7292	60.7471	0.0883813	0.00371919	0.0237286
rs9901146	17:38043343	q12	A/G	ZPBP2/GSDMB	0.86 (0.56 - 1.33)	-0.145772	0.218808	1.07803e-06	0.83 (0.72 - 0.96)	-0.18725	0.072741	0.000512875	1.00 (0.76 - 1.31)	-0.00262036	0.137664	0.64372	12.8602	0.000335639	1.46436	0.226238	2.54892	0.11037	92.2241	31.7108	60.7676	0.0884014	0.00371586	0.023748
rs12936409	17:38043649	q12	T/C	ZPBP2/GSDMB	0.73 (0.53 - 1.00)	-0.314379	0.161717	7.71602e-10	0.79 (0.70 - 0.90)	-0.23439	0.0630854	0.000244148	0.86 (0.71 - 1.03)	-0.156439	0.0965646	0.0755123	4.30244	0.0380578	0.519528	0.471043	1.08951	0.29658	76.7574	0	8.21539	0.0409441	0	0.00226456
rs67192673	17:38044893	q12	C/CT2	ZPBP2/GSDMB	0.81 (0.56 - 1.18)	-0.205719	0.188013	1.33099e-07	0.88 (0.69 - 1.13)	-0.122394	0.126813	0.00386699	0.89 (0.76 - 1.04)	-0.118292	0.0801585	0.158071	8.96449	0.00275278	3.7225	0.0536839	0.407889	0.523043	88.8449	73.1363	0	0.0629619	0.0239325	0
rs12103884	17:38045725	q12	T/C	ZPBP2/GSDMB	0.86 (0.56 - 1.33)	-0.145161	0.218174	1.18463e-06	0.83 (0.72 - 0.95)	-0.188817	0.0699557	0.000526666	1.00 (0.76 - 1.31)	-0.000875672	0.139447	0.649655	12.7892	0.000348633	1.37299	0.241299	2.61022	0.106177	92.1809	27.1662	61.6891	0.0878499	0.00298899	0.0247022
rs9906951	17:38048244	q12	C/T	ZPBP2/GSDMB	0.88 (0.56 - 1.38)	-0.132974	0.230362	9.55958e-07	0.83 (0.73 - 0.96)	-0.18237	0.0701598	0.000782993	1.01 (0.75 - 1.36)	0.00723387	0.151725	0.626606	14.4594	0.000143214	1.38606	0.239072	3.09697	0.0784384	93.0841	27.853	67.7103	0.0988738	0.00306708	0.0318105
rs12950209	17:38049102	q12	C/T	ZPBP2/GSDMB	0.86 (0.56 - 1.31)	-0.153487	0.214965	9.0835e-07	0.83 (0.71 - 0.99)	-0.180879	0.0847639	0.000523171	0.98 (0.77 - 1.25)	-0.0192758	0.123182	0.576102	12.181	0.000482782	1.83145	0.175956	2.01327	0.155929	91.7905	45.3986	50.3296	0.0849359	0.00700861	0.0161123
rs12950743	17:38049233	q12	C/T	ZPBP2/GSDMB	0.86 (0.56 - 1.32)	-0.148118	0.216874	1.08825e-06	0.83 (0.73 - 0.94)	-0.191909	0.0660416	0.000520838	1.00 (0.76 - 1.32)	-0.000742915	0.140958	0.644257	12.6416	0.000377251	1.25319	0.262943	2.66502	0.102577	92.0896	20.2039	62.4768	0.0867215	0.0020288	0.0255275
rs7359623	17:38049589	q12	T/C	ZPBP2/GSDMB	0.86 (0.56 - 1.31)	-0.155026	0.218325	6.916e-07	0.83 (0.70 - 0.98)	-0.18427	0.0847807	0.000428302	0.98 (0.77 - 1.26)	-0.0161665	0.126496	0.587349	12.5452	0.000397229	1.83109	0.175999	2.11032	0.146309	92.0288	45.3876	52.6137	0.0878313	0.00700503	0.0176633
rs567122494	17:38050092	q12	A/A2G	ZPBP2/GSDMB	0.78 (0.51 - 1.17)	-0.254298	0.209636	1.71615e-09	0.80 (0.71 - 0.90)	-0.222765	0.0601128	0.000253616	0.92 (0.69 - 1.22)	-0.0856001	0.146857	0.14029	9.71254	0.00183015	0.784702	0.375707	2.38075	0.122839	89.704	0	57.9964	0.0790244	0	0.026187
rs8067378	17:38051348	q12	G/A	ZPBP2/GSDMB	0.85 (0.58 - 1.24)	-0.16619	0.194383	1.06875e-06	0.89 (0.69 - 1.15)	-0.114117	0.130343	0.00365949	0.92 (0.79 - 1.07)	-0.0850732	0.0771973	0.298967	10.7352	0.00105114	4.27953	0.0385741	0.410727	0.521601	90.6849	76.6329	0	0.0686256	0.0263502	0
rs33975881	17:38055251	q12	A/AT	ZPBP2/GSDMB	0.79 (0.61 - 1.03)	-0.236815	0.133691	8.02421e-07	0.82 (0.71 - 0.95)	-0.19967	0.0763527	0.000420158	0.92 (0.78 - 1.08)	-0.0815654	0.0825271	0.354409	4.08638	0.0432302	1.37374	0.241171	0.338343	0.560787	75.5284	27.2059	0	0.0273905	0.00378035	0
rs570254669	17:38055921	q12	AT2/A	GSDMB	0.79 (0.51 - 1.22)	-0.232575	0.220243	7.75217e-09	0.80 (0.71 - 0.91)	-0.21749	0.0608813	0.000424658	0.93 (0.69 - 1.26)	-0.0717138	0.155254	0.175716	10.0892	0.00149142	0.82458	0.363845	2.53594	0.111281	90.0884	0	60.5669	0.0876014	0	0.0304504
rs11651596	17:38056116	q12	C/T	GSDMB	0.79 (0.52 - 1.20)	-0.238279	0.216434	4.7805e-09	0.80 (0.71 - 0.90)	-0.226662	0.0601721	0.000199085	0.94 (0.69 - 1.29)	-0.060402	0.160949	0.200009	10.3153	0.00131933	0.629518	0.427532	2.81275	0.093518	90.3057	0	64.4476	0.0847752	0	0.0344933
rs12949100	17:38057189	q12	A/G	GSDMB	0.73 (0.54 - 0.98)	-0.314421	0.151804	2.17397e-09	0.78 (0.69 - 0.88)	-0.247658	0.063489	0.000115633	0.88 (0.72 - 1.07)	-0.130945	0.10258	0.127089	3.75339	0.0527006	0.287398	0.591893	1.15357	0.282802	73.3574	0	13.3128	0.0347052	0	0.00395801
rs8069176	17:38057197	q12	A/G	GSDMB	0.84 (0.52 - 1.33)	-0.179498	0.237369	4.71449e-08	0.82 (0.72 - 0.94)	-0.199035	0.0693729	0.000415638	0.98 (0.72 - 1.33)	-0.0244969	0.15833	0.380871	14.5323	0.000137774	1.29603	0.254939	3.16977	0.0750132	93.1188	22.8414	68.4519	0.105012	0.00252058	0.0349881
rs4795399	17:38061439	q12	C/T	GSDMB	0.71 (0.54 - 0.94)	-0.33861	0.140226	5.03371e-10	0.79 (0.69 - 0.89)	-0.23993	0.0633622	0.00018397	0.85 (0.71 - 1.01)	-0.163104	0.0886745	0.0755793	3.26533	0.0707589	0.426518	0.513703	0.822756	0.364375	69.3752	0	0	0.0282278	0	0
rs2305480	17:38062196	q12	A/G	GSDMB	0.71 (0.55 - 0.93)	-0.336257	0.13602	9.91563e-10	0.79 (0.70 - 0.90)	-0.232042	0.0635744	0.000315287	0.85 (0.71 - 1.01)	-0.165567	0.0889784	0.0721029	3.08134	0.0791952	0.361162	0.547862	0.832591	0.361524	67.5466	0	0	0.0259622	0	0
rs2305479	17:38062217	q12	T/C	GSDMB	0.76 (0.59 - 0.99)	-0.270171	0.132561	1.02562e-07	0.80 (0.71 - 0.90)	-0.223746	0.0613487	0.000318749	0.90 (0.76 - 1.06)	-0.105997	0.0855055	0.239777	3.30393	0.0691145	0.293279	0.588127	0.959413	0.327335	69.733	0	0	0.0252729	0	0
rs750119990	17:38062942	q12	AC/A	GSDMB	0.74 (0.55 - 0.99)	-0.305914	0.151571	3.19485e-09	0.80 (0.71 - 0.90)	-0.224813	0.0624552	0.000382718	0.88 (0.70 - 1.10)	-0.12961	0.116726	0.0951973	4.14914	0.0416556	0.19828	0.656113	1.42438	0.232683	75.8986	0	29.7942	0.0355175	0	0.00969882
rs56750287	17:38062944	q12	C/A	GSDMB	0.74 (0.55 - 0.99)	-0.304757	0.152631	3.26851e-09	0.80 (0.71 - 0.90)	-0.225166	0.0624216	0.000371722	0.88 (0.70 - 1.12)	-0.125761	0.12053	0.0971256	4.20883	0.0402141	0.175827	0.674984	1.49415	0.221574	76.2404	0	33.0723	0.0361588	0	0.0112759
rs11078926	17:38062976	q12	A/G	GSDMB	0.71 (0.55 - 0.93)	-0.336254	0.136017	9.91994e-10	0.79 (0.70 - 0.90)	-0.23297	0.0635693	0.000297537	0.85 (0.71 - 1.01)	-0.164597	0.0889752	0.0738467	3.08119	0.0792026	0.369371	0.543347	0.822864	0.364344	67.545	0	0	0.0259603	0	0
rs883770	17:38063381	q12	T/C	GSDMB	0.76 (0.59 - 0.99)	-0.271978	0.132057	9.20323e-08	0.80 (0.71 - 0.90)	-0.224136	0.0613566	0.000311532	0.90 (0.76 - 1.06)	-0.107041	0.0855245	0.235054	3.27953	0.070149	0.302173	0.582523	0.937988	0.332796	69.5078	0	0	0.0250112	0	0
rs62067034	17:38063738	q12	T/C	GSDMB	0.76 (0.59 - 0.98)	-0.273315	0.131326	8.6033e-08	0.80 (0.71 - 0.90)	-0.223945	0.06137	0.000316303	0.90 (0.76 - 1.06)	-0.108038	0.0855407	0.230583	3.24575	0.071609	0.303073	0.581962	0.923351	0.336597	69.1905	0	0	0.0246375	0	0
rs36000226	17:38063929	q12	C/T	GSDMB	0.76 (0.59 - 0.98)	-0.27464	0.130573	8.00766e-08	0.80 (0.71 - 0.90)	-0.223732	0.0613807	0.000321373	0.90 (0.76 - 1.06)	-0.109033	0.0855528	0.226178	3.21153	0.073121	0.304121	0.58131	0.908378	0.340545	68.8622	0	0	0.0242558	0	0
rs36084703	17:38063980	q12	C/CA	GSDMB	0.74 (0.61 - 0.89)	-0.30743	0.0949343	4.07545e-08	0.79 (0.70 - 0.89)	-0.231045	0.0611527	0.000190319	0.90 (0.76 - 1.06)	-0.108571	0.085158	0.225995	1.87992	0.170344	0.175636	0.675151	0.536159	0.464029	46.8061	0	0	0.009243	0	0
rs11078927	17:38064405	q12	T/C	GSDMB	0.72 (0.55 - 0.95)	-0.324432	0.139312	2.70766e-09	0.79 (0.70 - 0.89)	-0.236875	0.0637735	0.000245229	0.86 (0.72 - 1.02)	-0.152055	0.0892561	0.100933	3.16215	0.0753638	0.345572	0.556631	0.882358	0.347557	68.376	0	0	0.0275399	0	0
rs11078928	17:38064469	q12	C/T	GSDMB	0.71 (0.56 - 0.90)	-0.33898	0.121972	2.65886e-09	0.79 (0.70 - 0.89)	-0.237772	0.0638239	0.000234669	0.86 (0.72 - 1.02)	-0.151143	0.089394	0.103644	2.45555	0.11711	0.324732	0.568778	0.670078	0.413025	59.2759	0	0	0.0187814	0	0
rs12939832	17:38064876	q12	A/G	GSDMB	0.73 (0.55 - 0.97)	-0.320569	0.145945	3.47635e-09	0.78 (0.69 - 0.89)	-0.242786	0.0643605	0.000194853	0.86 (0.72 - 1.03)	-0.145719	0.0899846	0.119773	3.41557	0.064584	0.354985	0.551305	0.955415	0.328345	70.7223	0	0	0.0310839	0	0
rs2290400	17:38066240	q12	C/T	GSDMB	0.79 (0.62 - 1.01)	-0.23186	0.1252	6.46725e-07	0.86 (0.68 - 1.08)	-0.148428	0.117339	0.00101565	0.91 (0.78 - 1.06)	-0.0908319	0.0776485	0.26874	4.58267	0.0322968	3.45213	0.0631704	1.0857e-05	0.997371	78.1787	71.0323	0	0.0246737	0.0199163	0
rs1008723	17:38066267	q12	T/G	GSDMB	0.81 (0.59 - 1.11)	-0.209204	0.161922	1.06237e-06	0.82 (0.73 - 0.92)	-0.199972	0.0594034	0.000686038	0.93 (0.78 - 1.10)	-0.0747659	0.0858727	0.370816	6.30184	0.0120612	1.02349	0.311693	1.07191	0.300514	84.1316	2.29486	6.70858	0.0443523	0.00021202	0.00123779
rs56380902	17:38066372	q12	C/T	GSDMB	0.78 (0.64 - 0.93)	-0.254314	0.0952006	4.49994e-07	0.87 (0.70 - 1.07)	-0.144661	0.110311	0.00181275	0.90 (0.77 - 1.05)	-0.10499	0.0778579	0.199069	2.67187	0.102136	3.03426	0.0815236	0.0586509	0.808641	62.573	67.0431	0	0.0115719	0.0167126	0
rs4795400	17:38067020	q12	T/C	GSDMB	0.70 (0.56 - 0.86)	-0.362156	0.108584	3.33201e-10	0.80 (0.71 - 0.90)	-0.225391	0.0630336	0.000419262	0.84 (0.70 - 0.99)	-0.178172	0.0879717	0.0495027	2.25874	0.132862	0.434335	0.50987	0.421931	0.515975	55.7276	0	0	0.0139549	0	0
rs4795401	17:38067533	q12	G/A	GSDMB	0.76 (0.62 - 0.93)	-0.277282	0.104876	9.41766e-08	0.81 (0.72 - 0.91)	-0.206505	0.0588003	0.000533405	0.90 (0.76 - 1.05)	-0.10826	0.0817128	0.207448	2.68319	0.101413	0.38169	0.5367	0.489502	0.484149	62.7309	0	0	0.0142311	0	0
rs869402	17:38068043	q12	C/T	GSDMB	1.41 (1.21 - 1.65)	0.347034	0.0785687	2.20311e-09	1.25 (1.11 - 1.41)	0.223302	0.0607739	0.000286736	1.15 (0.98 - 1.36)	0.142293	0.0844715	0.104981	1.4161	0.234047	0.378388	0.538467	0.212319	0.644955	29.3833	0	0	0.00428464	0	0
rs1011082	17:38068514	q12	C/T	GSDMB	1.25 (0.89 - 1.76)	0.224688	0.174768	6.76621e-08	1.22 (1.09 - 1.37)	0.202045	0.0581509	0.000613444	1.07 (0.82 - 1.39)	0.0649387	0.133493	0.232609	7.6882	0.00555831	0.298458	0.58485	2.18245	0.139592	86.9931	0	54.1799	0.0533189	0	0.0203476
rs921650	17:38069076	q12	A/G	GSDMB	1.37 (1.13 - 1.65)	0.313298	0.0961037	1.02462e-08	1.24 (1.11 - 1.40)	0.217734	0.0601262	0.000352106	1.14 (0.96 - 1.34)	0.127754	0.0834875	0.142588	2.06793	0.150426	0.279599	0.596964	0.456104	0.49945	51.6424	0	0	0.0101965	0	0
rs921649	17:38069274	q12	T/C	GSDMB	1.37 (1.14 - 1.65)	0.314285	0.0951886	9.92577e-09	1.24 (1.11 - 1.40)	0.21877	0.0601234	0.000329292	1.14 (0.96 - 1.34)	0.126989	0.083488	0.145106	2.03307	0.15391	0.246456	0.619581	0.476107	0.490191	50.8133	0	0	0.00986647	0	0
rs5820308	17:38069364	q12	T/TCA4	GSDMB	1.46 (1.20 - 1.78)	0.378795	0.1003	7.00358e-11	1.26 (1.12 - 1.43)	0.234763	0.0625868	0.000212094	1.20 (1.01 - 1.42)	0.179196	0.0872302	0.0462165	1.97053	0.160391	0.517065	0.472096	0.276804	0.598803	49.2523	0	0	0.0107718	0	0
rs6503524	17:38069809	q12	T/C	GSDMB	1.37 (1.15 - 1.64)	0.317097	0.0921556	9.04661e-09	1.25 (1.11 - 1.40)	0.220304	0.0600835	0.000295444	1.13 (0.96 - 1.34)	0.126009	0.083429	0.148085	1.92456	0.165354	0.208327	0.648082	0.480577	0.488161	48.0402	0	0	0.00881588	0	0
rs7216389	17:38069949	q12	T/C	GSDMB	1.37 (1.15 - 1.64)	0.317215	0.091991	9.01975e-09	1.25 (1.11 - 1.41)	0.223465	0.0601192	0.000242613	1.13 (0.96 - 1.33)	0.122729	0.0834486	0.159558	1.91891	0.165977	0.174503	0.67614	0.514897	0.473027	47.8871	0	0	0.00876057	0	0
rs7216558	17:38070071	q12	T/C	GSDMB	1.31 (1.13 - 1.52)	0.270356	0.0758138	2.45209e-07	1.17 (0.95 - 1.44)	0.153263	0.106349	0.0011657	1.11 (0.95 - 1.29)	0.103919	0.0776459	0.202623	1.74561	0.186429	2.84285	0.0917814	0.178432	0.672724	42.7135	64.824	0	0.0051511	0.0150757	0
rs7221605	17:38070789	q12	T/C	GSDMB	1.34 (1.09 - 1.66)	0.296293	0.107852	3.47609e-08	1.23 (1.09 - 1.39)	0.207022	0.0606567	0.000769229	1.13 (0.94 - 1.36)	0.123191	0.0926287	0.143259	2.40631	0.120847	0.0224253	0.880961	1.10352	0.293494	58.4425	0	9.3812	0.014344	0	0.0022158
rs143385463	17:38071855	q12	A/AT3	GSDMB	1.35 (1.08 - 1.68)	0.2987	0.113053	1.84618e-08	1.21 (1.08 - 1.36)	0.192297	0.060493	0.00176247	1.14 (0.92 - 1.41)	0.130625	0.108271	0.0888307	2.64685	0.103755	0.00394869	0.949895	1.35151	0.245014	62.2193	0	26.0089	0.0166165	0	0.00744803
rs1031458	17:38072173	q12	T/G	GSDMB	1.34 (1.08 - 1.66)	0.292448	0.110473	4.08289e-08	1.23 (1.09 - 1.39)	0.207022	0.0606536	0.000768716	1.13 (0.93 - 1.36)	0.118541	0.0962612	0.149726	2.51518	0.112755	0.0218848	0.882394	1.15443	0.282624	60.2414	0	13.3772	0.0154389	0	0.00330406
rs1031460	17:38072247	q12	G/T	GSDMB	1.34 (1.08 - 1.66)	0.291967	0.109899	4.50064e-08	1.23 (1.09 - 1.38)	0.206367	0.0606681	0.000802042	1.13 (0.93 - 1.36)	0.118436	0.0961238	0.150695	2.49039	0.114543	0.020372	0.886503	1.15201	0.283128	59.8457	0	13.1955	0.0151921	0	0.00325309
rs8065777	17:38072402	q12	T/C	GSDMB	1.34 (1.08 - 1.66)	0.292572	0.110531	4.03722e-08	1.23 (1.09 - 1.38)	0.20666	0.060666	0.000787693	1.13 (0.93 - 1.36)	0.118773	0.0966318	0.148099	2.51745	0.112593	0.0210389	0.884673	1.15962	0.281544	60.2773	0	13.765	0.0154629	0	0.00341588
rs2872516	17:38072727	q12	T/C	GSDMB	1.39 (1.06 - 1.83)	0.328983	0.139718	1.02316e-09	1.25 (1.11 - 1.42)	0.224384	0.0628182	0.000425305	1.15 (0.90 - 1.46)	0.140596	0.122884	0.0662695	3.39751	0.0652949	0.052094	0.819459	1.47378	0.22475	70.5667	0	32.1473	0.0283752	0	0.0117272
rs541186443	17:38073838	q12	C/C2G	GSDMB	1.22 (0.81 - 1.84)	0.201118	0.209801	3.94091e-08	1.21 (1.08 - 1.36)	0.189063	0.0586186	0.00150106	1.07 (0.81 - 1.42)	0.0657061	0.143849	0.202938	10.5866	0.0011391	0.841652	0.358925	2.45626	0.117057	90.5541	0	59.2878	0.0798712	0	0.0255775
rs77749396	17:38073840	q12	C/G	GSDMB	1.33 (1.05 - 1.68)	0.284397	0.119804	2.09234e-07	1.22 (1.07 - 1.38)	0.195077	0.0634947	0.00252612	1.11 (0.86 - 1.42)	0.101465	0.126177	0.157383	2.84763	0.0915087	0.000580724	0.980774	1.62158	0.202872	64.8831	0	38.3316	0.0192399	0	0.013806
rs58989791	17:38073842	q12	C/CG	GSDMB	1.22 (0.81 - 1.84)	0.201048	0.209879	3.93746e-08	1.21 (1.08 - 1.36)	0.188965	0.0586208	0.00151046	1.07 (0.81 - 1.42)	0.0658063	0.143821	0.202573	10.5945	0.00113425	0.844354	0.358155	2.45523	0.117134	90.5611	0	59.2707	0.0799366	0	0.0255614
rs9303279	17:38073968	q12	C/G	GSDMB	1.45 (1.19 - 1.77)	0.374799	0.101062	2.37025e-10	1.29 (1.14 - 1.46)	0.251992	0.0631956	8.06555e-05	1.17 (0.98 - 1.39)	0.15547	0.0884016	0.0899329	1.82602	0.176598	0.153052	0.695635	0.602736	0.437536	45.2361	0	0	0.0103792	0	0
rs9303280	17:38074031	q12	C/T	GSDMB	1.30 (1.04 - 1.61)	0.259355	0.112182	3.62919e-07	1.21 (1.08 - 1.36)	0.192309	0.0588508	0.00129445	1.10 (0.92 - 1.33)	0.0989939	0.094698	0.209366	3.04013	0.0812293	0.0283449	0.866301	1.20997	0.271338	67.1067	0	17.3532	0.0172991	0	0.00375467
rs9303281	17:38074046	q12	A/G	GSDMB	1.26 (1.02 - 1.57)	0.234912	0.110727	1.01913e-06	1.18 (1.00 - 1.39)	0.163239	0.0848434	0.00137038	1.10 (0.94 - 1.27)	0.0910219	0.0770526	0.263799	3.63787	0.0564792	1.89001	0.169201	0.0223224	0.881233	72.5114	47.0903	0	0.0179697	0.00723009	0
rs7219923	17:38074518	q12	T/C	GSDMB	1.31 (1.13 - 1.51)	0.268239	0.0732117	3.43156e-07	1.16 (0.93 - 1.44)	0.146643	0.111121	0.0014452	1.11 (0.95 - 1.29)	0.104219	0.0776008	0.200983	1.64246	0.199989	3.09816	0.0783808	0.254995	0.613579	39.1156	67.7228	0	0.00442377	0.0171169	0
rs201389301	17:38075009	q12	AC/A	GSDMB/ORMDL3	1.32 (1.11 - 1.57)	0.278798	0.0875085	1.1828e-07	1.14 (0.83 - 1.57)	0.131555	0.16381	0.000299176	1.11 (0.95 - 1.30)	0.107274	0.0800417	0.201969	2.11174	0.146173	5.96266	0.014612	0.668923	0.413427	52.6457	83.229	0	0.00838038	0.0449895	0
rs7224129	17:38075426	q12	A/G	GSDMB/ORMDL3	1.31 (1.13 - 1.52)	0.269465	0.0756363	2.72747e-07	1.16 (0.93 - 1.44)	0.146856	0.11277	0.00136289	1.11 (0.95 - 1.29)	0.105798	0.0777031	0.194533	1.74021	0.187112	3.17173	0.0749229	0.247726	0.618681	42.5358	68.4715	0	0.0051044	0.0178053	0
rs8074437	17:38076137	q12	G/T	GSDMB/ORMDL3	1.31 (1.13 - 1.52)	0.270033	0.0755176	2.64299e-07	1.16 (0.93 - 1.44)	0.149169	0.111566	0.00125469	1.11 (0.95 - 1.29)	0.104642	0.0777346	0.199888	1.73229	0.188119	3.10115	0.078237	0.236619	0.626659	42.273	67.7539	0	0.0050603	0.0172638	0
rs4065275	17:38080865	q12	G/A	ORMDL3	1.30 (1.11 - 1.52)	0.261266	0.0792404	5.97723e-07	1.15 (0.90 - 1.46)	0.13569	0.122603	0.0018238	1.11 (0.95 - 1.30)	0.105346	0.0786365	0.202167	1.84643	0.1742	3.54505	0.0597234	0.248254	0.618307	45.8413	71.7916	0	0.00603143	0.0220113	0
rs8076131	17:38080912	q12	A/G	ORMDL3	1.40 (1.05 - 1.87)	0.339709	0.147129	8.31651e-11	1.27 (1.12 - 1.43)	0.238437	0.0620544	0.000146933	1.18 (1.00 - 1.40)	0.169568	0.0864408	0.057421	4.17179	0.0411024	0.600717	0.438305	0.802233	0.370427	76.0295	0	0	0.033471	0	0
rs4795403	17:38085722	q12	C/T	AC090844.2	1.51 (1.31 - 1.74)	0.410894	0.0730849	2.59685e-08	1.21 (1.05 - 1.40)	0.192902	0.0726248	0.00931228	1.26 (1.03 - 1.55)	0.234592	0.102519	0.0257914	0.262856	0.608165	0.413641	0.520127	0.452728	0.501043	0	0	0	0	0	0
rs7224908	17:38086854	q12	G/A	AC090844.2	1.49 (1.29 - 1.72)	0.399555	0.0719882	3.66957e-08	1.21 (1.05 - 1.40)	0.192493	0.0717732	0.00862913	1.25 (1.03 - 1.53)	0.224131	0.101219	0.0311812	0.229482	0.631909	0.0331532	0.85552	0.124184	0.72454	0	0	0	0	0	0
rs12946393	17:38087429	q12	G/T	AC090844.2	1.52 (1.31 - 1.75)	0.416938	0.0734352	1.97021e-08	1.22 (1.05 - 1.40)	0.196355	0.0729996	0.0084303	1.27 (1.04 - 1.55)	0.238286	0.103014	0.0241708	0.240672	0.623721	0.641612	0.423128	0.586423	0.443806	0	0	0	0	0	0
rs4795405	17:38088417	q12	C/T	AC090844.2	1.29 (1.05 - 1.58)	0.252159	0.105753	7.61374e-07	1.21 (1.08 - 1.36)	0.193197	0.0573233	0.000898298	1.10 (0.94 - 1.28)	0.0922177	0.0799388	0.275767	2.96402	0.0851362	0.267632	0.604925	0.613302	0.433547	66.262	0	0	0.0151139	0	0
rs140683487	17:38089317	q12	A3G2/A	AC090844.2	1.32 (1.04 - 1.68)	0.280936	0.121274	3.07961e-08	1.14 (0.88 - 1.49)	0.133536	0.134113	0.00172987	1.16 (0.99 - 1.36)	0.147198	0.0814795	0.0811729	3.95223	0.0468092	3.85449	0.0496131	0.0291466	0.864441	74.6979	74.0562	0	0.0221721	0.0271282	0
rs4794820	17:38089344	q12	G/A	AC090844.2	1.23 (0.91 - 1.65)	0.207139	0.151058	1.82022e-06	1.16 (0.96 - 1.39)	0.145877	0.0932281	0.00360571	1.10 (0.94 - 1.28)	0.0956366	0.0784204	0.247877	6.61964	0.010086	2.16668	0.14103	0.25558	0.613173	84.8934	53.8465	0	0.0388532	0.0098176	0
rs7221814	17:38089717	q12	G/A	AC090844.2	1.39 (1.07 - 1.80)	0.328946	0.132842	1.52389e-09	1.23 (1.07 - 1.43)	0.210635	0.0746909	0.000676201	1.18 (1.00 - 1.41)	0.168837	0.0882169	0.0640319	3.30934	0.0688872	1.16867	0.279675	0.259202	0.610669	69.7825	14.4327	0	0.0253068	0.00229723	0
rs12601749	17:38093315	q12	G/A	AC090844.2	1.09 (0.59 - 1.99)	0.0816093	0.310277	4.28867e-08	1.15 (0.98 - 1.35)	0.139109	0.0813216	0.0125238	0.98 (0.63 - 1.54)	-0.0183716	0.228596	0.169018	20.2693	6.72727e-06	1.48342	0.223241	5.40224	0.0201109	95.0664	32.5881	81.4892	0.183174	0.00495834	0.0860207
rs4065985	17:38101932	q21.1	C/G	LRRC3C	1.07 (0.58 - 1.97)	0.06981	0.309597	1.066e-07	1.16 (1.00 - 1.35)	0.150996	0.0751702	0.00913845	0.96 (0.61 - 1.52)	-0.0405522	0.23415	0.199806	19.9074	8.12859e-06	1.31589	0.251331	5.62614	0.0176946	94.9767	24.0058	82.2258	0.182207	0.00324393	0.0909963
rs3893044	17:38103016	q21.1	C/T	LRRC3C	1.07 (0.59 - 1.96)	0.0686961	0.307992	1.33367e-07	1.16 (1.01 - 1.35)	0.152406	0.0743008	0.0087547	0.96 (0.61 - 1.51)	-0.0426854	0.233362	0.208347	19.7395	8.87495e-06	1.29519	0.255094	5.59721	0.0179891	94.934	22.7913	82.134	0.180244	0.00302805	0.0902924
rs8080734	17:38103285	q21.1	A/G	LRRC3C	1.07 (0.59 - 1.96)	0.0682889	0.307518	1.4337e-07	1.17 (1.02 - 1.34)	0.155839	0.0715607	0.00819573	0.96 (0.60 - 1.51)	-0.045606	0.235047	0.206346	19.6855	9.12903e-06	1.2275	0.267894	5.66887	0.0172686	94.9201	18.5334	82.3598	0.179664	0.00234145	0.091834
A1: effect allele; A2: non-effect allele; Chr: chromosome; CI: confidence interval; OR: odds ratio; pos: position; p: p-value; Q: Cochran's Q ; SE: standard error
Statistically significant associations are highlighted in bold.
a Coordinates are referred to the GRCh37 reference genome.
b Subindexes refers to the repetition of a particular nucleotide in the specified allele.

## Sheet: Table_S3
Table S3. Summary of the suggestive variants identified among males (p <= 1.9 x 10-6), their association results among females, and in the interaction analyses.
rsID	Chr:pos a	Band	A1/A2 b	Closest gene	OR (95% CI)male	β male	SE male	p male	OR (95% CI)female	β female	SE female	p female	OR (95% CI)interaction	β interaction	SE interaction	p interaction	Qmale	Q pmale	Q female	p Qfemale	Q interaction	p Q interaction	I2male	I2female	I2interaction	TAU2male	TAU2female	TAU2interaction
rs13433039	2:42023205	p21	T/A	LDHAP3	1.46 (1.25 - 1.70)	0.376783	0.0777081	1.52384e-06	1.16 (1.00 - 1.34)	0.147482	0.0733315	0.0511799	0.79 (0.64 - 0.96)	-0.241706	0.104103	0.0236262	0.277193	0.598547	0.00612232	0.937633	0.0228037	0.879969	0	0	0	0	0	0
rs13403511	2:42027527	p21	C/G	LDHAP3	1.44 (1.24 - 1.67)	0.365182	0.075456	1.59139e-06	1.17 (1.02 - 1.35)	0.157382	0.0712997	0.031738	0.80 (0.66 - 0.98)	-0.220383	0.101487	0.0347193	0.235401	0.627547	0.0107125	0.917565	0.012056	0.912568	0	0	0	0	0	0
rs10211025	2:42028633	p21	G/A	LDHAP3	1.46 (1.26 - 1.70)	0.380481	0.0766488	8.37551e-07	1.16 (1.01 - 1.34)	0.151231	0.071874	0.0409891	0.79 (0.64 - 0.96)	-0.241496	0.102471	0.0215416	0.183633	0.668269	0.0159193	0.899596	0.00350488	0.952791	0	0	0	0	0	0
rs10207164	2:42031062	p21	C/T	LDHAP3	1.45 (1.25 - 1.68)	0.372858	0.0747892	7.49643e-07	1.15 (1.01 - 1.33)	0.14382	0.070815	0.0488539	0.79 (0.64 - 0.96)	-0.242026	0.100605	0.0188877	0.165624	0.68403	0.190137	0.662803	0.0280622	0.866963	0	0	0	0	0	0
rs1394084	4:18202615	p15.31	A/G	LCORL	0.76 (0.52 - 1.10)	-0.279733	0.189356	1.69029e-06	0.94 (0.79 - 1.12)	-0.0632715	0.0891405	0.306661	1.26 (1.03 - 1.53)	0.228034	0.101508	0.0287315	4.5882	0.0321927	1.40844	0.235316	0.367069	0.544606	78.205	28.9993	0	0.0568454	0.0051951	0
rs1503882	4:18202684	p15.31	C/T	LCORL	0.76 (0.51 - 1.15)	-0.2695	0.210363	1.21252e-06	0.94 (0.78 - 1.13)	-0.0598361	0.0936361	0.318831	1.26 (1.03 - 1.54)	0.233409	0.102712	0.0268722	5.44627	0.0196101	1.46609	0.225964	0.551639	0.457649	81.6388	31.7912	0	0.072982	0.00630054	0
rs1809964	4:18203048	p15.31	A/G	LCORL	0.76 (0.51 - 1.15)	-0.268644	0.207757	1.42025e-06	0.93 (0.77 - 1.12)	-0.0699491	0.0955433	0.246557	1.25 (1.02 - 1.52)	0.220283	0.102593	0.0368839	5.32611	0.0210082	1.51554	0.218295	0.516227	0.472456	81.2246	34.017	0	0.0708577	0.00696433	0
rs1039541	4:18217582	p15.31	G/A	LCORL	0.65 (0.56 - 0.76)	-0.423955	0.0793447	1.06122e-07	0.91 (0.78 - 1.06)	-0.095192	0.0762358	0.236208	1.32 (1.07 - 1.63)	0.275369	0.108076	0.012732	0.675331	0.411199	0.231612	0.630331	0.0306703	0.860978	0	0	0	0	0	0
rs1503888	4:18218019	p15.31	C/T	LCORL	0.64 (0.55 - 0.76)	-0.441713	0.0825333	1.01388e-07	0.90 (0.77 - 1.05)	-0.109129	0.0797283	0.192069	1.32 (1.06 - 1.65)	0.278909	0.11299	0.0159079	0.601341	0.438067	0.0616628	0.803887	0.116281	0.733104	0	0	0	0	0	0
rs10009303	4:18218684	p15.31	T/C	LCORL	0.65 (0.56 - 0.76)	-0.424713	0.0776584	5.45063e-08	0.91 (0.79 - 1.06)	-0.0920953	0.0743848	0.240397	1.32 (1.07 - 1.62)	0.278166	0.105703	0.0100071	0.284908	0.593502	0.408299	0.522834	0.0245943	0.875382	0	0	0	0	0	0
rs1503887	4:18219702	p15.31	G/A	LCORL	0.66 (0.56 - 0.77)	-0.421936	0.0793148	1.23211e-07	0.91 (0.78 - 1.06)	-0.0957166	0.0762071	0.233315	1.31 (1.06 - 1.62)	0.272992	0.108038	0.013515	0.72462	0.394633	0.241584	0.623064	0.0355271	0.850496	0	0	0	0	0	0
rs6857578	4:18220294	p15.31	C/G	LCORL	0.66 (0.56 - 0.77)	-0.420217	0.0792886	1.38329e-07	0.90 (0.77 - 1.04)	-0.108593	0.0760367	0.172591	1.30 (1.05 - 1.60)	0.258771	0.107885	0.0192541	0.761727	0.382789	0.225748	0.634694	0.0509662	0.82139	0	0	0	0	0	0
rs6835889	4:18220514	p15.31	G/A	LCORL	0.64 (0.54 - 0.75)	-0.445261	0.0826312	8.29261e-08	0.91 (0.78 - 1.06)	-0.0949593	0.0798969	0.260743	1.34 (1.08 - 1.68)	0.295943	0.113156	0.0104904	0.627052	0.428439	0.0707639	0.790228	0.108588	0.741758	0	0	0	0	0	0
rs11735049	4:18221165	p15.31	G/A	LCORL	0.64 (0.54 - 0.75)	-0.445411	0.0826118	8.13327e-08	0.91 (0.78 - 1.06)	-0.0957869	0.0798781	0.256288	1.34 (1.08 - 1.68)	0.2953	0.11313	0.0106468	0.622289	0.430198	0.074575	0.784788	0.103917	0.747179	0	0	0	0	0	0
rs4593128	4:18221770	p15.31	G/T	LCORL	0.64 (0.54 - 0.75)	-0.452311	0.0826364	5.3061e-08	0.92 (0.78 - 1.07)	-0.0885537	0.0798056	0.295482	1.36 (1.09 - 1.70)	0.30927	0.113108	0.00738014	0.64477	0.421989	0.0667296	0.796159	0.117713	0.731528	0	0	0	0	0	0
rs2874307	4:18221857	p15.31	A/G	LCORL	0.64 (0.55 - 0.76)	-0.441363	0.0826773	1.09015e-07	0.89 (0.76 - 1.04)	-0.112835	0.0798094	0.177153	1.32 (1.05 - 1.64)	0.274697	0.11314	0.01778	0.55375	0.456789	0.0734409	0.786391	0.0922204	0.761373	0	0	0	0	0	0
rs2320564	4:18222020	p15.31	C/T	LCORL	0.64 (0.54 - 0.75)	-0.445377	0.0826158	8.16813e-08	0.91 (0.78 - 1.06)	-0.0962783	0.0798694	0.253677	1.34 (1.08 - 1.68)	0.294737	0.113126	0.0107984	0.609315	0.435046	0.0763436	0.782315	0.0989355	0.753111	0	0	0	0	0	0
rs4057271	4:18222259	p15.31	T/C	LCORL	0.64 (0.55 - 0.76)	-0.440467	0.0825263	1.09846e-07	0.89 (0.76 - 1.04)	-0.112533	0.0796518	0.177475	1.32 (1.05 - 1.64)	0.274241	0.112929	0.017755	0.55445	0.456505	0.0684619	0.79359	0.0966382	0.755902	0	0	0	0	0	0
rs77322330	4:18222564	p15.31	C/T	LCORL	0.64 (0.55 - 0.76)	-0.440364	0.0825229	1.10635e-07	0.89 (0.76 - 1.04)	-0.11281	0.0796446	0.176318	1.32 (1.05 - 1.64)	0.273869	0.112921	0.0179074	0.548692	0.458853	0.0688969	0.79295	0.0945579	0.758461	0	0	0	0	0	0
rs76109068	4:18223536	p15.31	A/G	LCORL	0.65 (0.56 - 0.77)	-0.427628	0.0817567	2.03677e-07	0.90 (0.77 - 1.05)	-0.104116	0.0781775	0.204968	1.31 (1.05 - 1.63)	0.2691	0.11114	0.0181058	0.45305	0.50089	0.0452521	0.831541	0.0857763	0.769617	0	0	0	0	0	0
rs10002030	4:18223835	p15.31	A/G	LCORL	0.65 (0.56 - 0.77)	-0.427676	0.0817487	2.02415e-07	0.90 (0.77 - 1.05)	-0.103531	0.0781589	0.207543	1.31 (1.05 - 1.63)	0.269758	0.111125	0.0177999	0.452468	0.501165	0.0509252	0.821461	0.0803114	0.776876	0	0	0	0	0	0
rs13130073	4:18223920	p15.31	T/C	LCORL	0.65 (0.56 - 0.77)	-0.427588	0.0817442	2.03325e-07	0.90 (0.77 - 1.05)	-0.103633	0.0781559	0.207055	1.31 (1.05 - 1.63)	0.269576	0.11112	0.0178748	0.451923	0.501423	0.0510355	0.821271	0.0800404	0.777243	0	0	0	0	0	0
rs10222763	4:18224453	p15.31	T/G	LCORL	0.66 (0.55 - 0.78)	-0.41796	0.0880757	2.61546e-07	0.91 (0.78 - 1.06)	-0.0981111	0.0777407	0.230961	1.31 (1.06 - 1.63)	0.271133	0.110674	0.0167449	1.05944	0.303343	0.115941	0.733479	0.199061	0.65548	5.61057	0	0	0.00153487	0	0
rs10222692	4:18224567	p15.31	C/A	LCORL	0.66 (0.55 - 0.78)	-0.418086	0.0876717	2.6344e-07	0.91 (0.78 - 1.06)	-0.0982491	0.0777332	0.230223	1.31 (1.06 - 1.63)	0.270848	0.110663	0.0168524	1.0557	0.304199	0.11703	0.732278	0.196939	0.657203	5.27579	0	0	0.00143793	0	0
rs6847468	4:18224963	p15.31	G/A	LCORL	0.67 (0.57 - 0.78)	-0.407821	0.0822404	8.60554e-07	0.92 (0.79 - 1.07)	-0.0858194	0.0787126	0.304415	1.31 (1.05 - 1.63)	0.269714	0.112003	0.0187653	0.940161	0.332236	0.141923	0.706376	0.138403	0.709874	0	0	0	0	0	0
rs6449363	4:18225865	p15.31	G/A	LCORL	0.66 (0.55 - 0.79)	-0.416691	0.0937589	2.15676e-07	0.92 (0.79 - 1.07)	-0.0838759	0.0778761	0.310659	1.33 (1.07 - 1.66)	0.287713	0.110762	0.0110448	1.11648	0.290678	0.134845	0.713461	0.189046	0.663712	10.4326	0	0	0.00300057	0	0
rs6449364	4:18226107	p15.31	G/A	LCORL	0.66 (0.55 - 0.79)	-0.416869	0.0931681	2.18437e-07	0.92 (0.79 - 1.07)	-0.0841167	0.0778625	0.309106	1.33 (1.07 - 1.66)	0.287244	0.110743	0.0111658	1.11049	0.291976	0.136144	0.712145	0.18626	0.666048	9.94963	0	0	0.00284537	0	0
rs10021433	4:18226382	p15.31	A/G	LCORL	0.66 (0.56 - 0.78)	-0.419009	0.084587	2.77789e-07	0.91 (0.78 - 1.05)	-0.099313	0.077666	0.224551	1.31 (1.05 - 1.62)	0.268696	0.110567	0.0176716	1.02797	0.310636	0.125345	0.723308	0.18159	0.67001	2.72104	0	0	0.000720936	0	0
rs1847403	4:18226655	p15.31	T/C	LCORL	0.66 (0.56 - 0.77)	-0.419096	0.0837518	2.83535e-07	0.91 (0.78 - 1.05)	-0.0996352	0.0776437	0.222836	1.31 (1.05 - 1.62)	0.267937	0.110532	0.0179688	1.02076	0.312339	0.128397	0.7201	0.176965	0.673995	2.03371	0	0	0.000534712	0	0
rs1847402	4:18226688	p15.31	C/G	LCORL	0.65 (0.56 - 0.77)	-0.425348	0.0816018	2.26368e-07	0.90 (0.77 - 1.05)	-0.105544	0.0780253	0.197604	1.30 (1.05 - 1.62)	0.265622	0.110937	0.0194759	0.422675	0.515605	0.0652021	0.798455	0.0609891	0.804939	0	0	0	0	0	0
rs7677566	4:18227105	p15.31	A/G	LCORL	0.66 (0.56 - 0.77)	-0.419289	0.0827672	2.88672e-07	0.90 (0.78 - 1.05)	-0.100016	0.0776172	0.220817	1.31 (1.05 - 1.62)	0.267133	0.110493	0.018285	1.01239	0.314331	0.131196	0.717196	0.172303	0.678073	1.22383	0	0	0.000318888	0	0
rs7661313	4:18227132	p15.31	C/T	LCORL	0.66 (0.55 - 0.79)	-0.417271	0.0909118	2.30948e-07	0.92 (0.79 - 1.07)	-0.0849874	0.0778005	0.303436	1.33 (1.07 - 1.65)	0.28526	0.110652	0.011685	1.08827	0.296855	0.143413	0.704911	0.1743	0.676318	8.11088	0	0	0.00226937	0	0
rs2102227	4:18227716	p15.31	T/C	LCORL	0.72 (0.54 - 0.95)	-0.333582	0.145351	6.48719e-07	0.91 (0.79 - 1.05)	-0.0957225	0.0741118	0.219684	1.27 (1.04 - 1.57)	0.241949	0.105213	0.025042	2.2989	0.129466	0.524585	0.468892	0.223395	0.636465	56.5009	0	0	0.0258243	0	0
rs2089089	4:18227864	p15.31	T/A	LCORL	0.66 (0.56 - 0.77)	-0.419578	0.0817191	2.93282e-07	0.90 (0.78 - 1.05)	-0.100268	0.0775938	0.21945	1.31 (1.05 - 1.62)	0.266508	0.110458	0.0185299	1.00357	0.316449	0.134205	0.714111	0.167424	0.682412	0.355419	0	0	9.17529e-05	0	0
rs5856456	4:18228726	p15.31	G/GA	LCORL	0.65 (0.56 - 0.76)	-0.428904	0.0814445	1.68448e-07	0.90 (0.77 - 1.05)	-0.10477	0.0779531	0.200632	1.31 (1.05 - 1.63)	0.27072	0.110834	0.0170817	0.356491	0.550462	0.0356511	0.850238	0.0652223	0.798425	0	0	0	0	0	0
rs10020930	4:18229623	p15.31	G/A	LCORL	0.66 (0.55 - 0.78)	-0.417659	0.0885409	2.44658e-07	0.92 (0.79 - 1.07)	-0.0858318	0.0777336	0.297976	1.33 (1.07 - 1.65)	0.283249	0.110553	0.0122274	1.06576	0.301906	0.151549	0.69706	0.162172	0.687164	6.16983	0	0	0.00168763	0	0
rs10023212	4:18229668	p15.31	G/A	LCORL	0.66 (0.55 - 0.78)	-0.417732	0.0883787	2.4509e-07	0.92 (0.79 - 1.07)	-0.0858728	0.077731	0.297716	1.33 (1.07 - 1.65)	0.283171	0.11055	0.0122497	1.06422	0.302255	0.151918	0.696709	0.161486	0.687792	6.03423	0	0	0.00164808	0	0
rs6856141	4:18229718	p15.31	T/C	LCORL	0.66 (0.56 - 0.77)	-0.419007	0.0812411	3.03119e-07	0.90 (0.78 - 1.05)	-0.10084	0.0775425	0.216376	1.30 (1.05 - 1.62)	0.265151	0.110384	0.019073	0.988885	0.320015	0.139965	0.708316	0.159009	0.69007	0	0	0	0	0	0
rs10805361	4:18230745	p15.31	T/C	LCORL	0.66 (0.56 - 0.77)	-0.422874	0.0814427	2.52838e-07	0.90 (0.77 - 1.05)	-0.107089	0.0778951	0.190021	1.30 (1.05 - 1.61)	0.26182	0.110742	0.0211144	0.399291	0.527456	0.0737316	0.785979	0.0497361	0.823523	0	0	0	0	0	0
rs10029535	4:18231612	p15.31	C/T	LCORL	0.65 (0.56 - 0.77)	-0.426331	0.0814717	2.00949e-07	0.91 (0.78 - 1.06)	-0.0927957	0.0779847	0.260154	1.32 (1.06 - 1.64)	0.279063	0.11081	0.01384	0.418708	0.517582	0.140082	0.708199	0.0223783	0.881085	0	0	0	0	0	0
rs7689074	4:18231947	p15.31	G/A	LCORL	0.65 (0.56 - 0.77)	-0.42537	0.0814301	2.11757e-07	0.91 (0.78 - 1.06)	-0.0927595	0.0780152	0.260545	1.32 (1.06 - 1.64)	0.278135	0.110806	0.0141653	0.435668	0.509221	0.0891834	0.765218	0.0450125	0.831981	0	0	0	0	0	0
rs7694001	4:18231982	p15.31	G/T	LCORL	0.66 (0.56 - 0.77)	-0.421847	0.0813653	2.63779e-07	0.90 (0.77 - 1.05)	-0.107664	0.077829	0.187144	1.30 (1.04 - 1.61)	0.260303	0.110644	0.0217784	0.388848	0.532906	0.077849	0.780234	0.0450045	0.831996	0	0	0	0	0	0
rs2320565	4:18232315	p15.31	C/T	LCORL	0.65 (0.56 - 0.77)	-0.424686	0.081382	2.18826e-07	0.91 (0.78 - 1.06)	-0.0931504	0.0779743	0.258181	1.32 (1.06 - 1.64)	0.277118	0.110746	0.0144788	0.429182	0.51239	0.0919646	0.761694	0.042237	0.837169	0	0	0	0	0	0
rs2320566	4:18232460	p15.31	C/T	LCORL	0.65 (0.56 - 0.77)	-0.424501	0.0813689	2.2077e-07	0.91 (0.78 - 1.06)	-0.0932195	0.0779632	0.25774	1.32 (1.06 - 1.64)	0.276884	0.110729	0.0145496	0.428118	0.512914	0.0930694	0.760311	0.0414853	0.838604	0	0	0	0	0	0
rs2320567	4:18232531	p15.31	A/C	LCORL	0.66 (0.56 - 0.77)	-0.41659	0.081059	3.33759e-07	0.90 (0.78 - 1.05)	-0.102297	0.0773906	0.208552	1.30 (1.05 - 1.61)	0.26146	0.110157	0.0205966	0.943758	0.331313	0.152598	0.696065	0.138069	0.710209	0	0	0	0	0	0
rs7679575	4:18235332	p15.31	C/T	LCORL	0.66 (0.57 - 0.78)	-0.410224	0.0805296	4.2351e-07	0.91 (0.79 - 1.06)	-0.0897171	0.0771375	0.27164	1.30 (1.05 - 1.62)	0.26563	0.109488	0.0178684	0.349405	0.55445	0.0770909	0.781279	0.031365	0.859429	0	0	0	0	0	0
rs2080231	4:18235864	p15.31	G/A	LCORL	0.66 (0.57 - 0.78)	-0.409423	0.0804778	4.37192e-07	0.91 (0.79 - 1.06)	-0.0908041	0.0770716	0.265132	1.30 (1.05 - 1.61)	0.263882	0.10941	0.018575	0.325175	0.568514	0.0871449	0.767839	0.0227119	0.880209	0	0	0	0	0	0
rs6449365	4:18236691	p15.31	A/G	LCORL	0.66 (0.57 - 0.78)	-0.408769	0.0804284	4.49004e-07	0.91 (0.78 - 1.06)	-0.0911841	0.0770316	0.262765	1.30 (1.05 - 1.61)	0.262913	0.109351	0.0189587	0.320067	0.571568	0.0880804	0.766632	0.0214602	0.883532	0	0	0	0	0	0
rs1503867	4:18236714	p15.31	T/G	LCORL	0.67 (0.57 - 0.78)	-0.40567	0.0803776	5.43396e-07	0.90 (0.77 - 1.05)	-0.105481	0.0768605	0.190841	1.28 (1.03 - 1.58)	0.246103	0.109208	0.028216	0.283929	0.594138	0.0782209	0.779723	0.0216226	0.883096	0	0	0	0	0	0
rs1503866	4:18236766	p15.31	T/C	LCORL	0.67 (0.57 - 0.78)	-0.405568	0.0803676	5.45369e-07	0.90 (0.77 - 1.05)	-0.105527	0.0768526	0.190591	1.28 (1.03 - 1.58)	0.245966	0.109196	0.0282888	0.282684	0.594947	0.0785771	0.779235	0.0212562	0.884083	0	0	0	0	0	0
rs1503865	4:18236844	p15.31	T/C	LCORL	0.67 (0.57 - 0.78)	-0.405501	0.0803627	5.47034e-07	0.90 (0.77 - 1.05)	-0.10558	0.0768483	0.19033	1.28 (1.03 - 1.58)	0.245851	0.109189	0.0283551	0.282138	0.595303	0.0786954	0.779073	0.0211105	0.884478	0	0	0	0	0	0
rs4698675	4:18238166	p15.31	G/A	LCORL	0.67 (0.57 - 0.78)	-0.407724	0.080357	4.70182e-07	0.91 (0.78 - 1.06)	-0.0923404	0.0769981	0.256249	1.30 (1.05 - 1.61)	0.260798	0.109282	0.0198934	0.297627	0.585374	0.0830494	0.773207	0.0193548	0.889354	0	0	0	0	0	0
rs1503864	4:18238451	p15.31	T/C	LCORL	0.67 (0.57 - 0.78)	-0.407178	0.0803082	4.79808e-07	0.91 (0.78 - 1.06)	-0.0918456	0.0769305	0.258496	1.30 (1.05 - 1.61)	0.260811	0.109201	0.019792	0.308131	0.57883	0.0936279	0.759615	0.0176215	0.894394	0	0	0	0	0	0
rs992398	4:18238836	p15.31	C/T	LCORL	0.66 (0.56 - 0.77)	-0.417689	0.0809115	2.96118e-07	0.91 (0.78 - 1.06)	-0.093995	0.0771223	0.248187	1.31 (1.05 - 1.62)	0.268656	0.109799	0.0168854	0.374768	0.540417	0.104082	0.746985	0.0250309	0.87429	0	0	0	0	0	0
rs992397	4:18238878	p15.31	G/A	LCORL	0.66 (0.56 - 0.77)	-0.417623	0.0809056	2.96761e-07	0.91 (0.78 - 1.06)	-0.0940192	0.0771175	0.248028	1.31 (1.05 - 1.62)	0.268572	0.109792	0.0169131	0.374114	0.54077	0.104044	0.74703	0.0249361	0.874526	0	0	0	0	0	0
rs2202300	4:18238933	p15.31	T/G	LCORL	0.67 (0.57 - 0.78)	-0.406687	0.0802661	4.88938e-07	0.91 (0.78 - 1.06)	-0.0921156	0.0768944	0.256795	1.30 (1.05 - 1.61)	0.26009	0.109149	0.020085	0.303374	0.581775	0.0945168	0.758512	0.0165742	0.897563	0	0	0	0	0	0
rs10593350	4:18239362	p15.31	T/TAGTC	LCORL	0.67 (0.57 - 0.78)	-0.403161	0.0801688	5.99084e-07	0.90 (0.77 - 1.04)	-0.106809	0.0766903	0.184029	1.27 (1.03 - 1.58)	0.242489	0.10895	0.0302959	0.263315	0.607852	0.0825966	0.773809	0.0163907	0.898128	0	0	0	0	0	0
rs1604786	4:18239824	p15.31	G/T	LCORL	0.67 (0.57 - 0.78)	-0.402729	0.0801308	6.09646e-07	0.90 (0.77 - 1.04)	-0.107004	0.0766587	0.183	1.27 (1.03 - 1.58)	0.241907	0.108903	0.0306344	0.259065	0.610763	0.0839317	0.772038	0.0152788	0.901626	0	0	0	0	0	0
rs7682684	4:18240563	p15.31	A/G	LCORL	0.67 (0.57 - 0.78)	-0.402401	0.0801028	6.18008e-07	0.90 (0.77 - 1.04)	-0.107134	0.0766411	0.182335	1.27 (1.03 - 1.58)	0.241492	0.108874	0.0308848	0.255699	0.61309	0.0832066	0.772998	0.0149197	0.902783	0	0	0	0	0	0
rs1394081	4:18240950	p15.31	C/T	LCORL	0.67 (0.57 - 0.78)	-0.404186	0.0800629	5.39328e-07	0.91 (0.78 - 1.06)	-0.0933249	0.0767271	0.249193	1.29 (1.04 - 1.60)	0.256643	0.108899	0.0215418	0.281147	0.59595	0.0988735	0.753186	0.0120486	0.912595	0	0	0	0	0	0
rs1394080	4:18241023	p15.31	T/G	LCORL	0.67 (0.57 - 0.78)	-0.404273	0.0800713	5.37604e-07	0.91 (0.78 - 1.06)	-0.0933375	0.0767284	0.249135	1.29 (1.04 - 1.60)	0.256714	0.108906	0.0215136	0.281717	0.595578	0.0967047	0.75582	0.0126818	0.910337	0	0	0	0	0	0
rs371703600	4:18241125	p15.31	GT4/G	LCORL	0.68 (0.58 - 0.79)	-0.387471	0.0793477	1.27802e-06	0.92 (0.80 - 1.07)	-0.0782217	0.0762834	0.335701	1.30 (1.05 - 1.60)	0.259007	0.108262	0.0195773	0.86578	0.352126	0.0811613	0.77573	0.181279	0.670277	0	0	0	0	0	0
rs6830099	4:18241526	p15.31	G/T	LCORL	0.67 (0.57 - 0.78)	-0.404548	0.0801014	5.33079e-07	0.91 (0.78 - 1.06)	-0.0933651	0.0767302	0.248999	1.29 (1.04 - 1.60)	0.256943	0.108927	0.0214196	0.285	0.593443	0.0901706	0.76396	0.0149897	0.902556	0	0	0	0	0	0
rs993297	4:18242597	p15.31	T/C	LCORL	0.67 (0.58 - 0.79)	-0.394338	0.079693	9.11001e-07	0.89 (0.76 - 1.03)	-0.120508	0.076163	0.128901	1.25 (1.01 - 1.54)	0.220185	0.108179	0.0483423	0.351998	0.552984	0.0367209	0.848034	0.0707023	0.790317	0	0	0	0	0	0
rs6811915	4:18243314	p15.31	T/G	LCORL	0.67 (0.58 - 0.79)	-0.394906	0.0797375	8.90063e-07	0.89 (0.77 - 1.04)	-0.113974	0.076277	0.152686	1.26 (1.02 - 1.55)	0.227384	0.108295	0.0414328	0.365471	0.545484	0.0554739	0.813798	0.0551995	0.814251	0	0	0	0	0	0
rs1503891	4:18243597	p15.31	C/T	LCORL	0.68 (0.59 - 0.80)	-0.380099	0.077009	9.73745e-07	0.88 (0.76 - 1.02)	-0.125279	0.0738301	0.102347	1.23 (1.00 - 1.51)	0.204091	0.104691	0.0590524	0.68856	0.406655	0.406864	0.523565	0.00795734	0.92892	0	0	0	0	0	0
rs741206	4:18243977	p15.31	A/G	LCORL	0.67 (0.57 - 0.78)	-0.398751	0.0798459	7.18965e-07	0.90 (0.77 - 1.04)	-0.106901	0.0763686	0.181701	1.27 (1.03 - 1.57)	0.237523	0.108417	0.0330838	0.401276	0.526431	0.0429924	0.83574	0.0735431	0.786246	0	0	0	0	0	0
rs741205	4:18244108	p15.31	T/C	LCORL	0.69 (0.60 - 0.80)	-0.370252	0.0741264	7.15879e-07	0.91 (0.80 - 1.05)	-0.0894477	0.0708586	0.230841	1.26 (1.03 - 1.53)	0.228141	0.100479	0.0270057	0.573282	0.448958	0.749877	0.386515	0.0306233	0.861084	0	0	0	0	0	0
rs6822218	4:18246160	p15.31	G/A	LCORL	0.67 (0.58 - 0.78)	-0.397371	0.0782963	4.66815e-07	0.89 (0.77 - 1.03)	-0.116617	0.0751702	0.136893	1.25 (1.02 - 1.55)	0.227064	0.106456	0.0382012	0.658683	0.417025	0.429629	0.512171	0.00147214	0.969394	0	0	0	0	0	0
rs6822229	4:18246174	p15.31	G/A	LCORL	0.66 (0.56 - 0.77)	-0.414742	0.0811735	3.91848e-07	0.90 (0.77 - 1.04)	-0.110803	0.0775488	0.172386	1.28 (1.03 - 1.59)	0.246978	0.110105	0.0289794	0.314372	0.57501	0.0435862	0.834625	0.0420837	0.83746	0	0	0	0	0	0
rs2320568	4:18246528	p15.31	G/A	LCORL	0.67 (0.57 - 0.78)	-0.405625	0.0803936	5.48313e-07	0.90 (0.77 - 1.04)	-0.107585	0.0767707	0.181184	1.28 (1.03 - 1.58)	0.2439	0.109159	0.0296341	0.265145	0.606607	0.0655982	0.797857	0.0230928	0.879216	0	0	0	0	0	0
rs2320569	4:18246582	p15.31	T/C	LCORL	0.67 (0.57 - 0.79)	-0.397292	0.0799611	8.17165e-07	0.89 (0.76 - 1.03)	-0.120626	0.0763817	0.12966	1.25 (1.01 - 1.55)	0.222627	0.10851	0.0465049	0.362028	0.547382	0.033791	0.854152	0.0769233	0.781511	0	0	0	0	0	0
rs2320570	4:18246715	p15.31	G/T	LCORL	0.67 (0.57 - 0.78)	-0.405824	0.0804161	5.44963e-07	0.90 (0.77 - 1.04)	-0.107493	0.0767923	0.181705	1.28 (1.03 - 1.58)	0.244162	0.109189	0.0294995	0.265097	0.60664	0.0660601	0.797162	0.0229048	0.879705	0	0	0	0	0	0
rs7671194	4:18246791	p15.31	C/A	LCORL	0.67 (0.57 - 0.78)	-0.400461	0.0800431	6.8734e-07	0.90 (0.77 - 1.04)	-0.106927	0.0765664	0.182778	1.27 (1.03 - 1.57)	0.238985	0.108688	0.0324268	0.402764	0.525665	0.0438745	0.834087	0.0732075	0.786723	0	0	0	0	0	0
rs5856458	4:18247485	p15.31	GA/G	LCORL	0.66 (0.57 - 0.78)	-0.407981	0.0804985	4.85093e-07	0.91 (0.78 - 1.06)	-0.0947239	0.0769595	0.243304	1.30 (1.05 - 1.60)	0.258654	0.109355	0.0210566	0.35168	0.553164	0.0629388	0.80191	0.0391145	0.843222	0	0	0	0	0	0
rs887917	4:18247661	p15.31	A/C	LCORL	0.67 (0.58 - 0.79)	-0.396303	0.0801158	9.18777e-07	0.88 (0.76 - 1.03)	-0.122249	0.0764919	0.124919	1.25 (1.01 - 1.54)	0.219771	0.108679	0.0498699	0.337893	0.561048	0.036034	0.849445	0.0669774	0.79579	0	0	0	0	0	0
rs887916	4:18248134	p15.31	T/C	LCORL	0.67 (0.57 - 0.79)	-0.397945	0.0800494	8.05639e-07	0.89 (0.76 - 1.03)	-0.120519	0.0764722	0.130493	1.25 (1.01 - 1.55)	0.223282	0.108633	0.0460961	0.362487	0.547128	0.0340236	0.853657	0.076812	0.781665	0	0	0	0	0	0
rs6836407	4:18248416	p15.31	T/A	LCORL	0.67 (0.57 - 0.78)	-0.406516	0.0804999	5.34615e-07	0.90 (0.77 - 1.04)	-0.107401	0.0768794	0.182621	1.28 (1.03 - 1.58)	0.24484	0.109306	0.0292145	0.264627	0.606959	0.0659435	0.797337	0.0228532	0.879839	0	0	0	0	0	0
rs1503890	4:18248942	p15.31	T/C	LCORL	0.67 (0.57 - 0.79)	-0.398321	0.0801052	8.00495e-07	0.89 (0.76 - 1.03)	-0.120468	0.0765284	0.13096	1.25 (1.01 - 1.55)	0.223662	0.10871	0.0458729	0.36395	0.546321	0.0330324	0.85578	0.0783771	0.779509	0	0	0	0	0	0
rs1354378	4:18249809	p15.31	G/A	LCORL	0.66 (0.57 - 0.78)	-0.410721	0.0806908	4.31332e-07	0.91 (0.78 - 1.06)	-0.0935025	0.0771693	0.251113	1.30 (1.05 - 1.61)	0.262304	0.109632	0.0195679	0.300795	0.583385	0.0826381	0.773754	0.020057	0.887378	0	0	0	0	0	0
rs2215878	4:18250013	p15.31	G/T	LCORL	0.67 (0.57 - 0.78)	-0.407775	0.0806599	5.19258e-07	0.90 (0.77 - 1.04)	-0.107232	0.0770413	0.184308	1.28 (1.03 - 1.59)	0.246073	0.109528	0.0287159	0.263741	0.607561	0.0637325	0.800691	0.0236452	0.877791	0	0	0	0	0	0
rs1394089	4:18250814	p15.31	A/G	LCORL	0.67 (0.57 - 0.78)	-0.399748	0.0802839	7.72846e-07	0.89 (0.76 - 1.03)	-0.120269	0.076709	0.132581	1.25 (1.01 - 1.55)	0.225033	0.108957	0.0450107	0.363716	0.54645	0.0323161	0.857336	0.0791823	0.778409	0	0	0	0	0	0
rs1394086	4:18250915	p15.31	A/G	LCORL	0.67 (0.57 - 0.78)	-0.399901	0.0803028	7.69911e-07	0.89 (0.76 - 1.03)	-0.120246	0.0767282	0.13276	1.25 (1.01 - 1.55)	0.225183	0.108983	0.0449156	0.364998	0.545743	0.0326124	0.85669	0.0792527	0.778313	0	0	0	0	0	0
rs36051375	4:18254821	p15.31	CT/C	LCORL	0.66 (0.56 - 0.77)	-0.42117	0.0805423	2.05208e-07	0.92 (0.79 - 1.06)	-0.0879083	0.0766573	0.278763	1.33 (1.07 - 1.64)	0.281719	0.109362	0.0117508	0.557651	0.455208	0.284806	0.593568	0.0109922	0.9165	0	0	0	0	0	0
rs2320571	4:18256682	p15.31	G/A	LCORL	0.66 (0.56 - 0.77)	-0.414438	0.081119	3.92508e-07	0.91 (0.78 - 1.06)	-0.0931214	0.0775909	0.255874	1.30 (1.05 - 1.62)	0.265907	0.110218	0.0185392	0.30506	0.580727	0.0869112	0.768141	0.0194042	0.889214	0	0	0	0	0	0
rs4698224	4:18259934	p15.31	C/T	LCORL	0.68 (0.58 - 0.79)	-0.385566	0.079355	1.44972e-06	0.90 (0.78 - 1.04)	-0.10573	0.0759436	0.184197	1.26 (1.02 - 1.55)	0.227481	0.107774	0.0403354	0.944771	0.331054	0.0593683	0.807497	0.205982	0.649935	0	0	0	0	0	0
rs4698225	4:18260113	p15.31	C/T	LCORL	0.67 (0.57 - 0.78)	-0.405675	0.0796008	4.19135e-07	0.93 (0.80 - 1.08)	-0.0759062	0.0762495	0.350733	1.32 (1.06 - 1.63)	0.275069	0.108241	0.0129742	0.410958	0.521484	0.219138	0.639697	0.00214708	0.963042	0	0	0	0	0	0
rs6857849	4:18260589	p15.31	G/C	LCORL	0.67 (0.57 - 0.78)	-0.402592	0.0795858	5.109e-07	0.92 (0.79 - 1.06)	-0.08842	0.0761744	0.272648	1.30 (1.05 - 1.60)	0.259793	0.10818	0.0191044	0.363963	0.546313	0.186307	0.666008	0.00333518	0.953947	0	0	0	0	0	0
rs4698678	4:18260776	p15.31	G/C	LCORL	0.67 (0.58 - 0.79)	-0.39355	0.079079	7.83078e-07	0.90 (0.78 - 1.05)	-0.101511	0.0758159	0.202434	1.27 (1.03 - 1.57)	0.238227	0.107519	0.0310757	0.493486	0.482376	0.135487	0.712809	0.0322633	0.857451	0	0	0	0	0	0
rs2320572	4:18261220	p15.31	G/A	LCORL	0.66 (0.56 - 0.77)	-0.416813	0.0813963	3.68787e-07	0.91 (0.78 - 1.06)	-0.0926222	0.0778549	0.260258	1.31 (1.05 - 1.62)	0.268457	0.110593	0.0178035	0.306999	0.579528	0.0898228	0.764403	0.0188914	0.890678	0	0	0	0	0	0
rs7688502	4:18261775	p15.31	G/A	LCORL	0.67 (0.57 - 0.78)	-0.403002	0.0796361	5.05612e-07	0.92 (0.79 - 1.06)	-0.0882642	0.076225	0.273873	1.30 (1.05 - 1.60)	0.260282	0.10825	0.0189509	0.362461	0.547142	0.186469	0.665872	0.00323082	0.954672	0	0	0	0	0	0
rs4259061	4:18261994	p15.31	G/A	LCORL	0.67 (0.58 - 0.78)	-0.398295	0.0778063	3.72189e-07	0.94 (0.81 - 1.08)	-0.0670342	0.0742282	0.399755	1.32 (1.07 - 1.62)	0.275286	0.10544	0.0106294	0.26017	0.610003	0.338327	0.560797	0.0218829	0.882399	0	0	0	0	0	0
rs4698679	4:18262425	p15.31	T/C	LCORL	0.68 (0.58 - 0.79)	-0.389469	0.0773163	5.7362e-07	0.92 (0.80 - 1.07)	-0.0801641	0.0738787	0.306864	1.29 (1.05 - 1.58)	0.253837	0.10479	0.0180534	0.350781	0.553671	0.295687	0.586599	0.00293089	0.956825	0	0	0	0	0	0
rs13113478	4:18262623	p15.31	A/G	LCORL	0.67 (0.57 - 0.78)	-0.406383	0.0809572	6.31747e-07	0.90 (0.77 - 1.05)	-0.106163	0.077515	0.19179	1.28 (1.03 - 1.58)	0.24452	0.109979	0.0304772	0.33891	0.560459	0.0512439	0.820913	0.0497203	0.823551	0	0	0	0	0	0
A1: effect allele; A2: non-effect allele; Chr: chromosome; CI: confidence interval; OR: odds ratio; pos: position; p: p-value; Q: Cochran's Q ; SE: standard error
Statistically significant associations are highlighted in bold.
a Coordinates are referred to the GRCh37 reference genome.
b Subindexes refers to the repetition of a particular nucleotide in the specified allele.

## Sheet: Table_S4
Table S4. Enrichment analysis results for the genes regulated by significant/suggestive variants in females and males
Sex	Enrichment process	#term ID	Sign	Term description	OGC	BGC	Strength	FDR	Gene name
Male	Component	GO:0031225		anchored component of membrane	7	156	0.86	0.0038	RAB35,GAS1,CA4,ART3,NEGR1,NTNG1,EFNA4
Male	Component	GO:0071944		cell periphery	54	5254	0.22	0.002	CX3CL1,ICAM3,MPP6,RAB35,NRBP1,C2orf40,CD97,IGFLR1,FOLH1,DSG1,RGS8,FGF10,ZAP70,PIK3C2A,LRRTM2,TNFSF4,GRID2,FGFR4,ITGA5,CXCL16,PRKCI,GAS1,CA4,SEMA4C,PCDHB1,CDK5R1,IL3RA,IFNL1,DUSP15,CDH5,SCARA5,ART3,NEGR1,ADSS,DLL1,IGSF9,S100A6,VAV3,NTNG1,ROR1,ERMAP,EDA,ANXA1,KIAA0319,EDA2R,IL15RA,MRAP,COLEC12,IL18R1,LTB,EFNA4,DBNL,PARK7,PCDHA4
Male	Component	GO:0005576		extracellular region	38	2505	0.39	2.47e-05	CX3CL1,CCL1,RAB35,C2orf40,INHBA,CD97,KLK12,MIA,FGF10,PROK1,SFRP2,TNFSF4,ADAMTS1,WIF1,FGFR4,CXCL16,PRKCI,CA4,WFIKKN2,IFNL1,ENTPD5,IL17F,TSLP,ART3,NEGR1,CLPSL2,DLL1,NTNG1,EDA,ANXA1,MMEL1,IL15RA,IL18BP,LTB,COLEC11,EFNA4,DBNL,PPIA
Male	Component	GO:0005615		extracellular space	21	1134	0.48	0.00098	CX3CL1,CCL1,C2orf40,INHBA,CD97,KLK12,MIA,FGF10,SFRP2,TNFSF4,CXCL16,CA4,WFIKKN2,IFNL1,IL17F,TSLP,ANXA1,IL15RA,IL18BP,LTB,COLEC11
Male	Component	GO:0016020		membrane	72	8420	0.14	0.0095	CX3CL1,ICAM3,SGTA,MPP6,RAB35,NRBP1,C2orf40,CD97,IGFLR1,DNAJB9,FOLH1,DSG1,RGS8,IER3,FGF10,ZAP70,PIK3C2A,SFRP2,LRRTM2,TNFSF4,GRID2,FGFR4,ITGA5,CXCL16,PRKCI,GAS1,STAT6,CA4,SEMA4C,PCDHB1,CDK5R1,IL3RA,SLC25A18,IFNL1,MGAT4B,DUSP15,CDH5,SCARA5,ART3,C3orf18,NEGR1,ADSS,DLL1,IGSF9,S100A6,VAV3,NTNG1,ROR1,ERMAP,RABEPK,EDA,ANXA1,KIAA0319,MMEL1,BCAP29,DNAJC19,ERO1L,EDA2R,IL15RA,MRAP,COLEC12,IL18R1,HEPACAM2,CHS…
Male	Component	GO:0005886		plasma membrane	53	5159	0.22	0.002	CX3CL1,ICAM3,MPP6,RAB35,C2orf40,CD97,IGFLR1,FOLH1,DSG1,RGS8,FGF10,ZAP70,PIK3C2A,LRRTM2,TNFSF4,GRID2,FGFR4,ITGA5,CXCL16,PRKCI,GAS1,CA4,SEMA4C,PCDHB1,CDK5R1,IL3RA,IFNL1,DUSP15,CDH5,SCARA5,ART3,NEGR1,ADSS,DLL1,IGSF9,S100A6,VAV3,NTNG1,ROR1,ERMAP,EDA,ANXA1,KIAA0319,EDA2R,IL15RA,MRAP,COLEC12,IL18R1,LTB,EFNA4,DBNL,PARK7,PCDHA4
Male	Function	GO:0005125		cytokine activity	9	216	0.83	0.00085	CX3CL1,CCL1,INHBA,TNFSF4,CXCL16,IFNL1,IL17F,TSLP,LTB
Male	Function	GO:0005126		cytokine receptor binding	12	272	0.85	2.4e-05	CX3CL1,CCL1,INHBA,STAP1,TNFSF4,ITGA5,CXCL16,IFNL1,IL17F,TSLP,EDA,LTB
Male	Function	GO:0098772		molecular function regulator	27	1793	0.39	0.00087	CX3CL1,CCL1,C2orf40,INHBA,RGS8,MIA,FGF10,PROK1,SFRP2,TNFSF4,FGFR4,CXCL16,WFIKKN2,CDK5R1,IL3RA,IFNL1,IL17F,TSLP,CLPSL2,VAV3,BCAR3,EDA,ANXA1,IL18BP,LTB,DBNL,PARK7
Male	Function	GO:0005515		protein binding	69	6607	0.23	2.4e-05	CX3CL1,ICAM3,TOX3,RIPK2,RELB,SGTA,MPP6,CCL1,TPI1,NRBP1,C2orf40,INHBA,DNAJB9,CSNK1G2,DSG1,DCUN1D5,MLYCD,MIA,FGF10,ZAP70,STAP1,PROK1,SFRP2,LRRTM2,TNFSF4,GRID2,WIF1,FGFR4,ITGA5,CXCL16,PRKCI,STAT6,WFIKKN2,ZHX3,HNF4A,UBE2N,CDK5R1,IL3RA,IFNL1,IL17F,UBE2G2,TSLP,CDH5,DLL1,PARP1,IGSF9,CLK2,S100A6,VAV3,NTNG1,BCAR3,ROR1,EDA,ANXA1,TGFB1I1,MRAP,IL18BP,IL18R1,TKT,ANAPC7,LTB,EFNA4,TRA2B,DBNL,PARK7,PPIA,TAGLN,PC…
Male	Function	GO:0004713		protein tyrosine kinase activity	8	180	0.86	0.0013	RIPK2,FGF10,ZAP70,FGFR4,IL3RA,CLK2,ROR1,EFNA4
Male	Function	GO:0048018		receptor ligand activity	15	458	0.72	2.4e-05	CX3CL1,CCL1,C2orf40,INHBA,MIA,FGF10,PROK1,SFRP2,TNFSF4,CXCL16,IFNL1,IL17F,TSLP,EDA,LTB
Male	Function	GO:0030545		receptor regulator activity	17	483	0.76	2.72e-06	CX3CL1,CCL1,C2orf40,INHBA,MIA,FGF10,PROK1,SFRP2,TNFSF4,CXCL16,WFIKKN2,IFNL1,IL17F,TSLP,EDA,IL18BP,LTB
Male	Function	GO:0005102		signaling receptor binding	35	1513	0.57	3.03e-09	CX3CL1,ICAM3,RIPK2,CCL1,C2orf40,INHBA,MLYCD,MIA,FGF10,ZAP70,STAP1,PROK1,SFRP2,LRRTM2,TNFSF4,ITGA5,CXCL16,WFIKKN2,HNF4A,CDK5R1,IFNL1,IL17F,TSLP,CDH5,DLL1,PARP1,VAV3,EDA,ANXA1,TGFB1I1,MRAP,IL18BP,LTB,EFNA4,PARK7
Male	KEGG	hsa04060		Cytokine-cytokine receptor interaction	13	263	0.9	1.69e-06	CX3CL1,CCL1,INHBA,TNFSF4,CXCL16,IL3RA,IFNL1,IL17F,TSLP,EDA,EDA2R,IL18R1,LTB
Male	Keyword	KW-0106		Calcium	15	872	0.44	0.0083	CD97,FOLH1,DSG1,ADAMTS1,ITGA5,PCDHB1,RCN2,ENTPD5,CDH5,S100A6,ANXA1,COLEC12,TKT,COLEC11,PCDHA4
Male	Keyword	KW-1003		Cell membrane	37	3214	0.27	0.0031	CX3CL1,RAB35,C2orf40,CD97,IGFLR1,FOLH1,DSG1,RGS8,ZAP70,PIK3C2A,LRRTM2,GRID2,FGFR4,CXCL16,GAS1,CA4,SEMA4C,PCDHB1,CDK5R1,DUSP15,CDH5,SCARA5,ART3,NEGR1,DLL1,IGSF9,S100A6,NTNG1,ERMAP,EDA,ANXA1,KIAA0319,MRAP,EFNA4,DBNL,PARK7,PCDHA4
Male	Keyword	KW-0202		Cytokine	8	185	0.84	0.0011	CX3CL1,CCL1,TNFSF4,CXCL16,IFNL1,IL17F,TSLP,LTB
Male	Keyword	KW-1015		Disulfide bond	49	3284	0.38	7.04e-08	CX3CL1,ICAM3,CCL1,INHBA,CD97,KLK12,MLYCD,MIA,PROK1,SFRP2,TNFSF4,GRID2,ADAMTS1,WIF1,FGFR4,ITGA5,CXCL16,CA4,SEMA4C,WFIKKN2,UBE2N,OLFML3,IFNL1,ENTPD5,IL17F,TSLP,SCARA5,ART3,NEGR1,CLPSL2,DLL1,IGSF9,NTNG1,ROR1,ERMAP,ANXA1,MMEL1,ERO1L,EDA2R,IL15RA,COLEC12,IL18BP,IL18R1,HEPACAM2,CHST15,COLEC11,EFNA4,PCDHA4,SPON1
Male	Keyword	KW-0325		Glycoprotein	55	4352	0.31	1.06e-06	CX3CL1,ICAM3,CCL1,INHBA,CD97,KLK12,FOLH1,DSG1,IER3,FGF10,LRRTM2,TNFSF4,GRID2,ADAMTS1,WIF1,FGFR4,ITGA5,CXCL16,GAS1,CA4,SEMA4C,PCDHB1,WFIKKN2,OLFML3,IL3RA,IFNL1,ENTPD5,IL17F,MGAT4B,TSLP,CDH5,SCARA5,ART3,NEGR1,DLL1,IGSF9,NTNG1,ROR1,ERMAP,EDA,KIAA0319,MMEL1,ERO1L,EDA2R,COLEC12,IL18BP,IL18R1,HEPACAM2,CHST15,LTB,PSMA1,EFNA4,PPIA,PCDHA4,SPON1
Male	Keyword	KW-0336		GPI-anchor	6	137	0.85	0.0067	GAS1,CA4,ART3,NEGR1,NTNG1,EFNA4
Male	Keyword	KW-0393		Immunoglobulin domain	11	448	0.6	0.0038	ICAM3,FGFR4,SEMA4C,WFIKKN2,NEGR1,IGSF9,ROR1,ERMAP,IL18BP,IL18R1,HEPACAM2
Male	Keyword	KW-0964		Secreted	29	1814	0.41	8.93e-05	CX3CL1,CCL1,C2orf40,INHBA,CD97,KLK12,MIA,FGF10,PROK1,SFRP2,ADAMTS1,WIF1,FGFR4,CXCL16,WFIKKN2,OLFML3,IFNL1,ENTPD5,IL17F,TSLP,CLPSL2,EDA,ANXA1,MMEL1,IL18BP,COLEC11,EFNA4,PPIA,SPON1
Male	Keyword	KW-0732		Signal	51	3236	0.41	6.63e-09	CX3CL1,ICAM3,CCL1,C2orf40,INHBA,CD97,IGFLR1,DNAJB9,KLK12,DSG1,MIA,FGF10,PROK1,SFRP2,LRRTM2,GRID2,ADAMTS1,WIF1,FGFR4,ITGA5,CXCL16,GAS1,CA4,SEMA4C,PCDHB1,WFIKKN2,RCN2,OLFML3,IL3RA,IFNL1,ENTPD5,IL17F,TSLP,CDH5,ART3,NEGR1,CLPSL2,DLL1,IGSF9,NTNG1,ROR1,ERMAP,KIAA0319,ERO1L,IL18BP,IL18R1,HEPACAM2,COLEC11,EFNA4,PCDHA4,SPON1
Male	Process	GO:0002250		adaptive immune response	8	280	0.66	0.0096	RIPK2,RELB,ZAP70,STAT6,ANXA1,IL18BP,IL18R1,DBNL
Male	Process	GO:0046631		alpha-beta T cell activation	6	60	1.21	0.00028	RELB,ZAP70,TNFSF4,STAT6,ANXA1,IL18R1
Male	Process	GO:0046632		alpha-beta T cell differentiation	5	50	1.21	0.0013	RELB,ZAP70,STAT6,ANXA1,IL18R1
Male	Process	GO:0035710		CD4-(+), alpha-beta T cell activation	4	37	1.24	0.0039	RELB,TNFSF4,STAT6,IL18R1
Male	Process	GO:0006955		immune response	22	1560	0.36	0.0063	CX3CL1,RIPK2,RELB,CCL1,CD97,DSG1,ZAP70,TNFSF4,CXCL16,STAT6,IFNL1,TSLP,DLL1,EDA,ANXA1,COLEC12,IL18BP,IL18R1,LTB,COLEC11,DBNL,PPIA
Male	Process	GO:0002376		immune system process	35	2370	0.38	7e-05	CX3CL1,ICAM3,RIPK2,RELB,CCL1,RAB35,INHBA,CD97,DNAJB9,DSG1,FGF10,ZAP70,SFRP2,TNFSF4,ITGA5,CXCL16,STAT6,UBE2N,IFNL1,TSLP,ADSS,DLL1,PARP1,VAV3,EDA,ANXA1,COLEC12,IL18BP,IL18R1,LTB,COLEC11,PSMA1,EFNA4,DBNL,PPIA
Male	Process	GO:0002521		leukocyte differentiation	9	313	0.67	0.0052	RELB,DNAJB9,ZAP70,STAT6,DLL1,PARP1,ANXA1,IL18R1,EFNA4
Male	Process	GO:0007275		multicellular organism development	54	4726	0.27	7.6e-05	CX3CL1,RELB,TPI1,RAB35,C2orf40,INHBA,DNAJB9,KLK12,DSG1,FGF10,ZAP70,STAP1,PROK1,SFRP2,GRID2,ADAMTS1,WIF1,ITGA5,PRKCI,STAT6,SEMA4C,PCDHB1,WFIKKN2,CDK5R1,OLFML3,IL17F,CDH5,NEGR1,DLL1,PARP1,IGSF9,S100A6,VAV3,NTNG1,BCAR3,ROR1,EDA,ANXA1,KIAA0319,HMGN1,DNAJC19,TGFB1I1,ERO1L,EDA2R,PAXIP1,IL18R1,CA10,LTB,COLEC11,EFNA4,TRA2B,DBNL,TAGLN,PCDHA4
Male	Process	GO:0002824	(+)	regulation of adaptive immune response based on somatic recombination of immune receptors built from immunoglobulin superfamily domains	6	89	1.04	0.0014	RIPK2,TNFSF4,STAT6,ANXA1,PAXIP1,IL18R1
Male	Process	GO:0046638	(+)	regulation of alpha-beta T cell differentiation	4	45	1.16	0.0063	RIPK2,ZAP70,TNFSF4,ANXA1
Male	Process	GO:0046641	(+)	regulation of alpha-beta T cell proliferation	3	18	1.43	0.0072	RIPK2,ZAP70,TNFSF4
Male	Process	GO:0048518	(+)	regulation of biological process	60	5459	0.25	5.3e-05	CX3CL1,ICAM3,TOX3,RIPK2,RELB,SGTA,CCL1,C2orf40,INHBA,DCUN1D5,MLYCD,FGF10,ZAP70,STAP1,PIK3C2A,PROK1,SFRP2,LRRTM2,TNFSF4,GRID2,ADAMTS1,WIF1,FGFR4,ITGA5,CXCL16,PRKCI,STAT6,SEMA4C,ZHX3,HNF4A,UBE2N,CDK5R1,IFNL1,ENTPD5,IL17F,TSLP,DUSP15,CDH5,NEGR1,DLL1,PARP1,S100A6,VAV3,BCAR3,ROR1,EDA,ANXA1,HMGN1,TGFB1I1,EDA2R,MRAP,COLEC12,PAXIP1,IL18R1,LTB,COLEC11,TRA2B,DBNL,PARK7,PPIA
Male	Process	GO:0031347		regulation of defense response	13	676	0.49	0.008	CX3CL1,ICAM3,RIPK2,RELB,STAP1,TNFSF4,UBE2N,IL17F,TSLP,CDH5,ANXA1,COLEC12,PARK7
Male	Process	GO:0031349	(+)	regulation of defense response	11	365	0.69	0.0013	CX3CL1,ICAM3,RIPK2,RELB,STAP1,TNFSF4,UBE2N,IL17F,TSLP,COLEC12,PARK7
Male	Process	GO:0050778	(+)	regulation of immune response	16	589	0.64	9.3e-05	ICAM3,RIPK2,RELB,ZAP70,STAP1,TNFSF4,STAT6,UBE2N,IFNL1,VAV3,ANXA1,COLEC12,PAXIP1,IL18R1,COLEC11,PARK7
Male	Process	GO:0002682		regulation of immune system process	21	1391	0.39	0.0042	ICAM3,RIPK2,RELB,CCL1,INHBA,FGF10,ZAP70,STAP1,TNFSF4,STAT6,UBE2N,IFNL1,TSLP,DLL1,VAV3,ANXA1,COLEC12,PAXIP1,IL18R1,COLEC11,PARK7
Male	Process	GO:0002684	(+)	regulation of immune system process	20	882	0.56	6.83e-05	ICAM3,RIPK2,RELB,CCL1,INHBA,FGF10,ZAP70,STAP1,TNFSF4,STAT6,UBE2N,IFNL1,TSLP,VAV3,ANXA1,COLEC12,PAXIP1,IL18R1,COLEC11,PARK7
Male	Process	GO:0050729	(+)	regulation of inflammatory response	6	120	0.91	0.0041	CX3CL1,STAP1,TNFSF4,IL17F,TSLP,PARK7
Male	Process	GO:0032649		regulation of interferon-gamma production	5	97	0.92	0.0096	RIPK2,INHBA,TNFSF4,IFNL1,IL18R1
Male	Process	GO:0032656		regulation of interleukin-13 production	3	21	1.36	0.0096	TNFSF4,IFNL1,TSLP
Male	Process	GO:0002694		regulation of leukocyte activation	12	470	0.62	0.0018	RIPK2,INHBA,FGF10,ZAP70,STAP1,TNFSF4,STAT6,IFNL1,TSLP,VAV3,ANXA1,PAXIP1
Male	Process	GO:0002696	(+)	regulation of leukocyte activation	10	298	0.73	0.0013	RIPK2,FGF10,ZAP70,STAP1,TNFSF4,STAT6,TSLP,VAV3,ANXA1,PAXIP1
Male	Process	GO:0051249		regulation of lymphocyte activation	10	401	0.61	0.0063	RIPK2,INHBA,FGF10,ZAP70,TNFSF4,STAT6,IFNL1,VAV3,ANXA1,PAXIP1
Male	Process	GO:0051251	(+)	regulation of lymphocyte activation	8	260	0.7	0.0067	RIPK2,FGF10,ZAP70,TNFSF4,STAT6,VAV3,ANXA1,PAXIP1
Male	Process	GO:0045620	(-)	regulation of lymphocyte differentiation	4	49	1.12	0.0079	INHBA,TNFSF4,IFNL1,ANXA1
Male	Process	GO:0050671	(+)	regulation of lymphocyte proliferation	6	130	0.87	0.0057	RIPK2,FGF10,ZAP70,TNFSF4,VAV3,ANXA1
Male	Process	GO:0051239		regulation of multicellular organismal process	35	2788	0.31	0.0014	CX3CL1,RIPK2,RELB,C2orf40,INHBA,FGF10,ZAP70,STAP1,PIK3C2A,PROK1,SFRP2,LRRTM2,TNFSF4,GRID2,ITGA5,PRKCI,STAT6,ZHX3,HNF4A,CDK5R1,IFNL1,IL17F,TSLP,CDH5,NEGR1,DLL1,PARP1,ROR1,ANXA1,KIAA0319,TGFB1I1,PAXIP1,IL18R1,LTB,PARK7
Male	Process	GO:0051240	(+)	regulation of multicellular organismal process	28	1551	0.47	3.48e-05	CX3CL1,RIPK2,C2orf40,INHBA,FGF10,ZAP70,PIK3C2A,SFRP2,LRRTM2,TNFSF4,GRID2,ITGA5,PRKCI,STAT6,ZHX3,IFNL1,IL17F,TSLP,CDH5,NEGR1,DLL1,PARP1,ANXA1,TGFB1I1,PAXIP1,IL18R1,LTB,PARK7
Male	Process	GO:0051092	(+)	regulation of NF-kappaB transcription factor activity	7	142	0.9	0.0017	RIPK2,PRKCI,UBE2N,ROR1,EDA,EDA2R,IL18R1
Male	Process	GO:0045625		regulation of T-helper 1 cell differentiation	3	10	1.69	0.0025	RIPK2,TNFSF4,ANXA1
Male	Process	GO:0002825		regulation of T-helper 1 type immune response	4	26	1.4	0.0017	RIPK2,TNFSF4,ANXA1,IL18R1
Male	Process	GO:0002827	(+)	regulation of T-helper 1 type immune response	3	19	1.41	0.008	RIPK2,ANXA1,IL18R1
Male	Process	GO:0045624	(+)	regulation of T-helper cell differentiation	3	21	1.36	0.0096	RIPK2,TNFSF4,ANXA1
Male	Process	GO:0002828		regulation of type 2 immune response	4	30	1.33	0.0023	TNFSF4,STAT6,IFNL1,ANXA1
Male	Process	GO:0002829	(-)	regulation of type 2 immune response	3	14	1.54	0.0045	STAT6,IFNL1,ANXA1
Male	Process	GO:0070555		response to interleukin-1	6	147	0.82	0.0089	CX3CL1,RIPK2,CCL1,PRKCI,UBE2N,ANXA1
Male	Process	GO:0070673		response to interleukin-18	3	10	1.69	0.0025	RIPK2,IL18BP,IL18R1
Male	Process	GO:0045063		T-helper 1 cell differentiation	3	8	1.78	0.0017	RELB,STAT6,IL18R1
Male	Process	GO:0042088		T-helper 1 type immune response	4	19	1.53	0.00074	RELB,STAT6,IL18BP,IL18R1
Male	Process	GO:0048856		anatomical structure development	55	5085	0.24	0.00028	CX3CL1,RELB,TPI1,RAB35,C2orf40,INHBA,DNAJB9,KLK12,DSG1,IER3,FGF10,ZAP70,STAP1,PROK1,SFRP2,GRID2,ADAMTS1,WIF1,ITGA5,PRKCI,STAT6,SEMA4C,PCDHB1,WFIKKN2,CDK5R1,OLFML3,IL17F,CDH5,NEGR1,DLL1,PARP1,IGSF9,S100A6,VAV3,NTNG1,BCAR3,ROR1,EDA,ANXA1,KIAA0319,HMGN1,DNAJC19,TGFB1I1,ERO1L,EDA2R,PAXIP1,IL18R1,CA10,LTB,COLEC11,EFNA4,TRA2B,DBNL,TAGLN,PCDHA4
Male	Process	GO:0030154		cell differentiation	38	3457	0.25	0.0054	CX3CL1,RELB,RAB35,INHBA,DNAJB9,KLK12,DSG1,FGF10,ZAP70,STAP1,SFRP2,GRID2,ITGA5,PRKCI,GAS1,STAT6,SEMA4C,WFIKKN2,ZHX3,CDK5R1,NEGR1,DLL1,PARP1,IGSF9,S100A6,NTNG1,ROR1,EDA,ANXA1,KIAA0319,TGFB1I1,ERO1L,EDA2R,PAXIP1,IL18R1,EFNA4,DBNL,TAGLN
Male	Process	GO:0016477		cell migration	16	812	0.5	0.002	CX3CL1,CCL1,FGF10,ZAP70,PIK3C2A,FGFR4,ITGA5,CXCL16,PRKCI,SEMA4C,CDK5R1,VAV3,ANXA1,KIAA0319,PAXIP1,PPIA
Male	Process	GO:0048869		cellular developmental process	39	3533	0.25	0.0042	CX3CL1,RELB,RAB35,C2orf40,INHBA,DNAJB9,KLK12,DSG1,FGF10,ZAP70,STAP1,SFRP2,GRID2,ITGA5,PRKCI,GAS1,STAT6,SEMA4C,WFIKKN2,ZHX3,CDK5R1,NEGR1,DLL1,PARP1,IGSF9,S100A6,NTNG1,ROR1,EDA,ANXA1,KIAA0319,TGFB1I1,ERO1L,EDA2R,PAXIP1,IL18R1,EFNA4,DBNL,TAGLN
Male	Process	GO:0032502		developmental process	58	5401	0.24	0.00016	CX3CL1,RELB,TPI1,RAB35,C2orf40,INHBA,DNAJB9,KLK12,DSG1,IER3,FGF10,ZAP70,STAP1,PROK1,SFRP2,GRID2,ADAMTS1,WIF1,ITGA5,PRKCI,GAS1,STAT6,SEMA4C,PCDHB1,WFIKKN2,ZHX3,HNF4A,CDK5R1,OLFML3,IL17F,CDH5,NEGR1,DLL1,PARP1,IGSF9,S100A6,VAV3,NTNG1,BCAR3,ROR1,EDA,ANXA1,KIAA0319,HMGN1,DNAJC19,TGFB1I1,ERO1L,EDA2R,PAXIP1,IL18R1,CA10,LTB,COLEC11,EFNA4,TRA2B,DBNL,TAGLN,PCDHA4
Male	Process	GO:0048534		hematopoietic or lymphoid organ development	13	573	0.56	0.0026	RELB,INHBA,DNAJB9,FGF10,ZAP70,SFRP2,STAT6,DLL1,PARP1,ANXA1,IL18R1,LTB,EFNA4
Male	Process	GO:0032501		multicellular organismal process	59	6507	0.17	0.0079	CX3CL1,RELB,TPI1,RAB35,C2orf40,INHBA,DNAJB9,KLK12,DSG1,FGF10,ZAP70,STAP1,PIK3C2A,PROK1,SFRP2,TNFSF4,GRID2,ADAMTS1,WIF1,ITGA5,PRKCI,STAT6,SEMA4C,PCDHB1,WFIKKN2,HNF4A,CDK5R1,OLFML3,IL17F,CDH5,NEGR1,CLPSL2,DLL1,PARP1,IGSF9,S100A6,VAV3,NTNG1,BCAR3,ROR1,EDA,ANXA1,KIAA0319,HMGN1,DNAJC19,TGFB1I1,ERO1L,EDA2R,PAXIP1,IL18R1,CA10,LTB,COLEC11,EFNA4,TRA2B,DBNL,PARK7,TAGLN,PCDHA4
Male	Process	GO:0045765		regulation of angiogenesis	9	277	0.72	0.0027	CX3CL1,PIK3C2A,PROK1,SFRP2,ITGA5,IL17F,CDH5,DLL1,ANXA1
Male	Process	GO:0045766	(+)	regulation of angiogenesis	7	162	0.84	0.0031	CX3CL1,PIK3C2A,SFRP2,ITGA5,CDH5,DLL1,ANXA1
Male	Process	GO:0042127		regulation of cell population proliferation	23	1594	0.37	0.004	RIPK2,C2orf40,INHBA,FGF10,ZAP70,PROK1,SFRP2,TNFSF4,ADAMTS1,FGFR4,PRKCI,STAT6,HNF4A,IFNL1,TSLP,DUSP15,CDH5,DLL1,S100A6,VAV3,ANXA1,HMGN1,TGFB1I1
Male	Process	GO:0050793		regulation of developmental process	32	2416	0.33	0.0013	CX3CL1,RIPK2,INHBA,CSNK1G2,FGF10,ZAP70,STAP1,PIK3C2A,PROK1,SFRP2,LRRTM2,TNFSF4,GRID2,WIF1,ITGA5,PRKCI,STAT6,ZHX3,HNF4A,CDK5R1,IFNL1,IL17F,CDH5,NEGR1,DLL1,PARP1,ROR1,ANXA1,KIAA0319,HMGN1,TGFB1I1,PAXIP1
Male	Process	GO:0051094	(+)	regulation of developmental process	22	1286	0.44	0.0009	CX3CL1,RIPK2,INHBA,FGF10,ZAP70,PIK3C2A,SFRP2,LRRTM2,TNFSF4,GRID2,WIF1,ITGA5,PRKCI,STAT6,ZHX3,CDH5,NEGR1,DLL1,PARP1,ANXA1,TGFB1I1,PAXIP1
Male	Process	GO:2000026		regulation of multicellular organismal development	27	1876	0.37	0.0015	CX3CL1,RIPK2,INHBA,FGF10,ZAP70,STAP1,PIK3C2A,PROK1,SFRP2,LRRTM2,TNFSF4,GRID2,ITGA5,PRKCI,STAT6,HNF4A,CDK5R1,IFNL1,IL17F,CDH5,NEGR1,DLL1,ROR1,ANXA1,KIAA0319,TGFB1I1,PAXIP1
Male	Process	GO:1903672	(+)	regulation of sprouting angiogenesis	4	38	1.23	0.0041	PIK3C2A,ITGA5,DLL1,ANXA1
Male	Process	GO:0048731		system development	48	4144	0.27	0.00028	CX3CL1,RELB,RAB35,C2orf40,INHBA,DNAJB9,KLK12,DSG1,FGF10,ZAP70,STAP1,PROK1,SFRP2,GRID2,ADAMTS1,ITGA5,PRKCI,STAT6,SEMA4C,PCDHB1,WFIKKN2,CDK5R1,IL17F,CDH5,NEGR1,DLL1,PARP1,IGSF9,S100A6,VAV3,NTNG1,BCAR3,ROR1,EDA,ANXA1,KIAA0319,HMGN1,DNAJC19,ERO1L,PAXIP1,IL18R1,CA10,LTB,EFNA4,TRA2B,DBNL,TAGLN,PCDHA4
Male	Process	GO:0007155		cell adhesion	17	843	0.51	0.0013	CX3CL1,ICAM3,CD97,DSG1,ZAP70,GRID2,ITGA5,PCDHB1,CDK5R1,CDH5,NEGR1,IGSF9,NTNG1,EDA,TGFB1I1,PCDHA4,SPON1
Male	Process	GO:0007154		cell communication	62	5219	0.28	2.2e-06	CX3CL1,ICAM3,RIPK2,RELB,CCL1,NRBP1,C2orf40,INHBA,CD97,DNAJB9,CSNK1G2,RGS8,FGF10,ZAP70,STAP1,PIK3C2A,PROK1,SFRP2,TNFSF4,GRID2,ADAMTS1,WIF1,FGFR4,ITGA5,CXCL16,PRKCI,STAT6,SEMA4C,PCDHB1,WFIKKN2,HNF4A,UBE2N,CDK5R1,IL3RA,IFNL1,IL17F,TSLP,DUSP15,CDH5,DLL1,PARP1,S100A6,VAV3,BCAR3,ROR1,EDA,ANXA1,TGFB1I1,ERO1L,MOB1A,EDA2R,IL15RA,COLEC12,PAXIP1,IL18BP,IL18R1,LTB,EFNA4,DBNL,PARK7,PPIA,PCDHA4
Male	Process	GO:0007166		cell surface receptor signaling pathway	45	2198	0.52	3.98e-10	CX3CL1,ICAM3,RIPK2,RELB,CCL1,INHBA,CD97,CSNK1G2,FGF10,ZAP70,STAP1,PIK3C2A,SFRP2,TNFSF4,GRID2,ADAMTS1,WIF1,FGFR4,ITGA5,STAT6,SEMA4C,WFIKKN2,HNF4A,UBE2N,CDK5R1,IL3RA,IFNL1,IL17F,TSLP,DUSP15,CDH5,DLL1,PARP1,VAV3,ROR1,EDA,ANXA1,TGFB1I1,EDA2R,IL15RA,IL18BP,IL18R1,LTB,EFNA4,PPIA
Male	Process	GO:0098609		cell-cell adhesion	12	416	0.67	0.00087	ICAM3,DSG1,ZAP70,GRID2,ITGA5,PCDHB1,CDK5R1,CDH5,NEGR1,IGSF9,NTNG1,PCDHA4
Male	Process	GO:0098742		cell-cell adhesion via plasma-membrane adhesion molecules	8	230	0.75	0.0039	DSG1,GRID2,ITGA5,PCDHB1,CDH5,IGSF9,NTNG1,PCDHA4
Male	Process	GO:0007267		cell-cell signaling	17	1073	0.41	0.0088	C2orf40,INHBA,CD97,CSNK1G2,FGF10,SFRP2,GRID2,WIF1,PCDHB1,DLL1,ROR1,ANXA1,TGFB1I1,LTB,EFNA4,PARK7,PCDHA4
Male	Process	GO:0070887		cellular response to chemical stimulus	42	2672	0.41	1.59e-06	CX3CL1,RIPK2,CCL1,RAB35,INHBA,DNAJB9,RGS8,FGF10,STAP1,PIK3C2A,TNFSF4,FGFR4,CXCL16,PRKCI,GAS1,STAT6,WFIKKN2,HNF4A,UBE2N,CDK5R1,IL3RA,IFNL1,IL17F,UBE2G2,TSLP,DUSP15,CDH5,PARP1,VAV3,EDA,ANXA1,TGFB1I1,ERO1L,EDA2R,IL15RA,COLEC12,IL18BP,IL18R1,LTB,TRA2B,PARK7,PPIA
Male	Process	GO:0071345		cellular response to cytokine stimulus	19	953	0.51	0.00055	CX3CL1,RIPK2,CCL1,TNFSF4,STAT6,UBE2N,IL3RA,IFNL1,IL17F,UBE2G2,TSLP,EDA,ANXA1,EDA2R,IL15RA,IL18BP,IL18R1,LTB,PPIA
Male	Process	GO:0071310		cellular response to organic substance	40	2219	0.46	1.52e-07	CX3CL1,RIPK2,CCL1,RAB35,INHBA,DNAJB9,RGS8,FGF10,STAP1,PIK3C2A,TNFSF4,FGFR4,PRKCI,GAS1,STAT6,WFIKKN2,HNF4A,UBE2N,CDK5R1,IL3RA,IFNL1,IL17F,UBE2G2,TSLP,DUSP15,CDH5,PARP1,EDA,ANXA1,TGFB1I1,ERO1L,EDA2R,IL15RA,COLEC12,IL18BP,IL18R1,LTB,TRA2B,PARK7,PPIA
Male	Process	GO:0051716		cellular response to stimulus	68	6212	0.25	5.05e-06	CX3CL1,ICAM3,RIPK2,RELB,SGTA,CCL1,RAB35,NRBP1,C2orf40,INHBA,CD97,DNAJB9,CSNK1G2,RGS8,FGF10,ZAP70,STAP1,PIK3C2A,PROK1,SFRP2,TNFSF4,GRID2,ADAMTS1,WIF1,FGFR4,ITGA5,CXCL16,PRKCI,GAS1,STAT6,SEMA4C,WFIKKN2,HNF4A,UBE2N,CDK5R1,IL3RA,IFNL1,IL17F,UBE2G2,TSLP,DUSP15,CDH5,SCARA5,ADSS,DLL1,PARP1,S100A6,VAV3,BCAR3,ROR1,EDA,ANXA1,HMGN1,TGFB1I1,ERO1L,MOB1A,EDA2R,IL15RA,COLEC12,PAXIP1,IL18BP,IL18R1,LTB,EFNA4,TRA2…
Male	Process	GO:0071356		cellular response to tumor necrosis factor	7	197	0.76	0.0071	CX3CL1,CCL1,TNFSF4,EDA,EDA2R,IL18BP,LTB
Male	Process	GO:0019221		cytokine-mediated signaling pathway	18	655	0.65	2.39e-05	CX3CL1,RIPK2,CCL1,TNFSF4,STAT6,UBE2N,IL3RA,IFNL1,IL17F,TSLP,EDA,ANXA1,EDA2R,IL15RA,IL18BP,IL18R1,LTB,PPIA
Male	Process	GO:0006897		endocytosis	12	510	0.58	0.0032	ICAM3,CSNK1G2,PIK3C2A,CXCL16,SCARA5,DLL1,VAV3,RABEPK,ANXA1,COLEC12,COLEC11,DBNL
Male	Process	GO:0007167		enzyme linked receptor protein signaling pathway	16	698	0.57	0.00058	INHBA,FGF10,ZAP70,STAP1,PIK3C2A,FGFR4,WFIKKN2,HNF4A,CDK5R1,DUSP15,CDH5,PARP1,VAV3,ROR1,TGFB1I1,EFNA4
Male	Process	GO:0046166		glyceraldehyde-3-phosphate biosynthetic process	2	2	2.21	0.0062	TPI1,TKT
Male	Process	GO:0098657		import into cell	13	609	0.54	0.004	ICAM3,CSNK1G2,PIK3C2A,CXCL16,SCARA5,DLL1,VAV3,RABEPK,ANXA1,COLEC12,COLEC11,DBNL,PARK7
Male	Process	GO:0018193		peptidyl-amino acid modification	18	842	0.54	0.0004	RIPK2,SUV420H2,CSNK1G2,FOLH1,FGF10,ZAP70,FGFR4,PRKCI,CDK5R1,IL3RA,UBE2G2,PARP1,CLK2,ROR1,PAXIP1,EFNA4,PARK7,PPIA
Male	Process	GO:0018108		peptidyl-tyrosine phosphorylation	8	195	0.82	0.0017	RIPK2,FGF10,ZAP70,FGFR4,IL3RA,CLK2,ROR1,EFNA4
Male	Process	GO:0006898		receptor-mediated endocytosis	7	209	0.73	0.0091	CXCL16,SCARA5,DLL1,RABEPK,COLEC12,COLEC11,DBNL
Male	Process	GO:0010646		regulation of cell communication	48	3327	0.37	1.53e-06	CX3CL1,RIPK2,CCL1,C2orf40,INHBA,DNAJB9,RGS8,IER3,MIA,FGF10,ZAP70,STAP1,PROK1,SFRP2,LRRTM2,TNFSF4,GRID2,WIF1,FGFR4,ITGA5,CXCL16,PRKCI,GAS1,SEMA4C,WFIKKN2,HNF4A,UBE2N,CDK5R1,IFNL1,ENTPD5,IL17F,TSLP,DUSP15,DLL1,PARP1,VAV3,BCAR3,ROR1,EDA,ANXA1,TGFB1I1,EDA2R,MRAP,IL18BP,IL18R1,LTB,DBNL,PARK7
Male	Process	GO:0010647	(+)	regulation of cell communication	31	1631	0.49	3.21e-06	CX3CL1,RIPK2,CCL1,C2orf40,INHBA,FGF10,ZAP70,STAP1,PROK1,SFRP2,LRRTM2,FGFR4,ITGA5,PRKCI,SEMA4C,UBE2N,IFNL1,TSLP,DUSP15,DLL1,PARP1,VAV3,BCAR3,ROR1,EDA,TGFB1I1,EDA2R,MRAP,IL18R1,DBNL,PARK7
Male	Process	GO:0031325	(+)	regulation of cellular metabolic process	39	3060	0.31	0.00038	CX3CL1,TOX3,RIPK2,RELB,SGTA,CCL1,INHBA,DCUN1D5,MLYCD,FGF10,STAP1,PROK1,SFRP2,TNFSF4,FGFR4,ITGA5,STAT6,SEMA4C,HNF4A,UBE2N,CDK5R1,IFNL1,ENTPD5,IL17F,TSLP,DUSP15,DLL1,PARP1,VAV3,BCAR3,ANXA1,HMGN1,TGFB1I1,EDA2R,PAXIP1,LTB,TRA2B,DBNL,PARK7
Male	Process	GO:0048522	(+)	regulation of cellular process	58	4898	0.28	8.27e-06	CX3CL1,TOX3,RIPK2,RELB,SGTA,CCL1,C2orf40,INHBA,DCUN1D5,MLYCD,FGF10,ZAP70,STAP1,PIK3C2A,PROK1,SFRP2,LRRTM2,TNFSF4,GRID2,ADAMTS1,WIF1,FGFR4,ITGA5,CXCL16,PRKCI,STAT6,SEMA4C,ZHX3,HNF4A,UBE2N,CDK5R1,IFNL1,ENTPD5,IL17F,TSLP,DUSP15,CDH5,NEGR1,DLL1,PARP1,S100A6,VAV3,BCAR3,ROR1,EDA,ANXA1,HMGN1,TGFB1I1,EDA2R,MRAP,COLEC12,PAXIP1,IL18R1,LTB,TRA2B,DBNL,PARK7,PPIA
Male	Process	GO:0032270	(+)	regulation of cellular protein metabolic process	23	1496	0.4	0.0019	CX3CL1,RIPK2,SGTA,CCL1,INHBA,DCUN1D5,FGF10,STAP1,PROK1,SFRP2,FGFR4,ITGA5,SEMA4C,UBE2N,CDK5R1,IFNL1,TSLP,DUSP15,BCAR3,EDA2R,PAXIP1,DBNL,PARK7
Male	Process	GO:0080135		regulation of cellular response to stress	15	618	0.59	0.00058	RIPK2,SGTA,DNAJB9,IER3,FGF10,SFRP2,SEMA4C,UBE2N,UBE2G2,DUSP15,PARP1,EDA2R,PAXIP1,DBNL,PARK7
Male	Process	GO:0001817		regulation of cytokine production	14	615	0.57	0.0017	CX3CL1,RIPK2,RELB,INHBA,TNFSF4,STAT6,IFNL1,IL17F,TSLP,DLL1,ANXA1,IL18R1,LTB,PARK7
Male	Process	GO:0001819	(+)	regulation of cytokine production	11	390	0.66	0.0017	CX3CL1,RIPK2,TNFSF4,STAT6,IFNL1,IL17F,TSLP,ANXA1,IL18R1,LTB,PARK7
Male	Process	GO:0051054	(+)	regulation of DNA metabolic process	7	209	0.73	0.0091	FGF10,TNFSF4,FGFR4,STAT6,UBE2N,PARP1,PAXIP1
Male	Process	GO:0051091	(+)	regulation of DNA-binding transcription factor activity	8	250	0.71	0.0057	RIPK2,PRKCI,UBE2N,ROR1,EDA,EDA2R,IL18R1,PARK7
Male	Process	GO:1902531		regulation of intracellular signal transduction	26	1764	0.38	0.0015	CX3CL1,RIPK2,CCL1,INHBA,IER3,FGF10,ZAP70,PROK1,SFRP2,FGFR4,SEMA4C,UBE2N,CDK5R1,IFNL1,ENTPD5,TSLP,DUSP15,PARP1,VAV3,ROR1,EDA,EDA2R,MRAP,IL18R1,DBNL,PARK7
Male	Process	GO:1902533	(+)	regulation of intracellular signal transduction	19	959	0.51	0.00058	CX3CL1,RIPK2,CCL1,FGF10,ZAP70,PROK1,FGFR4,SEMA4C,UBE2N,IFNL1,TSLP,DUSP15,ROR1,EDA,EDA2R,MRAP,IL18R1,DBNL,PARK7
Male	Process	GO:0010604	(+)	regulation of macromolecule metabolic process	36	3081	0.28	0.0031	CX3CL1,TOX3,RIPK2,RELB,SGTA,CCL1,INHBA,DCUN1D5,FGF10,STAP1,PROK1,SFRP2,TNFSF4,FGFR4,ITGA5,STAT6,SEMA4C,HNF4A,UBE2N,CDK5R1,IFNL1,IL17F,TSLP,DUSP15,DLL1,PARP1,BCAR3,EDA,HMGN1,TGFB1I1,EDA2R,PAXIP1,LTB,TRA2B,DBNL,PARK7
Male	Process	GO:0043410	(+)	regulation of MAPK cascade	11	512	0.54	0.0091	CX3CL1,RIPK2,CCL1,FGF10,PROK1,FGFR4,SEMA4C,UBE2N,DUSP15,EDA2R,DBNL
Male	Process	GO:0009893	(+)	regulation of metabolic process	40	3280	0.29	0.00069	CX3CL1,TOX3,RIPK2,RELB,SGTA,CCL1,INHBA,DCUN1D5,MLYCD,FGF10,STAP1,PROK1,SFRP2,TNFSF4,FGFR4,ITGA5,STAT6,SEMA4C,HNF4A,UBE2N,CDK5R1,IFNL1,ENTPD5,IL17F,TSLP,DUSP15,DLL1,PARP1,VAV3,BCAR3,EDA,ANXA1,HMGN1,TGFB1I1,EDA2R,PAXIP1,LTB,TRA2B,DBNL,PARK7
Male	Process	GO:0065009		regulation of molecular function	38	3322	0.27	0.003	CX3CL1,RIPK2,CCL1,C2orf40,INHBA,RGS8,DCUN1D5,MIA,FGF10,GCKR,STAP1,PROK1,SFRP2,TNFSF4,FGFR4,CXCL16,PRKCI,WFIKKN2,UBE2N,CDK5R1,IL3RA,IFNL1,IL17F,TSLP,CLPSL2,PARP1,VAV3,BCAR3,ROR1,EDA,ANXA1,HMGN1,EDA2R,IL18BP,IL18R1,LTB,DBNL,PARK7
Male	Process	GO:0044093	(+)	regulation of molecular function	23	1713	0.34	0.0083	CX3CL1,RIPK2,CCL1,RGS8,DCUN1D5,FGF10,STAP1,PROK1,SFRP2,FGFR4,PRKCI,UBE2N,CDK5R1,CLPSL2,PARP1,VAV3,ROR1,EDA,HMGN1,EDA2R,IL18R1,DBNL,PARK7
Male	Process	GO:0051173	(+)	regulation of nitrogen compound metabolic process	36	2946	0.3	0.0017	CX3CL1,TOX3,RIPK2,RELB,SGTA,CCL1,INHBA,DCUN1D5,FGF10,STAP1,PROK1,SFRP2,TNFSF4,FGFR4,ITGA5,STAT6,SEMA4C,HNF4A,UBE2N,CDK5R1,IFNL1,ENTPD5,IL17F,TSLP,DUSP15,DLL1,PARP1,BCAR3,HMGN1,TGFB1I1,EDA2R,PAXIP1,LTB,TRA2B,DBNL,PARK7
Male	Process	GO:0019220		regulation of phosphate metabolic process	24	1657	0.37	0.003	CX3CL1,RIPK2,CCL1,INHBA,FGF10,GCKR,STAP1,PROK1,SFRP2,FGFR4,ITGA5,SEMA4C,UBE2N,CDK5R1,IFNL1,ENTPD5,TSLP,DUSP15,PARP1,VAV3,BCAR3,EDA2R,DBNL,PARK7
Male	Process	GO:0042325		regulation of phosphorylation	23	1465	0.4	0.0017	CX3CL1,RIPK2,CCL1,INHBA,FGF10,GCKR,STAP1,PROK1,SFRP2,FGFR4,ITGA5,SEMA4C,UBE2N,CDK5R1,IFNL1,ENTPD5,TSLP,DUSP15,VAV3,BCAR3,EDA2R,DBNL,PARK7
Male	Process	GO:0042327	(+)	regulation of phosphorylation	22	984	0.56	2.78e-05	CX3CL1,RIPK2,CCL1,INHBA,FGF10,STAP1,PROK1,SFRP2,FGFR4,ITGA5,SEMA4C,UBE2N,CDK5R1,IFNL1,ENTPD5,TSLP,DUSP15,VAV3,BCAR3,EDA2R,DBNL,PARK7
Male	Process	GO:0051247	(+)	regulation of protein metabolic process	24	1587	0.39	0.0017	CX3CL1,RIPK2,SGTA,CCL1,INHBA,DCUN1D5,FGF10,STAP1,PROK1,SFRP2,FGFR4,ITGA5,SEMA4C,UBE2N,CDK5R1,IFNL1,TSLP,DUSP15,BCAR3,EDA2R,PAXIP1,LTB,DBNL,PARK7
Male	Process	GO:0031401	(+)	regulation of protein modification process	22	1149	0.49	0.00021	CX3CL1,RIPK2,CCL1,INHBA,DCUN1D5,FGF10,STAP1,PROK1,SFRP2,FGFR4,ITGA5,SEMA4C,UBE2N,CDK5R1,IFNL1,TSLP,DUSP15,BCAR3,EDA2R,PAXIP1,DBNL,PARK7
Male	Process	GO:0001934	(+)	regulation of protein phosphorylation	20	941	0.54	0.00015	CX3CL1,RIPK2,CCL1,INHBA,FGF10,STAP1,PROK1,SFRP2,FGFR4,ITGA5,SEMA4C,UBE2N,CDK5R1,IFNL1,TSLP,DUSP15,BCAR3,EDA2R,DBNL,PARK7
Male	Process	GO:1903573	(-)	regulation of response to endoplasmic reticulum stress	4	44	1.17	0.006	SGTA,DNAJB9,UBE2G2,PARK7
Male	Process	GO:0032101		regulation of response to external stimulus	16	955	0.43	0.0077	CX3CL1,ICAM3,RIPK2,RELB,CCL1,FGF10,STAP1,TNFSF4,GRID2,UBE2N,IL17F,TSLP,CDH5,ANXA1,COLEC12,PARK7
Male	Process	GO:0032103	(+)	regulation of response to external stimulus	13	499	0.62	0.001	CX3CL1,ICAM3,RIPK2,RELB,CCL1,FGF10,STAP1,TNFSF4,UBE2N,IL17F,TSLP,COLEC12,PARK7
Male	Process	GO:0048583		regulation of response to stimulus	56	3882	0.37	6.44e-08	CX3CL1,ICAM3,RIPK2,RELB,SGTA,CCL1,C2orf40,INHBA,DNAJB9,RGS8,IER3,MIA,FGF10,ZAP70,STAP1,PROK1,SFRP2,TNFSF4,GRID2,WIF1,FGFR4,ITGA5,CXCL16,PRKCI,GAS1,STAT6,SEMA4C,WFIKKN2,HNF4A,UBE2N,CDK5R1,IFNL1,ENTPD5,IL17F,UBE2G2,TSLP,DUSP15,CDH5,DLL1,PARP1,VAV3,BCAR3,ROR1,EDA,ANXA1,TGFB1I1,EDA2R,MRAP,COLEC12,PAXIP1,IL18BP,IL18R1,LTB,COLEC11,DBNL,PARK7
Male	Process	GO:0048584	(+)	regulation of response to stimulus	39	2054	0.49	7.7e-08	CX3CL1,ICAM3,RIPK2,RELB,SGTA,CCL1,INHBA,FGF10,ZAP70,STAP1,PROK1,SFRP2,TNFSF4,FGFR4,ITGA5,PRKCI,STAT6,SEMA4C,UBE2N,IFNL1,IL17F,TSLP,DUSP15,DLL1,PARP1,VAV3,BCAR3,ROR1,EDA,ANXA1,TGFB1I1,EDA2R,MRAP,COLEC12,PAXIP1,IL18R1,COLEC11,DBNL,PARK7
Male	Process	GO:0080134		regulation of response to stress	25	1299	0.49	5.3e-05	CX3CL1,ICAM3,RIPK2,RELB,SGTA,DNAJB9,IER3,FGF10,STAP1,SFRP2,TNFSF4,SEMA4C,UBE2N,IL17F,UBE2G2,TSLP,DUSP15,CDH5,PARP1,ANXA1,EDA2R,COLEC12,PAXIP1,DBNL,PARK7
Male	Process	GO:0009966		regulation of signal transduction	45	3033	0.38	1.69e-06	CX3CL1,RIPK2,CCL1,C2orf40,INHBA,DNAJB9,RGS8,IER3,MIA,FGF10,ZAP70,STAP1,PROK1,SFRP2,TNFSF4,WIF1,FGFR4,ITGA5,CXCL16,PRKCI,GAS1,SEMA4C,WFIKKN2,HNF4A,UBE2N,CDK5R1,IFNL1,ENTPD5,IL17F,TSLP,DUSP15,DLL1,PARP1,VAV3,BCAR3,ROR1,EDA,TGFB1I1,EDA2R,MRAP,IL18BP,IL18R1,LTB,DBNL,PARK7
Male	Process	GO:0009967	(+)	regulation of signal transduction	29	1493	0.5	5.19e-06	CX3CL1,RIPK2,CCL1,INHBA,FGF10,ZAP70,STAP1,PROK1,SFRP2,FGFR4,ITGA5,PRKCI,SEMA4C,UBE2N,IFNL1,TSLP,DUSP15,DLL1,PARP1,VAV3,BCAR3,ROR1,EDA,TGFB1I1,EDA2R,MRAP,IL18R1,DBNL,PARK7
Male	Process	GO:0023051		regulation of signaling	48	3360	0.36	1.59e-06	CX3CL1,RIPK2,CCL1,C2orf40,INHBA,DNAJB9,RGS8,IER3,MIA,FGF10,ZAP70,STAP1,PROK1,SFRP2,LRRTM2,TNFSF4,GRID2,WIF1,FGFR4,ITGA5,CXCL16,PRKCI,GAS1,SEMA4C,WFIKKN2,HNF4A,UBE2N,CDK5R1,IFNL1,ENTPD5,IL17F,TSLP,DUSP15,DLL1,PARP1,VAV3,BCAR3,ROR1,EDA,ANXA1,TGFB1I1,EDA2R,MRAP,IL18BP,IL18R1,LTB,DBNL,PARK7
Male	Process	GO:0023056	(+)	regulation of signaling	31	1638	0.49	3.31e-06	CX3CL1,RIPK2,CCL1,C2orf40,INHBA,FGF10,ZAP70,STAP1,PROK1,SFRP2,LRRTM2,FGFR4,ITGA5,PRKCI,SEMA4C,UBE2N,IFNL1,TSLP,DUSP15,DLL1,PARP1,VAV3,BCAR3,ROR1,EDA,TGFB1I1,EDA2R,MRAP,IL18R1,DBNL,PARK7
Male	Process	GO:0010469		regulation of signaling receptor activity	18	577	0.7	4.69e-06	CX3CL1,CCL1,C2orf40,INHBA,MIA,FGF10,PROK1,SFRP2,TNFSF4,CXCL16,WFIKKN2,IFNL1,IL17F,TSLP,EDA,IL18BP,LTB,PARK7
Male	Process	GO:0042221		response to chemical	54	4153	0.32	2.13e-06	CX3CL1,RIPK2,RELB,SGTA,CCL1,RAB35,INHBA,DNAJB9,DSG1,RGS8,FGF10,GCKR,STAP1,PIK3C2A,SFRP2,TNFSF4,FGFR4,CXCL16,PRKCI,GAS1,STAT6,SEMA4C,WFIKKN2,HNF4A,UBE2N,CDK5R1,IL3RA,SLC25A18,IFNL1,IL17F,UBE2G2,TSLP,DUSP15,CDH5,CLPSL2,ADSS,PARP1,CLK2,VAV3,BCAR3,EDA,ANXA1,TGFB1I1,ERO1L,EDA2R,IL15RA,COLEC12,IL18BP,IL18R1,LTB,EFNA4,TRA2B,PARK7,PPIA
Male	Process	GO:0034097		response to cytokine	22	1035	0.54	5.43e-05	CX3CL1,RIPK2,RELB,CCL1,TNFSF4,CXCL16,PRKCI,STAT6,UBE2N,IL3RA,IFNL1,IL17F,UBE2G2,TSLP,EDA,ANXA1,EDA2R,IL15RA,IL18BP,IL18R1,LTB,PPIA
Male	Process	GO:0010033		response to organic substance	47	2815	0.43	6.44e-08	CX3CL1,RIPK2,RELB,SGTA,CCL1,RAB35,INHBA,DNAJB9,DSG1,RGS8,FGF10,GCKR,STAP1,PIK3C2A,TNFSF4,FGFR4,CXCL16,PRKCI,GAS1,STAT6,WFIKKN2,HNF4A,UBE2N,CDK5R1,IL3RA,IFNL1,IL17F,UBE2G2,TSLP,DUSP15,CDH5,ADSS,PARP1,CLK2,EDA,ANXA1,TGFB1I1,ERO1L,EDA2R,IL15RA,COLEC12,IL18BP,IL18R1,LTB,TRA2B,PARK7,PPIA
Male	Process	GO:0050896		response to stimulus	75	7824	0.19	9.3e-05	CX3CL1,ICAM3,RIPK2,RELB,SGTA,CCL1,RAB35,NRBP1,C2orf40,INHBA,CD97,DNAJB9,CSNK1G2,DSG1,RGS8,MLYCD,FGF10,GCKR,ZAP70,STAP1,PIK3C2A,PROK1,SFRP2,TNFSF4,GRID2,ADAMTS1,WIF1,FGFR4,ITGA5,CXCL16,PRKCI,GAS1,STAT6,SEMA4C,WFIKKN2,HNF4A,UBE2N,CDK5R1,IL3RA,SLC25A18,IFNL1,IL17F,UBE2G2,TSLP,DUSP15,CDH5,SCARA5,CLPSL2,ADSS,DLL1,PARP1,CLK2,S100A6,VAV3,BCAR3,ROR1,EDA,ANXA1,HMGN1,TGFB1I1,ERO1L,MOB1A,EDA2R,IL15RA,COLEC1…
Male	Process	GO:0006950		response to stress	37	3267	0.26	0.0041	CX3CL1,RIPK2,RELB,SGTA,CCL1,C2orf40,INHBA,CD97,DNAJB9,MLYCD,FGF10,ZAP70,TNFSF4,ITGA5,CXCL16,STAT6,HNF4A,UBE2N,IFNL1,IL17F,UBE2G2,TSLP,SCARA5,PARP1,VAV3,ANXA1,HMGN1,TGFB1I1,ERO1L,COLEC12,PAXIP1,IL18BP,IL18R1,COLEC11,TRA2B,DBNL,PARK7
Male	Process	GO:0034612		response to tumor necrosis factor	8	217	0.78	0.003	CX3CL1,CCL1,TNFSF4,CXCL16,EDA,EDA2R,IL18BP,LTB
Male	Process	GO:0007165		signal transduction	60	4738	0.31	8.29e-07	CX3CL1,ICAM3,RIPK2,RELB,CCL1,NRBP1,C2orf40,INHBA,CD97,DNAJB9,CSNK1G2,RGS8,FGF10,ZAP70,STAP1,PIK3C2A,PROK1,SFRP2,TNFSF4,GRID2,ADAMTS1,WIF1,FGFR4,ITGA5,CXCL16,PRKCI,STAT6,SEMA4C,WFIKKN2,HNF4A,UBE2N,CDK5R1,IL3RA,IFNL1,IL17F,TSLP,DUSP15,CDH5,DLL1,PARP1,S100A6,VAV3,BCAR3,ROR1,EDA,ANXA1,TGFB1I1,ERO1L,MOB1A,EDA2R,IL15RA,COLEC12,PAXIP1,IL18BP,IL18R1,LTB,EFNA4,DBNL,PARK7,PPIA
Male	Process	GO:0023052		signaling	62	5108	0.29	1.53e-06	CX3CL1,ICAM3,RIPK2,RELB,CCL1,NRBP1,C2orf40,INHBA,CD97,DNAJB9,CSNK1G2,RGS8,FGF10,ZAP70,STAP1,PIK3C2A,PROK1,SFRP2,TNFSF4,GRID2,ADAMTS1,WIF1,FGFR4,ITGA5,CXCL16,PRKCI,STAT6,SEMA4C,PCDHB1,WFIKKN2,HNF4A,UBE2N,CDK5R1,IL3RA,IFNL1,IL17F,TSLP,DUSP15,CDH5,DLL1,PARP1,S100A6,VAV3,BCAR3,ROR1,EDA,ANXA1,TGFB1I1,ERO1L,MOB1A,EDA2R,IL15RA,COLEC12,PAXIP1,IL18BP,IL18R1,LTB,EFNA4,DBNL,PARK7,PPIA,PCDHA4
Male	Process	GO:0007178		transmembrane receptor protein serine/threonine kinase signaling pathway	7	189	0.78	0.006	INHBA,WFIKKN2,HNF4A,DUSP15,CDH5,PARP1,TGFB1I1
Male	RCTM (reactome)	HSA-1280215		Cytokine Signaling in Immune system	13	328	0.81	6.25e-06	RIPK2,RELB,TNFSF4,STAT6,IL3RA,IFNL1,IL17F,EDA,ANXA1,EDA2R,IL18BP,IL18R1,LTB
Female	Component	GO:0035578		azurophil granule lumen	6	92	0.87	0.0047	RETN,MPO,PRTN3,FABP5,PSMD1,TOLLIP
Female	Component	GO:0098588		bounding membrane of organelle	32	1950	0.27	0.0086	GABARAPL2,TNFRSF1A,SPG21,GNPNAT1,SEC61B,SELL,PKD2,CYTH4,BCL2L2,SNX4,TSG101,VPS4A,MUL1,GJA1,FABP5,LMAN2,OLR1,SNCA,SIGLEC14,SCAMP5,CUZD1,KIAA1324,OCRL,HSP90AB1,TMEM57,ROR2,TNFRSF1B,CHMP3,CYTH2,ARFGAP2,MRC1,NCAM1
Female	Component	GO:0071944		cell periphery	83	5254	0.25	9.55e-07	RELT,TNFRSF1A,HSD17B10,MADCAM1,IL2RB,TAX1BP3,ULBP1,PRTN3,SELL,PKD2,KLRK1,LYPD3,TREM1,EFNB2,CYTH4,SNX4,TSG101,VPS4A,KRAS,FOLH1,MRAP2,HTRA2,EDAR,PLXNC1,FCER2,TENM4,GJA1,CA2,IL17RB,FABP5,LMAN2,RAC3,PRKCB,PLG,OLR1,PRKACA,CASP3,TOLLIP,SIGLEC7,IGLL1,CD300C,SNCA,PTP4A2,KEL,RAET1E,KIRREL2,SIGLEC14,SCAMP5,RGS18,FLNA,KIAA1324,TNFRSF6B,SMAP1,OCRL,HSP90AB1,MPL,ROR2,C6orf25,TNFRSF1B,RS1,BRPF1,GOLM1,GRB2,NME1-…
Female	Component	GO:0005737		cytoplasm	130	11238	0.11	0.00011	GABARAPL2,RELT,TNFRSF1A,PRLH,HSD17B10,HSD17B2,SPG21,PSMD5,IL2RB,GNPNAT1,RETN,MRPL32,SEC61B,MPO,TAX1BP3,ULBP1,PRTN3,SELL,PKD2,PIWIL1,NR1D1,CYTH4,LIF,BCL2L2,SNX4,TSG101,VPS4A,CSNK1G2,KRAS,FOLH1,HNF1A,MRAP2,HTRA2,MSTN,AARS,EIF3J,CRISPLD2,P4HA1,MUL1,TENM4,GJA1,CA2,AKR1B1,IL17RB,FABP5,SDHAF2,PAIP1,LMAN2,MZB1,RAC3,PRKCB,PPIH,PLG,OLR1,PSMD1,PRKACA,CASP3,TOLLIP,CEP57,NUDC,RCN2,CERS5,NPLOC4,SNCA,PTPN11,PT…
Female	Component	GO:0031410		cytoplasmic vesicle	42	2226	0.33	0.00011	GABARAPL2,SPG21,IL2RB,GNPNAT1,RETN,MPO,PRTN3,SELL,PKD2,SNX4,TSG101,VPS4A,CRISPLD2,GJA1,FABP5,PLG,OLR1,PSMD1,PRKACA,TOLLIP,SNCA,PTP4A2,CRKL,SIGLEC14,SCAMP5,UBQLN4,CUZD1,KIAA1324,OCRL,HSP90AB1,MMP9,LCN2,ROR2,TNFRSF1B,GRB2,NME1-NME2,YWHAZ,GSTP1,CHMP3,MRC1,TPT1,BTK
Female	Component	GO:0005829		cytosol	73	4958	0.22	0.0001	GABARAPL2,SPG21,PSMD5,IL2RB,GNPNAT1,SEC61B,TAX1BP3,ULBP1,PRTN3,CYTH4,LIF,BCL2L2,TSG101,VPS4A,CSNK1G2,KRAS,HTRA2,AARS,EIF3J,GJA1,CA2,AKR1B1,FABP5,SDHAF2,PAIP1,RAC3,PRKCB,PSMD1,PRKACA,CASP3,TOLLIP,CEP57,NUDC,NPLOC4,SNCA,PTPN11,PTP4A2,CRKL,MSRB3,RAD23B,SMYD2,GORAB,UBQLN4,FBXL4,UBL4A,FLNA,GOT1,OCRL,HSP90AB1,IGBP1,CARS,BRPF1,GRB2,NME1-NME2,PC,YWHAZ,GSTP1,OAS1,DIABLO,CHMP3,CNEP1R1,CYTH2,PRKCA,EIF2B1,XP…
Female	Component	GO:0012505		endomembrane system	74	4347	0.28	9.55e-07	GABARAPL2,TNFRSF1A,HSD17B2,SPG21,IL2RB,GNPNAT1,RETN,SEC61B,MPO,ULBP1,PRTN3,SELL,PKD2,CYTH4,SNX4,TSG101,VPS4A,MRAP2,HTRA2,CRISPLD2,P4HA1,GJA1,FABP5,LMAN2,MZB1,RAC3,PLG,OLR1,PSMD1,PRKACA,TOLLIP,CEP57,RCN2,CERS5,NPLOC4,SNCA,PTP4A2,CRKL,MSRB3,SIGLEC14,SCAMP5,GORAB,UBQLN4,CUZD1,KIAA1324,OCRL,HSP90AB1,MMP9,MPL,LCN2,TMEM57,C6orf25,TNFRSF1B,MAMDC2,GOLM1,GRB2,NME1-NME2,VIMP,GSTP1,MRAP,GGT2,OAS1,CHMP3,CNEP…
Female	Component	GO:0005576		extracellular region	52	2505	0.37	9.55e-07	TLL1,TNFRSF1A,PRLH,RETN,MPO,PRTN3,LYPD3,TREM1,LIF,TSG101,MSTN,CRISPLD2,FCER2,AKR1B1,IL17RB,FABP5,LMAN2,MZB1,PLG,OLR1,PSMD1,PRKACA,TOLLIP,IGLL1,PAPPA,SNCA,SERPINA6,RAET1E,FAIM3,XCL1,SMPDL3A,FLNA,TNFRSF6B,HSP90AB1,MMP9,WFDC2,LCN2,TNFRSF1B,MAMDC2,RS1,LAD1,NME1-NME2,SPOCK1,VIMP,GSTP1,IL18BP,OAS1,EFNA4,CST7,TPT1,C19orf80,NCAM1
Female	Component	GO:0005615		extracellular space	24	1134	0.38	0.0021	TNFRSF1A,RETN,MPO,LIF,TSG101,MSTN,AKR1B1,LMAN2,PLG,IGLL1,PAPPA,SNCA,XCL1,SMPDL3A,TNFRSF6B,MMP9,WFDC2,LCN2,RS1,SPOCK1,VIMP,IL18BP,CST7,TPT1
Female	Component	GO:0005887		integral component of plasma membrane	28	1564	0.3	0.0059	RELT,TNFRSF1A,IL2RB,SELL,PKD2,KLRK1,EFNB2,FOLH1,HTRA2,FCER2,TENM4,GJA1,IL17RB,LMAN2,OLR1,TOLLIP,SIGLEC7,CD300C,KIAA1324,TNFRSF6B,MPL,ROR2,TNFRSF1B,GOLM1,DIABLO,LYN,MRC1,IL12RB1
Female	Component	GO:0031226		intrinsic component of plasma membrane	31	1641	0.33	0.0018	RELT,TNFRSF1A,IL2RB,ULBP1,SELL,PKD2,KLRK1,LYPD3,EFNB2,FOLH1,HTRA2,FCER2,TENM4,GJA1,IL17RB,LMAN2,OLR1,TOLLIP,SIGLEC7,CD300C,KIAA1324,TNFRSF6B,MPL,ROR2,TNFRSF1B,GOLM1,DIABLO,EFNA4,LYN,MRC1,IL12RB1
Female	Component	GO:0005764		lysosome	15	582	0.46	0.0053	RETN,MPO,PRTN3,VPS4A,GJA1,AKR1B1,FABP5,PSMD1,TOLLIP,SNCA,KIAA1324,GOT1,HSP90AB1,LYN,BTK
Female	Component	GO:0016020		membrane	107	8420	0.16	7.07e-05	GABARAPL2,RELT,TNFRSF1A,HSD17B10,HSD17B2,SPG21,MADCAM1,IL2RB,GNPNAT1,MRPL32,SEC61B,TAX1BP3,ULBP1,PRTN3,SELL,PKD2,RARRES1,KLRK1,LYPD3,TREM1,EFNB2,CYTH4,BCL2L2,SNX4,TSG101,VPS4A,KRAS,FOLH1,FAM189A2,MRAP2,HTRA2,EDAR,PLXNC1,DGCR2,FCER2,MUL1,TENM4,GJA1,CA2,IL17RB,FRZB,FABP5,EVA1C,LMAN2,RAC3,PRKCB,PLG,OLR1,PRKACA,CASP3,TOLLIP,SIGLEC7,CERS5,FAM174B,IGLL1,CD300C,NPLOC4,SNCA,PTP4A2,KEL,RAET1E,KIRREL2,SIGL…
Female	Component	GO:0045121		membrane raft	10	300	0.57	0.0075	TNFRSF1A,PRTN3,KRAS,GJA1,OLR1,PRKACA,CASP3,TNFRSF1B,LYN,BTK
Female	Component	GO:0005886		plasma membrane	82	5159	0.25	9.55e-07	RELT,TNFRSF1A,HSD17B10,MADCAM1,IL2RB,TAX1BP3,ULBP1,PRTN3,SELL,PKD2,KLRK1,LYPD3,TREM1,EFNB2,CYTH4,SNX4,TSG101,VPS4A,KRAS,FOLH1,MRAP2,HTRA2,EDAR,PLXNC1,FCER2,TENM4,GJA1,CA2,IL17RB,FABP5,LMAN2,RAC3,PRKCB,PLG,OLR1,PRKACA,CASP3,TOLLIP,SIGLEC7,IGLL1,CD300C,SNCA,PTP4A2,KEL,RAET1E,KIRREL2,SIGLEC14,SCAMP5,RGS18,FLNA,KIAA1324,TNFRSF6B,SMAP1,OCRL,HSP90AB1,MPL,ROR2,C6orf25,TNFRSF1B,RS1,BRPF1,GOLM1,GRB2,VIMP,…
Female	Component	GO:0030141		secretory granule	19	828	0.41	0.0038	RETN,MPO,PRTN3,SELL,CRISPLD2,FABP5,PLG,OLR1,PSMD1,PRKACA,TOLLIP,SIGLEC14,CUZD1,HSP90AB1,MMP9,LCN2,TNFRSF1B,NME1-NME2,GSTP1
Female	Component	GO:0034774		secretory granule lumen	12	323	0.62	0.0017	RETN,MPO,PRTN3,CRISPLD2,FABP5,PLG,PSMD1,TOLLIP,HSP90AB1,LCN2,NME1-NME2,GSTP1
Female	Component	GO:0099503		secretory vesicle	21	948	0.4	0.0031	RETN,MPO,PRTN3,SELL,CRISPLD2,FABP5,PLG,OLR1,PSMD1,PRKACA,TOLLIP,SNCA,SIGLEC14,SCAMP5,CUZD1,HSP90AB1,MMP9,LCN2,TNFRSF1B,NME1-NME2,GSTP1
Female	Component	GO:0098552		side of membrane	14	436	0.56	0.0017	IL2RB,SELL,PKD2,KLRK1,KRAS,HTRA2,FCER2,PLG,IGLL1,GRB2,DIABLO,LYN,NCAM1,BTK
Female	Component	GO:0005773		vacuole	17	682	0.45	0.0035	GABARAPL2,RETN,MPO,PRTN3,VPS4A,GJA1,AKR1B1,FABP5,PSMD1,TOLLIP,SNCA,UBQLN4,KIAA1324,GOT1,HSP90AB1,LYN,BTK
Female	Component	GO:0031982		vesicle	43	2318	0.32	0.00011	GABARAPL2,SPG21,IL2RB,GNPNAT1,RETN,MPO,PRTN3,SELL,PKD2,SNX4,TSG101,VPS4A,CRISPLD2,GJA1,FABP5,PLG,OLR1,PSMD1,PRKACA,TOLLIP,SNCA,PTP4A2,CRKL,SIGLEC14,SCAMP5,UBQLN4,CUZD1,KIAA1324,OCRL,HSP90AB1,MMP9,LCN2,ROR2,TNFRSF1B,GRB2,NME1-NME2,YWHAZ,GSTP1,CHMP3,AKT1,MRC1,TPT1,BTK
Female	Component	GO:0098805		whole membrane	30	1554	0.34	0.0017	GABARAPL2,TNFRSF1A,SPG21,GNPNAT1,PRTN3,SELL,BCL2L2,SNX4,TSG101,VPS4A,KRAS,MUL1,GJA1,FABP5,OLR1,PRKACA,CASP3,SNCA,SIGLEC14,SCAMP5,CUZD1,KIAA1324,OCRL,HSP90AB1,ROR2,TNFRSF1B,CHMP3,LYN,MRC1,BTK
Female	Function	GO:0005488		binding	133	11878	0.1	0.0011	GABARAPL2,TLL1,TNFRSF1A,PRLH,HSD17B10,SPG21,MADCAM1,IL2RB,GNPNAT1,ORC6,RETN,SEC61B,MPO,TAX1BP3,ULBP1,PRTN3,SELL,PKD2,KLRK1,BATF3,LYPD3,TREM1,PIWIL1,EFNB2,NR1D1,CYTH4,LIF,BCL2L2,SNX4,TSG101,VPS4A,CSNK1G2,KRAS,FOLH1,HNF1A,MRAP2,HTRA2,PLXNC1,MSTN,AARS,EIF3J,PHF3,CRISPLD2,DGCR2,P4HA1,FCER2,MUL1,TENM4,GJA1,CA2,FRZB,FABP5,EVA1C,PAIP1,LMAN2,RAC3,PRKCB,PPIH,PLG,OLR1,PSMD1,PRKACA,CASP3,TOLLIP,CEP57,NUDC,R…
Female	Function	GO:0030246		carbohydrate binding	13	270	0.73	0.00022	GNPNAT1,SELL,KLRK1,DGCR2,P4HA1,FCER2,EVA1C,LMAN2,OLR1,SIGLEC7,SIGLEC14,RS1,MRC1
Female	Function	GO:0019899		enzyme binding	40	2197	0.31	0.0011	GABARAPL2,IL2RB,SEC61B,PRTN3,SELL,PKD2,PIWIL1,CYTH4,TSG101,MUL1,GJA1,PRKCB,PLG,PSMD1,PRKACA,CASP3,TOLLIP,NPLOC4,SNCA,PTPN11,SMYD2,UBE2T,FLNA,OCRL,HSP90AB1,IGBP1,ROR2,TNFRSF1B,GRB2,YWHAZ,VIMP,GSTP1,CHMP3,CYTH2,PRKCA,CST7,LYN,TOR1AIP1,AKT1,NCAM1
Female	Function	GO:0046875		ephrin receptor binding	4	28	1.21	0.0081	EFNB2,GRB2,EFNA4,LYN
Female	Function	GO:0042802		identical protein binding	37	1754	0.38	0.00015	TNFRSF1A,GNPNAT1,PKD2,KLRK1,BCL2L2,TSG101,KRAS,HNF1A,MRAP2,HTRA2,MSTN,P4HA1,MUL1,TENM4,FABP5,OLR1,CEP57,SNCA,CRKL,KIRREL2,CDC42BPA,XCL1,UBQLN4,FLNA,HSP90AB1,MMP9,CARS,GRB2,PC,YWHAZ,MRAP,CHMP3,EIF2B1,XPNPEP1,AKT1,NCAM1,BTK
Female	Function	GO:0098772		molecular function regulator	32	1793	0.3	0.0071	PRLH,IL2RB,RETN,SEC61B,CYTH4,LIF,MRAP2,MSTN,PSMD1,CASP3,SNCA,SERPINA6,RGS18,XCL1,FLNA,SMAP1,OCRL,HSP90AB1,WFDC2,IGBP1,GRB2,SPOCK1,GSTP1,IL18BP,LRRTM4,CYTH2,CST7,ARFGAP2,TOR1AIP1,AKT1,C19orf80,NCAM1
Female	Function	GO:0051219		phosphoprotein binding	7	80	0.99	0.0011	PKD2,CSNK1G2,SNCA,PTPN11,CRKL,GRB2,LYN
Female	Function	GO:0005515		protein binding	97	6607	0.22	1.68e-06	GABARAPL2,TNFRSF1A,PRLH,SPG21,MADCAM1,IL2RB,GNPNAT1,RETN,SEC61B,TAX1BP3,ULBP1,PRTN3,SELL,PKD2,KLRK1,LYPD3,TREM1,PIWIL1,EFNB2,NR1D1,CYTH4,LIF,BCL2L2,SNX4,TSG101,VPS4A,CSNK1G2,KRAS,HNF1A,MRAP2,HTRA2,PLXNC1,MSTN,P4HA1,FCER2,MUL1,TENM4,GJA1,FRZB,FABP5,LMAN2,RAC3,PRKCB,PLG,OLR1,PSMD1,PRKACA,CASP3,TOLLIP,CEP57,NUDC,IGLL1,NPLOC4,SNCA,PTPN11,CRKL,RAET1E,RAD23B,KIRREL2,CDC42BPA,SMYD2,UBE2T,XCL1,UBQLN4,UBL…
Female	Function	GO:0005102		signaling receptor binding	37	1513	0.44	5.95e-06	GABARAPL2,PRLH,SPG21,MADCAM1,RETN,ULBP1,PRTN3,PKD2,KLRK1,EFNB2,LIF,SNX4,MRAP2,PLXNC1,MSTN,FCER2,GJA1,PRKCB,PLG,CASP3,TOLLIP,IGLL1,PTPN11,RAET1E,XCL1,FLNA,HSP90AB1,ROR2,GRB2,MRAP,IL18BP,PRKCA,EFNA4,LYN,GSTK1,C19orf80,BTK
Female	Function	GO:0005031		tumor necrosis factor-activated receptor activity	4	25	1.26	0.0071	RELT,TNFRSF1A,TNFRSF6B,TNFRSF1B
Female	Function	GO:0031625		ubiquitin protein ligase binding	12	311	0.64	0.0023	GABARAPL2,TSG101,MUL1,PSMD1,PRKACA,TOLLIP,NPLOC4,UBE2T,HSP90AB1,TNFRSF1B,YWHAZ,LYN
Female	KEGG	hsa04662		B cell receptor signaling pathway	7	71	1.04	0.00062	KRAS,RAC3,PRKCB,GRB2,LYN,AKT1,BTK
Female	KEGG	hsa04062		Chemokine signaling pathway	8	181	0.7	0.0046	KRAS,PRKCB,PRKACA,CRKL,XCL1,GRB2,LYN,AKT1
Female	KEGG	hsa04666		Fc gamma R-mediated phagocytosis	5	89	0.8	0.0099	PRKCB,CRKL,PRKCA,LYN,AKT1
Female	KEGG	hsa04650		Natural killer cell mediated cytotoxicity	9	124	0.91	0.00062	ULBP1,KRAS,RAC3,PRKCB,CASP3,PTPN11,RAET1E,GRB2,PRKCA
Female	KEGG	hsa04915		Estrogen signaling pathway	6	133	0.71	0.0099	KRAS,PRKACA,HSP90AB1,MMP9,GRB2,AKT1
Female	KEGG	hsa05418		Fluid shear stress and atherosclerosis	6	133	0.71	0.0099	TNFRSF1A,RAC3,HSP90AB1,MMP9,GSTP1,AKT1
Female	KEGG	hsa05161		Hepatitis B	8	142	0.8	0.0021	KRAS,PRKCB,CASP3,MMP9,GRB2,YWHAZ,PRKCA,AKT1
Female	KEGG	hsa04210		Apoptosis	6	135	0.7	0.0099	TNFRSF1A,KRAS,HTRA2,CASP3,DIABLO,AKT1
Female	KEGG	hsa04215		Apoptosis - multiple species	4	31	1.16	0.0046	TNFRSF1A,HTRA2,CASP3,DIABLO
Female	KEGG	hsa05231		Choline metabolism in cancer	6	98	0.84	0.0046	KRAS,RAC3,PRKCB,GRB2,PRKCA,AKT1
Female	KEGG	hsa05220		Chronic myeloid leukemia	5	76	0.87	0.0064	KRAS,PTPN11,CRKL,GRB2,AKT1
Female	KEGG	hsa05210		Colorectal cancer	5	85	0.82	0.009	KRAS,RAC3,CASP3,GRB2,AKT1
Female	KEGG	hsa05214		Glioma	5	68	0.92	0.0047	KRAS,PRKCB,GRB2,PRKCA,AKT1
Female	KEGG	hsa04010		MAPK signaling pathway	12	293	0.66	0.00081	TNFRSF1A,KRAS,RAC3,PRKCB,PRKACA,CASP3,CRKL,FLNA,GRB2,PRKCA,EFNA4,AKT1
Female	KEGG	hsa05206		MicroRNAs in cancer	8	149	0.78	0.0025	BCL2L2,KRAS,PRKCB,CASP3,CRKL,MMP9,GRB2,PRKCA
Female	KEGG	hsa05223		Non-small cell lung cancer	5	66	0.93	0.0047	KRAS,PRKCB,GRB2,PRKCA,AKT1
Female	KEGG	hsa05200		Pathways in cancer	14	515	0.49	0.0046	IL2RB,KRAS,RAC3,PRKCB,PRKACA,CASP3,CRKL,HSP90AB1,MMP9,GRB2,GSTP1,PRKCA,AKT1,IL12RB1
Female	KEGG	hsa05215		Prostate cancer	6	97	0.84	0.0046	KRAS,HSP90AB1,MMP9,GRB2,GSTP1,AKT1
Female	KEGG	hsa05205		Proteoglycans in cancer	10	195	0.76	0.00081	KRAS,PRKCB,PRKACA,CASP3,PTPN11,FLNA,MMP9,GRB2,PRKCA,AKT1
Female	KEGG	hsa05211		Renal cell carcinoma	5	68	0.92	0.0047	KRAS,PTPN11,CRKL,GRB2,AKT1
Female	KEGG	hsa04360		Axon guidance	7	173	0.66	0.0085	EFNB2,KRAS,PLXNC1,RAC3,PTPN11,PRKCA,EFNA4
Female	KEGG	hsa04060		Cytokine-cytokine receptor interaction	10	263	0.63	0.0036	RELT,TNFRSF1A,IL2RB,LIF,EDAR,IL17RB,XCL1,MPL,TNFRSF1B,IL12RB1
Female	KEGG	hsa01521		EGFR tyrosine kinase inhibitor resistance	5	78	0.86	0.0067	KRAS,PRKCB,GRB2,PRKCA,AKT1
Female	KEGG	hsa04144		Endocytosis	9	242	0.62	0.0047	SPG21,IL2RB,CYTH4,SNX4,TSG101,VPS4A,SMAP1,CYTH2,ARFGAP2
Female	KEGG	hsa04012		ErbB signaling pathway	6	83	0.91	0.0034	KRAS,PRKCB,CRKL,GRB2,PRKCA,AKT1
Female	KEGG	hsa04664		Fc epsilon RI signaling pathway	7	67	1.07	0.00062	KRAS,RAC3,GRB2,PRKCA,LYN,AKT1,BTK
Female	KEGG	hsa04540		Gap junction	6	87	0.89	0.0036	KRAS,GJA1,PRKCB,PRKACA,GRB2,PRKCA
Female	KEGG	hsa04912		GnRH signaling pathway	5	88	0.81	0.0098	KRAS,PRKCB,PRKACA,GRB2,PRKCA
Female	KEGG	hsa04630		Jak-STAT signaling pathway	7	160	0.69	0.0064	IL2RB,LIF,PTPN11,MPL,GRB2,AKT1,IL12RB1
Female	KEGG	hsa04072		Phospholipase D signaling pathway	7	145	0.73	0.0047	CYTH4,KRAS,PTPN11,GRB2,CYTH2,PRKCA,AKT1
Female	KEGG	hsa04141		Protein processing in endoplasmic reticulum	7	161	0.69	0.0064	SEC61B,LMAN2,NPLOC4,RAD23B,UBQLN4,HSP90AB1,VIMP
Female	KEGG	hsa04014		Ras signaling pathway	9	228	0.65	0.0046	KRAS,RAC3,PRKCB,PRKACA,PTPN11,GRB2,PRKCA,EFNA4,AKT1
Female	KEGG	hsa04926		Relaxin signaling pathway	6	130	0.72	0.0095	KRAS,PRKACA,MMP9,GRB2,PRKCA,AKT1
Female	KEGG	hsa04071		Sphingolipid signaling pathway	7	116	0.83	0.0031	TNFRSF1A,KRAS,RAC3,PRKCB,CERS5,PRKCA,AKT1
Female	KEGG	hsa04668		TNF signaling pathway	6	108	0.8	0.0049	TNFRSF1A,LIF,CASP3,MMP9,TNFRSF1B,AKT1
Female	KEGG	hsa04370		VEGF signaling pathway	5	59	0.98	0.0046	KRAS,RAC3,PRKCB,PRKCA,AKT1
Female	Keyword	KW-0053		Apoptosis	15	530	0.5	0.0037	RELT,TNFRSF1A,BCL2L2,HTRA2,EDAR,MUL1,MZB1,PRKCB,CASP3,LCN2,TNFRSF1B,DIABLO,PRKCA,AKT1,BTK
Female	Keyword	KW-1003		Cell membrane	49	3214	0.23	0.0033	RELT,TNFRSF1A,IL2RB,TAX1BP3,ULBP1,PRTN3,SELL,PKD2,LYPD3,TREM1,EFNB2,CYTH4,KRAS,FOLH1,MRAP2,FCER2,TENM4,GJA1,CA2,IL17RB,FABP5,RAC3,OLR1,PRKACA,CD300C,PTP4A2,KEL,KIRREL2,SIGLEC14,SCAMP5,KIAA1324,SMAP1,HSP90AB1,MPL,ROR2,C6orf25,TNFRSF1B,RS1,MRAP,LRRTM4,CYTH2,PRKCA,EFNA4,LYN,AKT1,MRC1,NCAM1,SEZ6L2,BTK
Female	Keyword	KW-1015		Disulfide bond	60	3284	0.31	1.86e-06	TLL1,RELT,TNFRSF1A,MADCAM1,IL2RB,RETN,MPO,ULBP1,PRTN3,SELL,PKD2,TREM1,EFNB2,LIF,EDAR,PLXNC1,MSTN,CRISPLD2,DGCR2,FCER2,TENM4,GJA1,FRZB,FABP5,LMAN2,MZB1,PLG,OLR1,SIGLEC7,IGLL1,CD300C,PAPPA,PTP4A2,KEL,RAET1E,KIRREL2,SIGLEC14,FAIM3,XCL1,SMPDL3A,CUZD1,KIAA1324,MMP9,MPL,WFDC2,LCN2,ROR2,TNFRSF1B,RS1,SPOCK1,IL18BP,C17orf89,VSIG1,EFNA4,CST7,AKT1,MRC1,IL12RB1,NCAM1,SEZ6L2
Female	Keyword	KW-0325		Glycoprotein	68	4352	0.24	3.12e-05	TLL1,RELT,TNFRSF1A,MADCAM1,IL2RB,MPO,ULBP1,PRTN3,SELL,PKD2,LYPD3,TREM1,EFNB2,LIF,FOLH1,MRAP2,EDAR,PLXNC1,MSTN,CRISPLD2,DGCR2,P4HA1,FCER2,TENM4,IL17RB,FRZB,EVA1C,LMAN2,RAC3,PLG,OLR1,SIGLEC7,CERS5,FAM174B,CD300C,PAPPA,SERPINA6,KEL,RAET1E,KIRREL2,SIGLEC14,SMPDL3A,CUZD1,KIAA1324,HSP90AB1,MMP9,MPL,WFDC2,LCN2,TMEM57,ROR2,C6orf25,TNFRSF1B,MAMDC2,GOLM1,SPOCK1,IL18BP,GGT2,LRRTM4,VSIG1,EFNA4,CST7,TOR1AIP1,…
Female	Keyword	KW-0430		Lectin	9	162	0.8	0.0011	SELL,DGCR2,FCER2,EVA1C,LMAN2,OLR1,SIGLEC7,SIGLEC14,MRC1
Female	Keyword	KW-0472		Membrane	85	6985	0.14	0.0087	RELT,TNFRSF1A,HSD17B2,SPG21,MADCAM1,IL2RB,GNPNAT1,SEC61B,TAX1BP3,ULBP1,PRTN3,SELL,PKD2,RARRES1,LYPD3,TREM1,EFNB2,CYTH4,BCL2L2,SNX4,TSG101,VPS4A,KRAS,FOLH1,FAM189A2,MRAP2,HTRA2,EDAR,PLXNC1,DGCR2,FCER2,MUL1,TENM4,GJA1,CA2,IL17RB,FABP5,EVA1C,LMAN2,RAC3,PRKCB,OLR1,PRKACA,SIGLEC7,CERS5,FAM174B,CD300C,SNCA,PTP4A2,KEL,RAET1E,KIRREL2,SIGLEC14,SCAMP5,FAIM3,CUZD1,KIAA1324,SMAP1,OCRL,HSP90AB1,MPL,TMEM57,ROR…
Female	Keyword	KW-0964		Secreted	39	1814	0.38	1.86e-05	TLL1,TNFRSF1A,PRLH,RETN,PRTN3,TREM1,LIF,MSTN,CRISPLD2,FCER2,IL17RB,FRZB,FABP5,MZB1,PLG,OLR1,IGLL1,PAPPA,SNCA,SERPINA6,RAET1E,FAIM3,XCL1,SMPDL3A,HSP90AB1,MMP9,WFDC2,LCN2,TNFRSF1B,MAMDC2,RS1,LAD1,SPOCK1,IL18BP,OAS1,EFNA4,CST7,C19orf80,NCAM1
Female	Keyword	KW-0732		Signal	65	3236	0.35	1.16e-08	TLL1,RELT,TNFRSF1A,PRLH,MADCAM1,IL2RB,RETN,MPO,ULBP1,PRTN3,SELL,LYPD3,TREM1,EFNB2,LIF,FAM189A2,EDAR,PLXNC1,MSTN,CRISPLD2,DGCR2,P4HA1,IL17RB,FRZB,EVA1C,LMAN2,MZB1,PLG,RCN2,SIGLEC7,FAM174B,IGLL1,CD300C,PAPPA,SERPINA6,MSRB3,RAET1E,KIRREL2,SIGLEC14,FAIM3,XCL1,SMPDL3A,CUZD1,KIAA1324,MMP9,MPL,WFDC2,LCN2,ROR2,C6orf25,TNFRSF1B,MAMDC2,RS1,SPOCK1,IL18BP,GGT2,LRRTM4,VSIG1,EFNA4,CST7,MRC1,IL12RB1,C19orf80,NC…
Female	Process	GO:0050853		B cell receptor signaling pathway	4	34	1.12	0.0065	PRKCB,IGLL1,LYN,BTK
Female	Process	GO:0007596		blood coagulation	11	288	0.63	0.0021	PRTN3,PRKCB,PLG,PRKACA,PTPN11,FLNA,MPL,C6orf25,YWHAZ,PRKCA,LYN
Female	Process	GO:0006952		defense response	28	1234	0.41	0.00031	RELT,TNFRSF1A,MPO,ULBP1,KLRK1,TREM1,GJA1,IL17RB,OLR1,TOLLIP,IGLL1,CD300C,SNCA,RAET1E,SIGLEC14,FAIM3,XCL1,TNFRSF6B,LCN2,TNFRSF1B,GRB2,OAS1,LYN,AKT1,MRC1,IL12RB1,NCAM1,BTK
Female	Process	GO:0098542		defense response to other organism	19	859	0.4	0.0056	TNFRSF1A,MPO,ULBP1,KLRK1,TREM1,TOLLIP,IGLL1,SNCA,RAET1E,SIGLEC14,XCL1,LCN2,GRB2,OAS1,LYN,MRC1,IL12RB1,NCAM1,BTK
Female	Process	GO:0010001		glial cell differentiation	8	154	0.77	0.0026	KRAS,TENM4,PTPN11,ROR2,GSTP1,EIF2B1,LYN,AKT1
Female	Process	GO:0002252		immune effector process	24	927	0.46	0.00021	RETN,MPO,ULBP1,PRTN3,SELL,KLRK1,CRISPLD2,FABP5,OLR1,PSMD1,TOLLIP,IGLL1,RAET1E,SIGLEC14,HSP90AB1,MMP9,LCN2,TNFRSF1B,GRB2,NME1-NME2,GSTP1,OAS1,LYN,BTK
Female	Process	GO:0006955		immune response	38	1560	0.44	3.32e-06	RELT,TNFRSF1A,MADCAM1,RETN,MPO,ULBP1,PRTN3,SELL,KLRK1,TREM1,LIF,CRISPLD2,FABP5,PRKCB,OLR1,PSMD1,TOLLIP,IGLL1,SNCA,RAET1E,SIGLEC14,XCL1,TNFRSF6B,HSP90AB1,MMP9,LCN2,TNFRSF1B,GRB2,NME1-NME2,GSTP1,IL18BP,OAS1,CST7,LYN,MRC1,IL12RB1,NCAM1,BTK
Female	Process	GO:0002429		immune response-activating cell surface receptor signaling pathway	11	234	0.72	0.00053	SPG21,KLRK1,KRAS,PRKCB,PRKACA,IGLL1,HSP90AB1,GRB2,EIF2B1,LYN,BTK
Female	Process	GO:0002376		immune system process	55	2370	0.42	1.03e-08	RELT,TNFRSF1A,SPG21,MADCAM1,RETN,MPO,ULBP1,PRTN3,SELL,KLRK1,BATF3,TREM1,LIF,KRAS,HNF1A,CRISPLD2,FABP5,PRKCB,OLR1,PSMD1,PRKACA,CASP3,TOLLIP,IGLL1,CD300C,SNCA,PTPN11,CRKL,RAET1E,SIGLEC14,FAIM3,XCL1,TNFRSF6B,HSP90AB1,MMP9,MPL,LCN2,IGBP1,ROR2,C6orf25,TNFRSF1B,GRB2,NME1-NME2,GSTP1,IL18BP,OAS1,EFNA4,EIF2B1,CST7,LYN,AKT1,MRC1,IL12RB1,NCAM1,BTK
Female	Process	GO:0045087		innate immune response	17	676	0.45	0.0035	ULBP1,KLRK1,TREM1,TOLLIP,IGLL1,SNCA,RAET1E,SIGLEC14,XCL1,LCN2,GRB2,OAS1,LYN,MRC1,IL12RB1,NCAM1,BTK
Female	Process	GO:0045321		leukocyte activation	25	894	0.5	4.57e-05	RETN,MPO,ULBP1,PRTN3,SELL,KLRK1,BATF3,HNF1A,CRISPLD2,FABP5,PRKCB,OLR1,PSMD1,TOLLIP,SNCA,SIGLEC14,HSP90AB1,MMP9,LCN2,IGBP1,TNFRSF1B,NME1-NME2,GSTP1,LYN,BTK
Female	Process	GO:0043299		leukocyte degranulation	18	507	0.6	7.33e-05	RETN,MPO,PRTN3,SELL,CRISPLD2,FABP5,OLR1,PSMD1,TOLLIP,SIGLEC14,HSP90AB1,MMP9,LCN2,TNFRSF1B,NME1-NME2,GSTP1,LYN,BTK
Female	Process	GO:0002443		leukocyte mediated immunity	22	632	0.59	1.05e-05	RETN,MPO,ULBP1,PRTN3,SELL,KLRK1,CRISPLD2,FABP5,OLR1,PSMD1,TOLLIP,IGLL1,RAET1E,SIGLEC14,HSP90AB1,MMP9,LCN2,TNFRSF1B,NME1-NME2,GSTP1,LYN,BTK
Female	Process	GO:0050900		leukocyte migration	12	296	0.66	0.00073	MADCAM1,PRTN3,SELL,TREM1,OLR1,IGLL1,PTPN11,XCL1,MMP9,ROR2,GRB2,LYN
Female	Process	GO:0002275		myeloid cell activation involved in immune response	18	519	0.59	9.92e-05	RETN,MPO,PRTN3,SELL,CRISPLD2,FABP5,OLR1,PSMD1,TOLLIP,SIGLEC14,HSP90AB1,MMP9,LCN2,TNFRSF1B,NME1-NME2,GSTP1,LYN,BTK
Female	Process	GO:0030099		myeloid cell differentiation	8	203	0.65	0.0095	PRTN3,BATF3,CASP3,PTPN11,MMP9,C6orf25,EFNA4,LYN
Female	Process	GO:0002274		myeloid leukocyte activation	20	574	0.59	2.87e-05	RETN,MPO,PRTN3,SELL,BATF3,CRISPLD2,FABP5,OLR1,PSMD1,TOLLIP,SNCA,SIGLEC14,HSP90AB1,MMP9,LCN2,TNFRSF1B,NME1-NME2,GSTP1,LYN,BTK
Female	Process	GO:0002444		myeloid leukocyte mediated immunity	18	519	0.59	9.92e-05	RETN,MPO,PRTN3,SELL,CRISPLD2,FABP5,OLR1,PSMD1,TOLLIP,SIGLEC14,HSP90AB1,MMP9,LCN2,TNFRSF1B,NME1-NME2,GSTP1,LYN,BTK
Female	Process	GO:0043312		neutrophil degranulation	16	485	0.57	0.00047	RETN,MPO,PRTN3,SELL,CRISPLD2,FABP5,OLR1,PSMD1,TOLLIP,SIGLEC14,HSP90AB1,MMP9,LCN2,TNFRSF1B,NME1-NME2,GSTP1
Female	Process	GO:0030168		platelet activation	8	120	0.87	0.0007	PRKCB,PTPN11,FLNA,MPL,C6orf25,YWHAZ,PRKCA,LYN
Female	Process	GO:0031349	(+)	regulation of defense response	11	365	0.53	0.0088	TNFRSF1A,KLRK1,SNX4,KRAS,GJA1,IL17RB,PRKACA,SNCA,RAET1E,LYN,BTK
Female	Process	GO:0031347		regulation of defense response	21	676	0.54	7.26e-05	TNFRSF1A,KLRK1,NR1D1,SNX4,KRAS,MUL1,GJA1,IL17RB,PRKACA,NPLOC4,SNCA,PTPN11,RAET1E,XCL1,HSP90AB1,TNFRSF1B,VIMP,GSTP1,LYN,IL12RB1,BTK
Female	Process	GO:0002697		regulation of immune effector process	11	362	0.53	0.0084	KLRK1,SNX4,FCER2,MUL1,MZB1,NPLOC4,RAET1E,XCL1,LYN,IL12RB1,BTK
Female	Process	GO:0002699	(+)	regulation of immune effector process	9	186	0.74	0.0019	KLRK1,SNX4,FCER2,MZB1,RAET1E,XCL1,LYN,IL12RB1,BTK
Female	Process	GO:0050778	(+)	regulation of immune response	16	589	0.48	0.0025	SPG21,KLRK1,SNX4,KRAS,FCER2,PRKCB,PRKACA,IGLL1,RAET1E,XCL1,HSP90AB1,GRB2,EIF2B1,LYN,IL12RB1,BTK
Female	Process	GO:0050776		regulation of immune response	27	873	0.54	4.22e-06	SPG21,MADCAM1,ULBP1,SELL,KLRK1,TREM1,NR1D1,SNX4,KRAS,FCER2,MUL1,PRKCB,PRKACA,SIGLEC7,IGLL1,CD300C,NPLOC4,PTPN11,RAET1E,XCL1,HSP90AB1,GRB2,VIMP,EIF2B1,LYN,IL12RB1,BTK
Female	Process	GO:0002682		regulation of immune system process	37	1391	0.48	8.22e-07	SPG21,MADCAM1,ULBP1,SELL,KLRK1,TREM1,NR1D1,LIF,SNX4,KRAS,FCER2,MUL1,CA2,MZB1,PRKCB,PRKACA,CASP3,SIGLEC7,IGLL1,CD300C,NPLOC4,SNCA,PTPN11,RAET1E,XCL1,SMAP1,HSP90AB1,MPL,ROR2,GRB2,VIMP,PRKCA,EIF2B1,LYN,AKT1,IL12RB1,BTK
Female	Process	GO:0002684	(+)	regulation of immune system process	26	882	0.52	1.45e-05	SPG21,MADCAM1,KLRK1,LIF,SNX4,KRAS,FCER2,CA2,MZB1,PRKCB,PRKACA,IGLL1,PTPN11,RAET1E,XCL1,SMAP1,HSP90AB1,MPL,ROR2,GRB2,PRKCA,EIF2B1,LYN,AKT1,IL12RB1,BTK
Female	Process	GO:0045088		regulation of innate immune response	11	361	0.53	0.0083	KLRK1,NR1D1,KRAS,MUL1,PRKACA,NPLOC4,PTPN11,RAET1E,HSP90AB1,LYN,BTK
Female	Process	GO:0002694		regulation of leukocyte activation	14	470	0.52	0.0027	KLRK1,SNX4,MZB1,CASP3,IGLL1,SNCA,PTPN11,XCL1,MPL,GRB2,LYN,AKT1,IL12RB1,BTK
Female	Process	GO:0002696	(+)	regulation of leukocyte activation	11	298	0.62	0.0026	KLRK1,SNX4,IGLL1,PTPN11,XCL1,MPL,GRB2,LYN,AKT1,IL12RB1,BTK
Female	Process	GO:0001912	(+)	regulation of leukocyte mediated cytotoxicity	4	38	1.07	0.0086	KLRK1,RAET1E,XCL1,IL12RB1
Female	Process	GO:0002703		regulation of leukocyte mediated immunity	8	176	0.71	0.0049	KLRK1,SNX4,FCER2,RAET1E,XCL1,LYN,IL12RB1,BTK
Female	Process	GO:0002705	(+)	regulation of leukocyte mediated immunity	7	109	0.86	0.0022	KLRK1,SNX4,FCER2,RAET1E,XCL1,IL12RB1,BTK
Female	Process	GO:0051249		regulation of lymphocyte activation	12	401	0.53	0.006	KLRK1,MZB1,CASP3,IGLL1,PTPN11,XCL1,MPL,GRB2,LYN,AKT1,IL12RB1,BTK
Female	Process	GO:0051251	(+)	regulation of lymphocyte activation	10	260	0.64	0.0036	KLRK1,IGLL1,PTPN11,XCL1,MPL,GRB2,LYN,AKT1,IL12RB1,BTK
Female	Process	GO:0002708	(+)	regulation of lymphocyte mediated immunity	6	88	0.88	0.0042	KLRK1,FCER2,RAET1E,XCL1,IL12RB1,BTK
Female	Process	GO:0045651	(+)	regulation of macrophage differentiation	3	14	1.38	0.0076	LIF,ROR2,PRKCA
Female	Process	GO:1903902	(+)	regulation of viral life cycle	5	59	0.98	0.0052	TSG101,VPS4A,PPIH,PC,CHMP3
Female	Process	GO:1902188	(+)	regulation of viral release from host cell	4	17	1.42	0.0011	TSG101,VPS4A,PC,CHMP3
Female	Process	GO:0009617		response to bacterium	17	555	0.54	0.00057	RELT,TNFRSF1A,MPO,KLRK1,NR1D1,GJA1,CASP3,IGLL1,SNCA,TNFRSF6B,TNFRSF1B,VIMP,GSTP1,IL18BP,LYN,AKT1,MRC1
Female	Process	GO:0051707		response to other organism	32	1173	0.49	3.91e-06	RELT,TNFRSF1A,MPO,ULBP1,PRTN3,KLRK1,BATF3,TREM1,NR1D1,GJA1,CASP3,TOLLIP,IGLL1,SNCA,RAET1E,SIGLEC14,XCL1,TNFRSF6B,LCN2,TNFRSF1B,GRB2,VIMP,GSTP1,IL18BP,OAS1,LYN,AKT1,MRC1,IL12RB1,TPT1,NCAM1,BTK
Female	Process	GO:0031295		T cell costimulation	5	52	1.03	0.0036	KLRK1,PTPN11,GRB2,LYN,AKT1
Female	Process	GO:0019058		viral life cycle	8	166	0.73	0.0038	EFNB2,TSG101,VPS4A,HSP90AB1,PC,CHMP3,MRC1,NCAM1
Female	Process	GO:0019068		virion assembly	4	37	1.08	0.0081	TSG101,VPS4A,PC,CHMP3
Female	Process	GO:0042060		wound healing	14	461	0.53	0.0023	PRTN3,MSTN,GJA1,PRKCB,PLG,PRKACA,CASP3,PTPN11,FLNA,MPL,C6orf25,YWHAZ,PRKCA,LYN
Female	Process	GO:0048856		anatomical structure development	67	5085	0.17	0.0047	TLL1,RELT,TNFRSF1A,PRLH,HSD17B2,GNPNAT1,PRTN3,PKD2,BATF3,PIWIL1,EFNB2,LIF,BCL2L2,TSG101,VPS4A,KRAS,HNF1A,HTRA2,EDAR,PLXNC1,MSTN,AARS,PHF3,CRISPLD2,DGCR2,MUL1,TENM4,GJA1,CA2,AKR1B1,FRZB,FABP5,RAC3,PRKACA,CASP3,TOLLIP,CEP57,NUDC,PTPN11,CRKL,KEL,RAD23B,SMYD2,GORAB,FLNA,TNFRSF6B,OCRL,HSP90AB1,MMP9,TMEM57,ROR2,C6orf25,TNFRSF1B,RS1,GRB2,SPOCK1,GSTP1,VSIG1,PRKCA,EFNA4,EIF2B1,LYN,GSTK1,AKT1,C19orf80,NCAM…
Female	Process	GO:0048513		animal organ development	44	2926	0.23	0.0056	TNFRSF1A,HSD17B2,GNPNAT1,PRTN3,PKD2,BATF3,LIF,BCL2L2,TSG101,KRAS,HNF1A,HTRA2,EDAR,MSTN,AARS,CRISPLD2,DGCR2,TENM4,GJA1,CA2,AKR1B1,FRZB,RAC3,CASP3,PTPN11,CRKL,KEL,RAD23B,SMYD2,GORAB,FLNA,HSP90AB1,MMP9,TMEM57,ROR2,C6orf25,TNFRSF1B,RS1,GRB2,GSTP1,EFNA4,LYN,AKT1,BTK
Female	Process	GO:0065007		biological regulation	134	11740	0.11	0.00012	GABARAPL2,RELT,TNFRSF1A,PRLH,HSD17B2,SPG21,MADCAM1,IL2RB,ORC6,RETN,SEC61B,MPO,TAX1BP3,ULBP1,PRTN3,SELL,PKD2,RARRES1,KLRK1,BATF3,TREM1,PIWIL1,EFNB2,NR1D1,CYTH4,LIF,BCL2L2,SNX4,TSG101,VPS4A,CSNK1G2,KRAS,HNF1A,MRAP2,HTRA2,EDAR,PLXNC1,MSTN,AARS,FCER2,MUL1,SF3B4,TENM4,GJA1,CA2,AKR1B1,IL17RB,FRZB,FABP5,SDHAF2,PAIP1,LMAN2,MZB1,RAC3,PRKCB,PPIH,PLG,PSMD1,PRKACA,CASP3,TOLLIP,CEP57,SIGLEC7,IGLL1,CD300C,NPLO…
Female	Process	GO:0048468		cell development	29	1493	0.34	0.002	PIWIL1,EFNB2,LIF,KRAS,HTRA2,MSTN,TENM4,GJA1,RAC3,PRKACA,CASP3,CEP57,PTPN11,KEL,FLNA,HSP90AB1,ROR2,C6orf25,GRB2,GSTP1,VSIG1,PRKCA,EFNA4,EIF2B1,LYN,AKT1,C19orf80,NCAM1,BTK
Female	Process	GO:0030154		cell differentiation	49	3457	0.2	0.0081	TLL1,PRLH,RETN,PRTN3,KLRK1,BATF3,PIWIL1,EFNB2,NR1D1,LIF,TSG101,KRAS,HNF1A,HTRA2,EDAR,PLXNC1,MSTN,MUL1,TENM4,GJA1,FRZB,RAC3,PRKACA,CASP3,TOLLIP,CEP57,PTPN11,CRKL,KEL,FLNA,GOT1,HSP90AB1,MMP9,ROR2,C6orf25,GRB2,SPOCK1,GSTP1,VSIG1,PRKCA,EFNA4,EIF2B1,LYN,GSTK1,AKT1,TPT1,C19orf80,NCAM1,BTK
Female	Process	GO:0016477		cell migration	18	812	0.4	0.0074	MADCAM1,PRTN3,SELL,TREM1,EFNB2,GJA1,OLR1,IGLL1,PTPN11,CDC42BPA,XCL1,CUZD1,FLNA,MMP9,ROR2,GRB2,SPOCK1,LYN
Female	Process	GO:0016043		cellular component organization	67	5163	0.16	0.0065	GABARAPL2,TLL1,TNFRSF1A,HSD17B10,PSMD5,MADCAM1,IL2RB,MRPL32,MPO,PRTN3,PKD2,PIWIL1,EFNB2,SNX4,TSG101,VPS4A,KRAS,HTRA2,CRISPLD2,P4HA1,MUL1,TENM4,GJA1,SDHAF2,MZB1,RAC3,PRKCB,PPIH,PLG,PRKACA,CASP3,CEP57,IGLL1,NPLOC4,SNCA,PTPN11,KEL,RAD23B,CDC42BPA,SMYD2,GORAB,UBL4A,FLNA,KIAA1324,OCRL,HSP90AB1,MMP9,C6orf25,RS1,BRPF1,GOLM1,GRB2,YWHAZ,OAS1,C17orf89,VSIG1,CHMP3,CNEP1R1,CYTH2,PRKCA,EFNA4,LYN,GSTK1,TOR1AIP…
Female	Process	GO:0009987		cellular process	152	14652	0.07	0.0013	GABARAPL2,TLL1,RELT,TNFRSF1A,PRLH,HSD17B10,HSD17B2,SPG21,PSMD5,MADCAM1,IL2RB,GNPNAT1,ORC6,RETN,MRPL32,SEC61B,MPO,TAX1BP3,ULBP1,PRTN3,SELL,PKD2,KLRK1,BATF3,TREM1,PIWIL1,EFNB2,NR1D1,LIF,BCL2L2,SNX4,TSG101,VPS4A,CSNK1G2,KRAS,FOLH1,HNF1A,MRAP2,HTRA2,EDAR,PLXNC1,MSTN,AARS,EIF3J,PHF3,CRISPLD2,P4HA1,FCER2,MUL1,SF3B4,TENM4,GJA1,CA2,AKR1B1,IL17RB,FRZB,FABP5,SDHAF2,PAIP1,MZB1,RAC3,PRKCB,PPIH,PLG,OLR1,PSMD1…
Female	Process	GO:0032502		developmental process	74	5401	0.19	0.0007	TLL1,RELT,TNFRSF1A,PRLH,HSD17B2,GNPNAT1,RETN,MPO,PRTN3,PKD2,KLRK1,BATF3,PIWIL1,EFNB2,NR1D1,LIF,BCL2L2,TSG101,VPS4A,KRAS,HNF1A,HTRA2,EDAR,PLXNC1,MSTN,AARS,PHF3,CRISPLD2,DGCR2,MUL1,TENM4,GJA1,CA2,AKR1B1,FRZB,FABP5,RAC3,PRKACA,CASP3,TOLLIP,CEP57,NUDC,SNCA,PTPN11,CRKL,KEL,RAD23B,SMYD2,GORAB,FLNA,TNFRSF6B,GOT1,OCRL,HSP90AB1,MMP9,TMEM57,ROR2,C6orf25,TNFRSF1B,RS1,GRB2,SPOCK1,GSTP1,VSIG1,PRKCA,EFNA4,EIF2…
Female	Process	GO:0021782		glial cell development	7	91	0.94	0.00089	KRAS,TENM4,ROR2,GSTP1,EIF2B1,LYN,AKT1
Female	Process	GO:0048872		homeostasis of number of cells	8	193	0.67	0.0076	KRAS,RAC3,CASP3,PTPN11,MPL,C6orf25,LYN,AKT1
Female	Process	GO:0040011		locomotion	22	1144	0.33	0.0097	MADCAM1,PRTN3,SELL,TREM1,EFNB2,VPS4A,GJA1,OLR1,IGLL1,PTPN11,CDC42BPA,XCL1,CUZD1,FLNA,MMP9,ROR2,GRB2,SPOCK1,PRKCA,EFNA4,LYN,NCAM1
Female	Process	GO:0051704		multi-organism process	51	2514	0.36	2.7e-06	RELT,TNFRSF1A,IL2RB,MPO,ULBP1,PRTN3,KLRK1,BATF3,TREM1,PIWIL1,EFNB2,NR1D1,LIF,BCL2L2,TSG101,VPS4A,KRAS,GJA1,AKR1B1,PLG,PRKACA,CASP3,TOLLIP,CEP57,IGLL1,PAPPA,SNCA,RAET1E,RAD23B,SIGLEC14,XCL1,TNFRSF6B,HSP90AB1,MMP9,WFDC2,LCN2,TNFRSF1B,GRB2,PC,VIMP,GSTP1,IL18BP,OAS1,CHMP3,LYN,AKT1,MRC1,IL12RB1,TPT1,NCAM1,BTK
Female	Process	GO:0014003		oligodendrocyte development	4	39	1.06	0.0091	TENM4,GSTP1,EIF2B1,LYN
Female	Process	GO:0001890		placenta development	7	145	0.73	0.0074	HSD17B2,PKD2,LIF,GJA1,HSP90AB1,GRB2,AKT1
Female	Process	GO:0050789		regulation of biological process	129	11116	0.12	0.00012	GABARAPL2,RELT,TNFRSF1A,PRLH,SPG21,MADCAM1,IL2RB,ORC6,RETN,MPO,TAX1BP3,ULBP1,PRTN3,SELL,PKD2,RARRES1,KLRK1,BATF3,TREM1,PIWIL1,EFNB2,NR1D1,CYTH4,LIF,BCL2L2,SNX4,TSG101,VPS4A,CSNK1G2,KRAS,HNF1A,MRAP2,HTRA2,EDAR,PLXNC1,MSTN,AARS,FCER2,MUL1,SF3B4,TENM4,GJA1,CA2,AKR1B1,IL17RB,FRZB,FABP5,SDHAF2,PAIP1,LMAN2,MZB1,RAC3,PRKCB,PPIH,PLG,PSMD1,PRKACA,CASP3,TOLLIP,CEP57,SIGLEC7,IGLL1,CD300C,NPLOC4,SNCA,PTPN11,…
Female	Process	GO:0048518	(+)	regulation of biological process	76	5459	0.19	0.00036	TNFRSF1A,SPG21,MADCAM1,RETN,PRTN3,PKD2,KLRK1,EFNB2,NR1D1,LIF,SNX4,TSG101,VPS4A,KRAS,HNF1A,MRAP2,HTRA2,EDAR,PLXNC1,MSTN,FCER2,MUL1,SF3B4,TENM4,GJA1,CA2,AKR1B1,IL17RB,FRZB,FABP5,PAIP1,LMAN2,MZB1,RAC3,PRKCB,PPIH,PLG,PRKACA,CASP3,TOLLIP,IGLL1,SNCA,PTPN11,CRKL,RAET1E,SCAMP5,GORAB,XCL1,FLNA,KIAA1324,SMAP1,GOT1,HSP90AB1,MMP9,MPL,ROR2,TNFRSF1B,BRPF1,GRB2,NME1-NME2,PC,YWHAZ,GSTP1,MRAP,DIABLO,CHMP3,CNEP1R1…
Female	Process	GO:0048519	(-)	regulation of biological process	79	4953	0.25	2.61e-06	GABARAPL2,TNFRSF1A,IL2RB,ORC6,RETN,MPO,TAX1BP3,PRTN3,PKD2,RARRES1,KLRK1,BATF3,PIWIL1,EFNB2,NR1D1,LIF,BCL2L2,TSG101,VPS4A,KRAS,MRAP2,HTRA2,PLXNC1,MSTN,AARS,MUL1,GJA1,AKR1B1,FRZB,FABP5,SDHAF2,PAIP1,MZB1,PRKCB,PLG,PRKACA,CASP3,NPLOC4,SNCA,PTPN11,SERPINA6,CRKL,KEL,KIRREL2,SCAMP5,SMYD2,FAIM3,RGS18,XCL1,UBQLN4,FLNA,TNFRSF6B,GOT1,HSP90AB1,MMP9,WFDC2,IGBP1,ROR2,C6orf25,TNFRSF1B,GRB2,NME1-NME2,PC,SPOCK1,Y…
Female	Process	GO:0065008		regulation of biological quality	53	3559	0.22	0.002	PRLH,HSD17B2,RETN,PRTN3,PKD2,KLRK1,NR1D1,LIF,SNX4,CSNK1G2,KRAS,HNF1A,MRAP2,PLXNC1,MSTN,AARS,MUL1,GJA1,CA2,AKR1B1,FABP5,PAIP1,RAC3,PRKCB,PLG,PRKACA,CASP3,SNCA,PTPN11,SERPINA6,KEL,XCL1,FLNA,SMAP1,GOT1,HSP90AB1,MPL,LCN2,C6orf25,TNFRSF1B,GRB2,YWHAZ,VIMP,GSTP1,OAS1,VSIG1,PRKCA,LYN,AKT1,CIRBP,TPT1,C19orf80,BTK
Female	Process	GO:0050878		regulation of body fluid levels	13	483	0.48	0.0082	PRTN3,GJA1,AKR1B1,PRKCB,PLG,PRKACA,PTPN11,FLNA,MPL,C6orf25,YWHAZ,PRKCA,LYN
Female	Process	GO:0045595		regulation of cell differentiation	30	1695	0.3	0.0051	TNFRSF1A,EFNB2,NR1D1,LIF,KRAS,PLXNC1,MSTN,MUL1,TENM4,GJA1,CA2,FRZB,SDHAF2,RAC3,PRKCB,PRKACA,CRKL,KEL,FLNA,SMAP1,HSP90AB1,MPL,ROR2,NME1-NME2,SPOCK1,PRKCA,LYN,AKT1,IL12RB1,BTK
Female	Process	GO:0045597	(+)	regulation of cell differentiation	21	908	0.42	0.0021	EFNB2,LIF,PLXNC1,MUL1,TENM4,GJA1,CA2,FRZB,RAC3,CRKL,FLNA,SMAP1,HSP90AB1,MPL,ROR2,NME1-NME2,PRKCA,LYN,AKT1,IL12RB1,BTK
Female	Process	GO:0042127		regulation of cell population proliferation	35	1594	0.39	5.37e-05	RELT,TNFRSF1A,TAX1BP3,PRTN3,PKD2,RARRES1,EFNB2,NR1D1,LIF,TSG101,KRAS,MSTN,GJA1,AKR1B1,FRZB,MZB1,PLG,CASP3,CRKL,SMYD2,XCL1,FLNA,TNFRSF6B,MMP9,MPL,ROR2,TNFRSF1B,GRB2,NME1-NME2,GSTP1,PRKCA,LYN,AKT1,IL12RB1,BTK
Female	Process	GO:0008285	(-)	regulation of cell population proliferation	16	669	0.43	0.0071	TAX1BP3,PKD2,RARRES1,LIF,TSG101,MSTN,GJA1,FRZB,PLG,CASP3,SMYD2,XCL1,ROR2,GSTP1,LYN,BTK
Female	Process	GO:0050794		regulation of cellular process	122	10484	0.12	0.00036	GABARAPL2,RELT,TNFRSF1A,PRLH,SPG21,MADCAM1,IL2RB,ORC6,RETN,MPO,TAX1BP3,PRTN3,PKD2,RARRES1,KLRK1,BATF3,TREM1,PIWIL1,EFNB2,NR1D1,CYTH4,LIF,BCL2L2,SNX4,TSG101,VPS4A,CSNK1G2,KRAS,HNF1A,MRAP2,HTRA2,EDAR,PLXNC1,MSTN,AARS,FCER2,MUL1,SF3B4,TENM4,GJA1,CA2,AKR1B1,IL17RB,FRZB,FABP5,SDHAF2,PAIP1,LMAN2,MZB1,RAC3,PRKCB,PLG,PRKACA,CASP3,TOLLIP,CEP57,SIGLEC7,IGLL1,CD300C,NPLOC4,SNCA,PTPN11,SERPINA6,CRKL,KEL,RAD2…
Female	Process	GO:0048522	(+)	regulation of cellular process	69	4898	0.2	0.00067	TNFRSF1A,MADCAM1,RETN,PRTN3,PKD2,KLRK1,EFNB2,NR1D1,LIF,SNX4,TSG101,VPS4A,KRAS,HNF1A,MRAP2,HTRA2,EDAR,PLXNC1,MSTN,MUL1,SF3B4,TENM4,GJA1,CA2,AKR1B1,IL17RB,FRZB,FABP5,PAIP1,LMAN2,MZB1,RAC3,PRKCB,PLG,PRKACA,CASP3,TOLLIP,IGLL1,SNCA,PTPN11,CRKL,SCAMP5,GORAB,XCL1,FLNA,KIAA1324,SMAP1,GOT1,HSP90AB1,MMP9,MPL,ROR2,TNFRSF1B,BRPF1,GRB2,NME1-NME2,YWHAZ,GSTP1,MRAP,DIABLO,CNEP1R1,PRKCA,LYN,AKT1,CIRBP,IL12RB1,ANA…
Female	Process	GO:0050793		regulation of developmental process	38	2416	0.25	0.0065	TNFRSF1A,PRLH,RETN,EFNB2,NR1D1,LIF,CSNK1G2,KRAS,HTRA2,PLXNC1,MSTN,MUL1,TENM4,GJA1,CA2,FRZB,SDHAF2,RAC3,PRKCB,PRKACA,SNCA,PTPN11,CRKL,KEL,GORAB,FLNA,SMAP1,HSP90AB1,MPL,ROR2,TNFRSF1B,NME1-NME2,SPOCK1,PRKCA,LYN,AKT1,IL12RB1,BTK
Female	Process	GO:0051094	(+)	regulation of developmental process	27	1286	0.37	0.0011	TNFRSF1A,RETN,EFNB2,LIF,KRAS,PLXNC1,MUL1,TENM4,GJA1,CA2,FRZB,RAC3,PRKCB,CRKL,GORAB,FLNA,SMAP1,HSP90AB1,MPL,ROR2,TNFRSF1B,NME1-NME2,PRKCA,LYN,AKT1,IL12RB1,BTK
Female	Process	GO:1903708	(+)	regulation of hemopoiesis	8	177	0.71	0.0051	LIF,CA2,SMAP1,MPL,ROR2,PRKCA,IL12RB1,BTK
Female	Process	GO:0040017	(+)	regulation of locomotion	14	503	0.5	0.0045	MADCAM1,TSG101,VPS4A,PLG,CRKL,XCL1,FLNA,MMP9,ROR2,PC,CHMP3,PRKCA,LYN,AKT1
Female	Process	GO:0051239		regulation of multicellular organismal process	46	2788	0.27	0.00076	TNFRSF1A,PRLH,RETN,KLRK1,EFNB2,LIF,SNX4,HTRA2,PLXNC1,MSTN,MUL1,TENM4,GJA1,CA2,IL17RB,FRZB,FABP5,SDHAF2,RAC3,PRKCB,PLG,PRKACA,NPLOC4,SNCA,PTPN11,CRKL,KEL,SCAMP5,GORAB,XCL1,FLNA,SMAP1,HSP90AB1,MMP9,MPL,ROR2,TNFRSF1B,NME1-NME2,SPOCK1,VIMP,GSTP1,PRKCA,LYN,AKT1,IL12RB1,BTK
Female	Process	GO:0051240	(+)	regulation of multicellular organismal process	28	1551	0.31	0.0057	RETN,KLRK1,EFNB2,LIF,SNX4,PLXNC1,MUL1,TENM4,GJA1,CA2,IL17RB,PRKCB,PLG,CRKL,SCAMP5,GORAB,XCL1,FLNA,SMAP1,MMP9,MPL,ROR2,NME1-NME2,PRKCA,LYN,AKT1,IL12RB1,BTK
Female	Process	GO:0043900		regulation of multi-organism process	21	653	0.56	4.61e-05	MPO,KLRK1,NR1D1,TSG101,VPS4A,KRAS,FCER2,MUL1,PPIH,PRKACA,NPLOC4,PTPN11,RAET1E,HSP90AB1,PC,OAS1,CHMP3,PRKCA,LYN,IL12RB1,BTK
Female	Process	GO:0043902	(+)	regulation of multi-organism process	13	394	0.57	0.002	KLRK1,TSG101,VPS4A,KRAS,FCER2,PPIH,PRKACA,RAET1E,PC,CHMP3,PRKCA,LYN,BTK
Female	Process	GO:0045639	(+)	regulation of myeloid cell differentiation	6	89	0.88	0.0044	LIF,CA2,SMAP1,MPL,ROR2,PRKCA
Female	Process	GO:0022610		biological adhesion	19	849	0.4	0.0051	MADCAM1,SELL,LYPD3,EFNB2,PLXNC1,DGCR2,TENM4,OLR1,SIGLEC7,KIRREL2,SIGLEC14,CUZD1,HSP90AB1,MPL,RS1,NME1-NME2,SPOCK1,PRKCA,NCAM1
Female	Process	GO:0001775		cell activation	31	1024	0.53	1.03e-06	RETN,MPO,ULBP1,PRTN3,SELL,KLRK1,BATF3,HNF1A,CRISPLD2,FABP5,PRKCB,OLR1,PSMD1,TOLLIP,SNCA,PTPN11,SIGLEC14,FLNA,HSP90AB1,MMP9,MPL,LCN2,IGBP1,C6orf25,TNFRSF1B,NME1-NME2,YWHAZ,GSTP1,PRKCA,LYN,BTK
Female	Process	GO:0007155		cell adhesion	18	843	0.38	0.0097	MADCAM1,SELL,LYPD3,EFNB2,PLXNC1,DGCR2,TENM4,OLR1,SIGLEC7,KIRREL2,SIGLEC14,CUZD1,MPL,RS1,NME1-NME2,SPOCK1,PRKCA,NCAM1
Female	Process	GO:0007154		cell communication	80	5219	0.24	6.74e-06	GABARAPL2,RELT,TNFRSF1A,PRLH,SPG21,MADCAM1,IL2RB,TAX1BP3,PRTN3,PKD2,KLRK1,TREM1,EFNB2,NR1D1,LIF,BCL2L2,CSNK1G2,KRAS,HNF1A,HTRA2,EDAR,PLXNC1,MSTN,FCER2,MUL1,TENM4,GJA1,CA2,AKR1B1,IL17RB,FRZB,RAC3,PRKCB,PRKACA,CASP3,TOLLIP,CEP57,SIGLEC7,IGLL1,CD300C,SNCA,PTPN11,CRKL,CDC42BPA,RGS18,XCL1,FLNA,KIAA1324,TNFRSF6B,GOT1,OCRL,HSP90AB1,MMP9,MPL,LCN2,TMEM57,IGBP1,ROR2,C6orf25,TNFRSF1B,RS1,GRB2,NME1-NME2,YWHA…
Female	Process	GO:0007166		cell surface receptor signaling pathway	55	2198	0.45	2.68e-09	RELT,TNFRSF1A,SPG21,MADCAM1,IL2RB,TAX1BP3,PRTN3,PKD2,KLRK1,EFNB2,LIF,BCL2L2,CSNK1G2,KRAS,EDAR,PLXNC1,MSTN,FCER2,IL17RB,FRZB,PRKCB,PRKACA,CASP3,TOLLIP,CEP57,IGLL1,SNCA,PTPN11,CRKL,XCL1,FLNA,TNFRSF6B,GOT1,HSP90AB1,MMP9,MPL,LCN2,ROR2,C6orf25,TNFRSF1B,GRB2,NME1-NME2,YWHAZ,IL18BP,LRRTM4,OAS1,DIABLO,PRKCA,EFNA4,EIF2B1,LYN,AKT1,IL12RB1,NCAM1,BTK
Female	Process	GO:0022411		cellular component disassembly	12	364	0.57	0.0033	GABARAPL2,TLL1,MRPL32,TSG101,VPS4A,PRKCB,PLG,CASP3,MMP9,CHMP3,CNEP1R1,PRKCA
Female	Process	GO:0044267		cellular protein metabolic process	56	3603	0.24	0.0005	PSMD5,IL2RB,MRPL32,SEC61B,EFNB2,NR1D1,LIF,TSG101,VPS4A,CSNK1G2,KRAS,FOLH1,HTRA2,AARS,EIF3J,P4HA1,MUL1,SDHAF2,PAIP1,PRKCB,PPIH,PLG,PSMD1,PRKACA,TOLLIP,PAPPA,NPLOC4,SNCA,PTPN11,DCAF5,PTP4A2,CRKL,MSRB3,RAD23B,CDC42BPA,SMYD2,UBE2T,UFC1,FBXL4,UBL4A,PPIL1,ROR2,CARS,BRPF1,GOLM1,GRB2,NME1-NME2,VIMP,PRKCA,EFNA4,EIF2B1,LYN,AKT1,ANAPC10,NCAM1,BTK
Female	Process	GO:0071214		cellular response to abiotic stimulus	10	282	0.6	0.0056	TNFRSF1A,PKD2,GJA1,AKR1B1,CASP3,PTPN11,GOT1,RS1,GRB2,AKT1
Female	Process	GO:0071216		cellular response to biotic stimulus	9	176	0.76	0.0013	KLRK1,NR1D1,TNFRSF1B,VIMP,GSTP1,LYN,AKT1,MRC1,BTK
Female	Process	GO:0070887		cellular response to chemical stimulus	51	2672	0.33	1.05e-05	RELT,TNFRSF1A,IL2RB,GNPNAT1,MPO,PRTN3,PKD2,KLRK1,NR1D1,LIF,KRAS,HTRA2,EDAR,MSTN,FCER2,MUL1,GJA1,CA2,AKR1B1,IL17RB,PRKACA,CASP3,TOLLIP,CEP57,SNCA,PTPN11,CRKL,XCL1,TNFRSF6B,GOT1,HSP90AB1,MMP9,MPL,LCN2,ROR2,TNFRSF1B,GRB2,YWHAZ,VIMP,GSTP1,IL18BP,LRRTM4,OAS1,LYN,PGRMC2,GSTK1,AKT1,MRC1,IL12RB1,NCAM1,BTK
Female	Process	GO:0071345		cellular response to cytokine stimulus	33	953	0.59	1.59e-08	RELT,TNFRSF1A,IL2RB,GNPNAT1,PRTN3,LIF,KRAS,HTRA2,EDAR,FCER2,IL17RB,PRKACA,CASP3,TOLLIP,PTPN11,CRKL,XCL1,TNFRSF6B,HSP90AB1,MMP9,MPL,LCN2,TNFRSF1B,GRB2,YWHAZ,IL18BP,LRRTM4,OAS1,AKT1,MRC1,IL12RB1,NCAM1,BTK
Female	Process	GO:0071363		cellular response to growth factor stimulus	13	477	0.49	0.0076	HTRA2,MSTN,CASP3,CEP57,SNCA,PTPN11,CRKL,XCL1,ROR2,TNFRSF1B,GRB2,GSTP1,AKT1
Female	Process	GO:0071222		cellular response to lipopolysaccharide	8	146	0.79	0.002	KLRK1,NR1D1,TNFRSF1B,VIMP,GSTP1,LYN,AKT1,MRC1
Female	Process	GO:0071310		cellular response to organic substance	49	2219	0.39	5.92e-07	RELT,TNFRSF1A,IL2RB,GNPNAT1,PRTN3,PKD2,KLRK1,NR1D1,LIF,KRAS,HTRA2,EDAR,MSTN,FCER2,MUL1,GJA1,CA2,AKR1B1,IL17RB,PRKACA,CASP3,TOLLIP,CEP57,SNCA,PTPN11,CRKL,XCL1,TNFRSF6B,GOT1,HSP90AB1,MMP9,MPL,LCN2,ROR2,TNFRSF1B,GRB2,YWHAZ,VIMP,GSTP1,IL18BP,LRRTM4,OAS1,LYN,PGRMC2,AKT1,MRC1,IL12RB1,NCAM1,BTK
Female	Process	GO:0034599		cellular response to oxidative stress	9	222	0.66	0.0047	MPO,PKD2,HTRA2,SNCA,MMP9,VIMP,IL18BP,AKT1,BTK
Female	Process	GO:1901701		cellular response to oxygen-containing compound	21	896	0.42	0.0019	MPO,PKD2,KLRK1,NR1D1,HTRA2,MSTN,CA2,AKR1B1,PRKACA,SNCA,GOT1,MMP9,TNFRSF1B,GRB2,VIMP,GSTP1,IL18BP,LYN,AKT1,MRC1,BTK
Female	Process	GO:0051716		cellular response to stimulus	88	6212	0.2	2.39e-05	GABARAPL2,RELT,TNFRSF1A,PRLH,SPG21,MADCAM1,IL2RB,GNPNAT1,SEC61B,MPO,TAX1BP3,PRTN3,PKD2,KLRK1,TREM1,EFNB2,NR1D1,LIF,BCL2L2,CSNK1G2,KRAS,HTRA2,EDAR,PLXNC1,MSTN,FCER2,MUL1,TENM4,GJA1,CA2,AKR1B1,IL17RB,FRZB,RAC3,PRKCB,PRKACA,CASP3,TOLLIP,CEP57,SIGLEC7,IGLL1,CD300C,NPLOC4,SNCA,PTPN11,CRKL,RAD23B,SCAMP5,CDC42BPA,UBE2T,RGS18,XCL1,UFC1,FLNA,KIAA1324,TNFRSF6B,GOT1,OCRL,HSP90AB1,MMP9,MPL,LCN2,TMEM57,IGBP1,…
Female	Process	GO:0033554		cellular response to stress	31	1553	0.35	0.00076	GABARAPL2,TNFRSF1A,SEC61B,MPO,PKD2,BCL2L2,HTRA2,MUL1,CA2,AKR1B1,PRKACA,CASP3,NPLOC4,SNCA,PTPN11,CRKL,RAD23B,SCAMP5,UBE2T,UFC1,KIAA1324,MMP9,MPL,ROR2,TNFRSF1B,GRB2,VIMP,IL18BP,LYN,AKT1,BTK
Female	Process	GO:0071356		cellular response to tumor necrosis factor	8	197	0.66	0.0083	RELT,TNFRSF1A,EDAR,XCL1,TNFRSF6B,TNFRSF1B,IL18BP,AKT1
Female	Process	GO:0019221		cytokine-mediated signaling pathway	28	655	0.68	1.03e-08	RELT,TNFRSF1A,IL2RB,PRTN3,LIF,KRAS,EDAR,FCER2,IL17RB,PRKACA,CASP3,TOLLIP,PTPN11,CRKL,XCL1,TNFRSF6B,MMP9,MPL,LCN2,TNFRSF1B,GRB2,YWHAZ,IL18BP,LRRTM4,OAS1,AKT1,IL12RB1,NCAM1
Female	Process	GO:0010256		endomembrane system organization	11	337	0.56	0.0056	TSG101,VPS4A,PRKCB,NPLOC4,UBL4A,YWHAZ,CHMP3,CNEP1R1,PRKCA,TOR1AIP1,AKT1
Female	Process	GO:0006887		exocytosis	22	774	0.5	0.00014	RETN,MPO,PRTN3,SELL,TSG101,CRISPLD2,FABP5,PLG,OLR1,PSMD1,TOLLIP,SIGLEC14,SCAMP5,FLNA,HSP90AB1,MMP9,LCN2,TNFRSF1B,NME1-NME2,GSTP1,LYN,BTK
Female	Process	GO:0035408		histone H3-T6 phosphorylation	2	2	2.05	0.0081	PRKCB,PRKCA
Female	Process	GO:0042592		homeostatic process	31	1491	0.37	0.00046	PRLH,PKD2,NR1D1,KRAS,HNF1A,MRAP2,MSTN,GJA1,CA2,AKR1B1,FABP5,RAC3,PRKACA,CASP3,SNCA,PTPN11,KEL,XCL1,GOT1,HSP90AB1,MPL,LCN2,C6orf25,VIMP,GSTP1,OAS1,VSIG1,LYN,AKT1,TPT1,C19orf80
Female	Process	GO:0035556		intracellular signal transduction	27	1528	0.3	0.0088	TNFRSF1A,IL2RB,TAX1BP3,PKD2,TREM1,LIF,BCL2L2,KRAS,HTRA2,MUL1,AKR1B1,RAC3,PRKCB,PRKACA,CASP3,TOLLIP,CRKL,CDC42BPA,ROR2,TNFRSF1B,GRB2,DIABLO,PRKCA,LYN,AKT1,NCAM1,BTK
Female	Process	GO:1901564		organonitrogen compound metabolic process	77	5281	0.21	6.87e-05	TLL1,HSD17B10,PSMD5,IL2RB,MRPL32,SEC61B,PRTN3,EFNB2,NR1D1,LIF,TSG101,VPS4A,CSNK1G2,KRAS,FOLH1,HTRA2,AARS,EIF3J,P4HA1,MUL1,TENM4,AKR1B1,FABP5,SDHAF2,PAIP1,PRKCB,PPIH,PLG,OLR1,PSMD1,PRKACA,CASP3,TOLLIP,CERS5,IGLL1,PAPPA,NPLOC4,SNCA,PTPN11,DCAF5,PTP4A2,CRKL,MSRB3,KEL,RAD23B,CDC42BPA,SMYD2,UBE2T,UFC1,CUZD1,FBXL4,UBL4A,GOT1,MMP9,WFDC2,PPIL1,ROR2,CARS,BRPF1,GOLM1,GRB2,NME1-NME2,PC,VIMP,GSTP1,GGT2,OAS1,…
Female	Process	GO:0018193		peptidyl-amino acid modification	20	842	0.43	0.0022	EFNB2,LIF,CSNK1G2,FOLH1,P4HA1,MUL1,PRKCB,PPIH,PRKACA,SMYD2,PPIL1,ROR2,BRPF1,GRB2,NME1-NME2,PRKCA,EFNA4,LYN,AKT1,BTK
Female	Process	GO:0019538		protein metabolic process	67	4194	0.25	2.72e-05	TLL1,PSMD5,IL2RB,MRPL32,SEC61B,PRTN3,EFNB2,NR1D1,LIF,TSG101,VPS4A,CSNK1G2,KRAS,FOLH1,HTRA2,AARS,EIF3J,P4HA1,MUL1,TENM4,SDHAF2,PAIP1,PRKCB,PPIH,PLG,OLR1,PSMD1,PRKACA,CASP3,TOLLIP,IGLL1,PAPPA,NPLOC4,SNCA,PTPN11,DCAF5,PTP4A2,CRKL,MSRB3,KEL,RAD23B,CDC42BPA,SMYD2,UBE2T,UFC1,CUZD1,FBXL4,UBL4A,MMP9,WFDC2,PPIL1,ROR2,CARS,BRPF1,GOLM1,GRB2,NME1-NME2,VIMP,PRKCA,EFNA4,EIF2B1,XPNPEP1,LYN,AKT1,ANAPC10,NCAM1,BTK
Female	Process	GO:0006508		proteolysis	26	1203	0.39	0.00099	TLL1,PSMD5,SEC61B,PRTN3,NR1D1,TSG101,VPS4A,FOLH1,HTRA2,TENM4,PLG,OLR1,PSMD1,CASP3,TOLLIP,PAPPA,NPLOC4,KEL,RAD23B,CUZD1,FBXL4,MMP9,WFDC2,VIMP,XPNPEP1,ANAPC10
Female	Process	GO:0045055		regulated exocytosis	20	691	0.51	0.00027	RETN,MPO,PRTN3,SELL,CRISPLD2,FABP5,PLG,OLR1,PSMD1,TOLLIP,SIGLEC14,FLNA,HSP90AB1,MMP9,LCN2,TNFRSF1B,NME1-NME2,GSTP1,LYN,BTK
Female	Process	GO:0106071	(+)	regulation of adenylate cyclase-activating G protein-coupled receptor signaling pathway	3	5	1.83	0.0012	MRAP2,MRAP,PRKCA
Female	Process	GO:0009894		regulation of catabolic process	19	840	0.41	0.0047	GABARAPL2,HTRA2,MUL1,GJA1,PAIP1,PSMD1,PRKACA,CASP3,SNCA,RAD23B,UBQLN4,FLNA,KIAA1324,HSP90AB1,TNFRSF1B,YWHAZ,PRKCA,AKT1,CIRBP
Female	Process	GO:0043085	(+)	regulation of catalytic activity	25	1381	0.31	0.0097	GABARAPL2,TAX1BP3,PRTN3,PKD2,KRAS,HTRA2,FCER2,MUL1,PRKACA,CASP3,SNCA,PTPN11,CRKL,RGS18,XCL1,SMAP1,OCRL,HSP90AB1,ROR2,DIABLO,LYN,ARFGAP2,TOR1AIP1,AKT1,ANAPC10
Female	Process	GO:0050790		regulation of catalytic activity	42	2249	0.32	0.00017	GABARAPL2,TAX1BP3,PRTN3,PKD2,KLRK1,TSG101,KRAS,HTRA2,PLXNC1,MSTN,FCER2,MUL1,PSMD1,PRKACA,CASP3,SNCA,PTPN11,SERPINA6,CRKL,RGS18,XCL1,TNFRSF6B,SMAP1,OCRL,HSP90AB1,MMP9,WFDC2,IGBP1,ROR2,TNFRSF1B,SPOCK1,GSTP1,LRRTM4,OAS1,DIABLO,CST7,LYN,ARFGAP2,TOR1AIP1,AKT1,ANAPC10,C19orf80
Female	Process	GO:0050865		regulation of cell activation	15	506	0.52	0.0019	KLRK1,SNX4,MZB1,CASP3,IGLL1,SNCA,PTPN11,XCL1,MPL,GRB2,PRKCA,LYN,AKT1,IL12RB1,BTK
Female	Process	GO:0030155		regulation of cell adhesion	15	623	0.43	0.009	KLRK1,PLXNC1,RAC3,PLG,CASP3,PTPN11,CRKL,XCL1,FLNA,GRB2,SPOCK1,PRKCA,LYN,AKT1,IL12RB1
Female	Process	GO:0010646		regulation of cell communication	58	3327	0.29	1.8e-05	TNFRSF1A,PRLH,RETN,TAX1BP3,PKD2,NR1D1,CYTH4,LIF,BCL2L2,SNX4,TSG101,KRAS,MRAP2,HTRA2,EDAR,MSTN,MUL1,GJA1,CA2,AKR1B1,FRZB,FABP5,SDHAF2,RAC3,PRKCB,PRKACA,NPLOC4,SNCA,PTPN11,CRKL,SMYD2,RGS18,GORAB,XCL1,FLNA,GOT1,OCRL,HSP90AB1,MMP9,IGBP1,ROR2,C6orf25,RS1,BRPF1,GRB2,YWHAZ,VIMP,GSTP1,MRAP,IL18BP,LRRTM4,CYTH2,PRKCA,LYN,AKT1,TPT1,C19orf80,NCAM1
Female	Process	GO:0010647	(+)	regulation of cell communication	32	1631	0.34	0.00076	TNFRSF1A,RETN,PKD2,LIF,SNX4,KRAS,MRAP2,HTRA2,EDAR,MSTN,MUL1,GJA1,CA2,AKR1B1,FABP5,PRKCB,SNCA,PTPN11,CRKL,GORAB,XCL1,FLNA,GOT1,HSP90AB1,MMP9,ROR2,GRB2,YWHAZ,MRAP,PRKCA,LYN,AKT1
Female	Process	GO:0010648	(-)	regulation of cell communication	31	1255	0.44	2.73e-05	TAX1BP3,PKD2,NR1D1,LIF,BCL2L2,TSG101,MRAP2,HTRA2,MSTN,MUL1,FRZB,SDHAF2,PRKCB,PRKACA,NPLOC4,SNCA,PTPN11,RGS18,MMP9,IGBP1,ROR2,C6orf25,GRB2,VIMP,GSTP1,MRAP,IL18BP,LRRTM4,LYN,AKT1,TPT1
Female	Process	GO:0060341		regulation of cellular localization	18	766	0.42	0.0045	TAX1BP3,PKD2,NR1D1,LIF,SNX4,TSG101,VPS4A,MRAP2,PRKACA,SNCA,PTPN11,XCL1,HSP90AB1,YWHAZ,MRAP,CHMP3,LYN,AKT1
Female	Process	GO:0048523	(-)	regulation of cellular process	73	4454	0.27	3.91e-06	GABARAPL2,TNFRSF1A,IL2RB,ORC6,MPO,TAX1BP3,PRTN3,PKD2,RARRES1,KLRK1,BATF3,PIWIL1,EFNB2,NR1D1,LIF,BCL2L2,TSG101,VPS4A,KRAS,MRAP2,HTRA2,PLXNC1,MSTN,AARS,MUL1,GJA1,AKR1B1,FRZB,SDHAF2,PAIP1,MZB1,PRKCB,PLG,PRKACA,CASP3,NPLOC4,SNCA,PTPN11,SERPINA6,CRKL,KEL,KIRREL2,SCAMP5,SMYD2,FAIM3,RGS18,XCL1,UBQLN4,FLNA,TNFRSF6B,HSP90AB1,MMP9,WFDC2,IGBP1,ROR2,C6orf25,TNFRSF1B,GRB2,NME1-NME2,SPOCK1,YWHAZ,VIMP,GSTP1,MRA…
Female	Process	GO:0032268		regulation of cellular protein metabolic process	44	2486	0.3	0.00031	GABARAPL2,TNFRSF1A,PKD2,PIWIL1,LIF,TSG101,KRAS,HTRA2,EDAR,MSTN,AARS,MUL1,PAIP1,PRKACA,CASP3,TOLLIP,SNCA,PTPN11,SERPINA6,CRKL,RAD23B,KIRREL2,XCL1,UBQLN4,TNFRSF6B,HSP90AB1,MMP9,WFDC2,IGBP1,ROR2,TNFRSF1B,GRB2,SPOCK1,GSTP1,LRRTM4,DIABLO,CNEP1R1,PRKCA,CST7,LYN,AKT1,CIRBP,ANAPC10,C19orf80
Female	Process	GO:0032270	(+)	regulation of cellular protein metabolic process	28	1496	0.32	0.0039	TNFRSF1A,PKD2,LIF,KRAS,HTRA2,EDAR,MSTN,MUL1,PAIP1,PRKACA,CASP3,TOLLIP,SNCA,PTPN11,CRKL,XCL1,HSP90AB1,MMP9,ROR2,TNFRSF1B,DIABLO,CNEP1R1,PRKCA,LYN,AKT1,CIRBP,ANAPC10,C19orf80
Female	Process	GO:0032269	(-)	regulation of cellular protein metabolic process	21	1014	0.37	0.0062	GABARAPL2,LIF,TSG101,CASP3,SNCA,SERPINA6,CRKL,KIRREL2,TNFRSF6B,HSP90AB1,MMP9,WFDC2,IGBP1,TNFRSF1B,SPOCK1,GSTP1,LRRTM4,CST7,LYN,AKT1,CIRBP
Female	Process	GO:2000116		regulation of cysteine-type endopeptidase activity	11	243	0.71	0.00066	HTRA2,MUL1,CASP3,SNCA,TNFRSF6B,MMP9,IGBP1,TNFRSF1B,DIABLO,CST7,AKT1
Female	Process	GO:2000117	(-)	regulation of cysteine-type endopeptidase activity	7	110	0.85	0.0023	SNCA,TNFRSF6B,MMP9,IGBP1,TNFRSF1B,CST7,AKT1
Female	Process	GO:0052548		regulation of endopeptidase activity	15	393	0.63	0.00021	HTRA2,MUL1,CASP3,SNCA,SERPINA6,TNFRSF6B,MMP9,WFDC2,IGBP1,TNFRSF1B,SPOCK1,DIABLO,CST7,LYN,AKT1
Female	Process	GO:0010951	(-)	regulation of endopeptidase activity	10	242	0.67	0.0023	SNCA,SERPINA6,TNFRSF6B,MMP9,WFDC2,IGBP1,TNFRSF1B,SPOCK1,CST7,AKT1
Female	Process	GO:0010827		regulation of glucose transmembrane transport	6	84	0.9	0.0036	FABP5,MZB1,PRKCB,PTPN11,VIMP,AKT1
Female	Process	GO:0010829	(-)	regulation of glucose transmembrane transport	4	19	1.37	0.0014	FABP5,MZB1,PRKCB,VIMP
Female	Process	GO:0051345	(+)	regulation of hydrolase activity	17	742	0.41	0.0074	GABARAPL2,TAX1BP3,PRTN3,HTRA2,MUL1,CASP3,SNCA,RGS18,XCL1,SMAP1,OCRL,HSP90AB1,DIABLO,LYN,ARFGAP2,TOR1AIP1,AKT1
Female	Process	GO:0051336		regulation of hydrolase activity	29	1238	0.42	0.00014	GABARAPL2,TAX1BP3,PRTN3,KLRK1,HTRA2,PLXNC1,MUL1,CASP3,SNCA,SERPINA6,RGS18,XCL1,TNFRSF6B,SMAP1,OCRL,HSP90AB1,MMP9,WFDC2,IGBP1,TNFRSF1B,SPOCK1,OAS1,DIABLO,CST7,LYN,ARFGAP2,TOR1AIP1,AKT1,C19orf80
Female	Process	GO:1902531		regulation of intracellular signal transduction	37	1764	0.37	6.87e-05	TNFRSF1A,PKD2,CYTH4,LIF,BCL2L2,TSG101,KRAS,MRAP2,HTRA2,EDAR,MSTN,MUL1,AKR1B1,RAC3,PRKCB,PRKACA,NPLOC4,PTPN11,CRKL,SMYD2,XCL1,OCRL,HSP90AB1,MMP9,IGBP1,ROR2,BRPF1,GRB2,VIMP,GSTP1,MRAP,LRRTM4,CYTH2,PRKCA,LYN,AKT1,TPT1
Female	Process	GO:1902532	(-)	regulation of intracellular signal transduction	17	514	0.57	0.00027	PKD2,LIF,BCL2L2,MRAP2,HTRA2,MSTN,MUL1,NPLOC4,MMP9,IGBP1,VIMP,GSTP1,MRAP,LRRTM4,LYN,AKT1,TPT1
Female	Process	GO:0032879		regulation of localization	44	2524	0.29	0.00042	TNFRSF1A,MADCAM1,RETN,TAX1BP3,PRTN3,PKD2,KLRK1,NR1D1,LIF,SNX4,TSG101,VPS4A,MRAP2,MUL1,GJA1,CA2,IL17RB,FABP5,LMAN2,MZB1,PRKCB,PLG,PRKACA,SNCA,PTPN11,CRKL,KEL,SCAMP5,XCL1,FLNA,SMAP1,HSP90AB1,MMP9,IGBP1,ROR2,TNFRSF1B,YWHAZ,VIMP,GSTP1,MRAP,CHMP3,PRKCA,LYN,AKT1
Female	Process	GO:0065009		regulation of molecular function	57	3322	0.29	3.15e-05	GABARAPL2,PRLH,IL2RB,RETN,SEC61B,TAX1BP3,PRTN3,PKD2,KLRK1,CYTH4,LIF,TSG101,KRAS,MRAP2,HTRA2,PLXNC1,MSTN,FCER2,MUL1,GJA1,PRKCB,PSMD1,PRKACA,CASP3,SNCA,PTPN11,SERPINA6,CRKL,RGS18,XCL1,FLNA,TNFRSF6B,SMAP1,OCRL,HSP90AB1,MMP9,WFDC2,IGBP1,ROR2,TNFRSF1B,GRB2,SPOCK1,GSTP1,IL18BP,LRRTM4,OAS1,DIABLO,CYTH2,CST7,LYN,ARFGAP2,TOR1AIP1,AKT1,ANAPC10,C19orf80,NCAM1,BTK
Female	Process	GO:0042176		regulation of protein catabolic process	11	368	0.53	0.0092	GABARAPL2,GJA1,PSMD1,PRKACA,SNCA,RAD23B,UBQLN4,FLNA,HSP90AB1,TNFRSF1B,AKT1
Female	Process	GO:0051246		regulation of protein metabolic process	47	2668	0.3	0.00018	GABARAPL2,TNFRSF1A,PKD2,PIWIL1,LIF,TSG101,KRAS,HTRA2,EDAR,MSTN,AARS,MUL1,GJA1,PAIP1,PSMD1,PRKACA,CASP3,TOLLIP,SNCA,PTPN11,SERPINA6,CRKL,RAD23B,KIRREL2,XCL1,UBQLN4,FLNA,TNFRSF6B,HSP90AB1,MMP9,WFDC2,IGBP1,ROR2,TNFRSF1B,GRB2,SPOCK1,GSTP1,LRRTM4,DIABLO,CNEP1R1,PRKCA,CST7,LYN,AKT1,CIRBP,ANAPC10,C19orf80
Female	Process	GO:0051247	(+)	regulation of protein metabolic process	29	1587	0.31	0.0042	TNFRSF1A,PKD2,LIF,KRAS,HTRA2,EDAR,MSTN,MUL1,GJA1,PAIP1,PRKACA,CASP3,TOLLIP,SNCA,PTPN11,CRKL,XCL1,HSP90AB1,MMP9,ROR2,TNFRSF1B,DIABLO,CNEP1R1,PRKCA,LYN,AKT1,CIRBP,ANAPC10,C19orf80
Female	Process	GO:0051248	(-)	regulation of protein metabolic process	22	1075	0.36	0.0055	GABARAPL2,LIF,TSG101,CASP3,SNCA,SERPINA6,CRKL,KIRREL2,FLNA,TNFRSF6B,HSP90AB1,MMP9,WFDC2,IGBP1,TNFRSF1B,SPOCK1,GSTP1,LRRTM4,CST7,LYN,AKT1,CIRBP
Female	Process	GO:0001932		regulation of protein phosphorylation	25	1370	0.31	0.009	TNFRSF1A,PKD2,LIF,TSG101,KRAS,EDAR,MSTN,MUL1,PRKACA,CASP3,SNCA,PTPN11,CRKL,KIRREL2,XCL1,HSP90AB1,MMP9,IGBP1,ROR2,GRB2,GSTP1,LRRTM4,PRKCA,LYN,AKT1
Female	Process	GO:0071900		regulation of protein serine/threonine kinase activity	13	488	0.48	0.0088	PKD2,TSG101,KRAS,MUL1,CASP3,SNCA,PTPN11,CRKL,HSP90AB1,ROR2,GSTP1,LYN,AKT1
Female	Process	GO:0030162		regulation of proteolysis	21	742	0.5	0.00023	GABARAPL2,HTRA2,MUL1,PRKACA,CASP3,SNCA,SERPINA6,RAD23B,UBQLN4,TNFRSF6B,HSP90AB1,MMP9,WFDC2,IGBP1,TNFRSF1B,SPOCK1,DIABLO,CST7,LYN,AKT1,C19orf80
Female	Process	GO:0045861	(-)	regulation of proteolysis	12	349	0.59	0.0025	GABARAPL2,SNCA,SERPINA6,TNFRSF6B,HSP90AB1,MMP9,WFDC2,IGBP1,TNFRSF1B,SPOCK1,CST7,AKT1
Female	Process	GO:2000377		regulation of reactive oxygen species metabolic process	8	169	0.73	0.0041	PKD2,KLRK1,SNCA,HSP90AB1,GRB2,VIMP,GSTP1,AKT1
Female	Process	GO:2000379	(+)	regulation of reactive oxygen species metabolic process	7	94	0.92	0.0011	PKD2,KLRK1,SNCA,HSP90AB1,GRB2,GSTP1,AKT1
Female	Process	GO:0002831		regulation of response to biotic stimulus	13	426	0.54	0.0036	KLRK1,NR1D1,KRAS,MUL1,PRKACA,NPLOC4,PTPN11,RAET1E,HSP90AB1,PRKCA,LYN,IL12RB1,BTK
Female	Process	GO:0032101		regulation of response to external stimulus	24	955	0.45	0.0003	TNFRSF1A,KLRK1,EFNB2,NR1D1,SNX4,KRAS,MUL1,GJA1,IL17RB,PLG,PRKACA,NPLOC4,SNCA,PTPN11,RAET1E,XCL1,HSP90AB1,TNFRSF1B,VIMP,GSTP1,PRKCA,LYN,IL12RB1,BTK
Female	Process	GO:0032103	(+)	regulation of response to external stimulus	13	499	0.47	0.0099	TNFRSF1A,KLRK1,SNX4,KRAS,IL17RB,PLG,PRKACA,SNCA,RAET1E,XCL1,PRKCA,LYN,BTK
Female	Process	GO:0048583		regulation of response to stimulus	76	3882	0.34	2.68e-09	TNFRSF1A,PRLH,SPG21,MADCAM1,RETN,TAX1BP3,ULBP1,SELL,PKD2,KLRK1,TREM1,EFNB2,NR1D1,CYTH4,LIF,BCL2L2,SNX4,TSG101,KRAS,MRAP2,HTRA2,EDAR,MSTN,FCER2,MUL1,GJA1,AKR1B1,IL17RB,FRZB,FABP5,SDHAF2,MZB1,RAC3,PRKCB,PLG,PRKACA,SIGLEC7,IGLL1,CD300C,NPLOC4,SNCA,PTPN11,CRKL,RAET1E,SMYD2,RGS18,GORAB,XCL1,FLNA,GOT1,OCRL,HSP90AB1,MMP9,IGBP1,ROR2,C6orf25,TNFRSF1B,RS1,BRPF1,GRB2,YWHAZ,VIMP,GSTP1,MRAP,IL18BP,LRRTM4,CYTH…
Female	Process	GO:0048584	(+)	regulation of response to stimulus	42	2054	0.36	2.6e-05	TNFRSF1A,SPG21,RETN,PKD2,KLRK1,LIF,SNX4,KRAS,MRAP2,HTRA2,EDAR,MSTN,FCER2,MUL1,GJA1,AKR1B1,IL17RB,FABP5,PRKCB,PLG,PRKACA,IGLL1,SNCA,PTPN11,CRKL,RAET1E,GORAB,XCL1,FLNA,GOT1,HSP90AB1,MMP9,ROR2,GRB2,YWHAZ,MRAP,PRKCA,EIF2B1,LYN,AKT1,IL12RB1,BTK
Female	Process	GO:0048585	(-)	regulation of response to stimulus	38	1483	0.46	1.08e-06	TNFRSF1A,TAX1BP3,PKD2,KLRK1,NR1D1,LIF,BCL2L2,TSG101,MRAP2,HTRA2,MSTN,MUL1,GJA1,FRZB,SDHAF2,MZB1,PRKCB,PLG,PRKACA,NPLOC4,SNCA,PTPN11,RGS18,XCL1,MMP9,IGBP1,ROR2,C6orf25,TNFRSF1B,GRB2,VIMP,GSTP1,MRAP,IL18BP,LRRTM4,LYN,AKT1,TPT1
Female	Process	GO:0080134		regulation of response to stress	30	1299	0.41	0.00012	TNFRSF1A,KLRK1,NR1D1,SNX4,KRAS,HTRA2,EDAR,MUL1,GJA1,IL17RB,PLG,PRKACA,NPLOC4,SNCA,PTPN11,RAET1E,SMYD2,XCL1,HSP90AB1,IGBP1,ROR2,TNFRSF1B,VIMP,GSTP1,PRKCA,LYN,AKT1,IL12RB1,TPT1,BTK
Female	Process	GO:0009966		regulation of signal transduction	55	3033	0.31	1.34e-05	TNFRSF1A,PRLH,RETN,TAX1BP3,PKD2,NR1D1,CYTH4,LIF,BCL2L2,TSG101,KRAS,MRAP2,HTRA2,EDAR,MSTN,MUL1,AKR1B1,FRZB,FABP5,SDHAF2,RAC3,PRKCB,PRKACA,NPLOC4,SNCA,PTPN11,CRKL,SMYD2,RGS18,GORAB,XCL1,FLNA,GOT1,OCRL,HSP90AB1,MMP9,IGBP1,ROR2,C6orf25,RS1,BRPF1,GRB2,YWHAZ,VIMP,GSTP1,MRAP,IL18BP,LRRTM4,CYTH2,PRKCA,LYN,AKT1,TPT1,C19orf80,NCAM1
Female	Process	GO:0009967	(+)	regulation of signal transduction	27	1493	0.31	0.007	TNFRSF1A,PKD2,LIF,KRAS,MRAP2,HTRA2,EDAR,MSTN,MUL1,AKR1B1,FABP5,PRKCB,PTPN11,CRKL,GORAB,XCL1,FLNA,GOT1,HSP90AB1,MMP9,ROR2,GRB2,YWHAZ,MRAP,PRKCA,LYN,AKT1
Female	Process	GO:0009968	(-)	regulation of signal transduction	30	1160	0.46	2e-05	TAX1BP3,PKD2,NR1D1,LIF,BCL2L2,TSG101,MRAP2,HTRA2,MSTN,MUL1,FRZB,SDHAF2,PRKCB,PRKACA,NPLOC4,SNCA,RGS18,MMP9,IGBP1,ROR2,C6orf25,GRB2,VIMP,GSTP1,MRAP,IL18BP,LRRTM4,LYN,AKT1,TPT1
Female	Process	GO:0023051		regulation of signaling	58	3360	0.29	2.32e-05	TNFRSF1A,PRLH,RETN,TAX1BP3,PKD2,NR1D1,CYTH4,LIF,BCL2L2,SNX4,TSG101,KRAS,MRAP2,HTRA2,EDAR,MSTN,MUL1,GJA1,CA2,AKR1B1,FRZB,FABP5,SDHAF2,RAC3,PRKCB,PRKACA,NPLOC4,SNCA,PTPN11,CRKL,SMYD2,RGS18,GORAB,XCL1,FLNA,GOT1,OCRL,HSP90AB1,MMP9,IGBP1,ROR2,C6orf25,RS1,BRPF1,GRB2,YWHAZ,VIMP,GSTP1,MRAP,IL18BP,LRRTM4,CYTH2,PRKCA,LYN,AKT1,TPT1,C19orf80,NCAM1
Female	Process	GO:0023056	(+)	regulation of signaling	32	1638	0.34	0.00082	TNFRSF1A,RETN,PKD2,LIF,SNX4,KRAS,MRAP2,HTRA2,EDAR,MSTN,MUL1,GJA1,CA2,AKR1B1,FABP5,PRKCB,SNCA,PTPN11,CRKL,GORAB,XCL1,FLNA,GOT1,HSP90AB1,MMP9,ROR2,GRB2,YWHAZ,MRAP,PRKCA,LYN,AKT1
Female	Process	GO:0023057	(-)	regulation of signaling	31	1258	0.44	2.8e-05	TAX1BP3,PKD2,NR1D1,LIF,BCL2L2,TSG101,MRAP2,HTRA2,MSTN,MUL1,FRZB,SDHAF2,PRKCB,PRKACA,NPLOC4,SNCA,PTPN11,RGS18,MMP9,IGBP1,ROR2,C6orf25,GRB2,VIMP,GSTP1,MRAP,IL18BP,LRRTM4,LYN,AKT1,TPT1
Female	Process	GO:0034762		regulation of transmembrane transport	16	524	0.54	0.00086	PKD2,GJA1,CA2,FABP5,MZB1,PRKCB,PRKACA,SNCA,PTPN11,KEL,XCL1,FLNA,MMP9,VIMP,LYN,AKT1
Female	Process	GO:0034763	(-)	regulation of transmembrane transport	8	116	0.89	0.0006	PKD2,FABP5,MZB1,PRKCB,KEL,MMP9,VIMP,AKT1
Female	Process	GO:0051049		regulation of transport	34	1732	0.34	0.00051	TNFRSF1A,RETN,PRTN3,PKD2,NR1D1,LIF,SNX4,TSG101,VPS4A,MUL1,GJA1,CA2,IL17RB,FABP5,LMAN2,MZB1,PRKCB,PRKACA,SNCA,PTPN11,KEL,SCAMP5,XCL1,FLNA,SMAP1,HSP90AB1,MMP9,TNFRSF1B,YWHAZ,VIMP,CHMP3,PRKCA,LYN,AKT1
Female	Process	GO:0051051	(-)	regulation of transport	15	450	0.57	0.00066	TNFRSF1A,PRTN3,PKD2,LIF,FABP5,MZB1,PRKCB,SNCA,PTPN11,KEL,SCAMP5,MMP9,TNFRSF1B,VIMP,AKT1
Female	Process	GO:0009628		response to abiotic stimulus	22	1052	0.37	0.0044	TNFRSF1A,RETN,MPO,PKD2,KRAS,HTRA2,MSTN,GJA1,CA2,AKR1B1,PRKACA,CASP3,PTPN11,GOT1,HSP90AB1,MPL,RS1,GRB2,EIF2B1,LYN,AKT1,CIRBP
Female	Process	GO:0009743		response to carbohydrate	9	164	0.79	0.00083	PRLH,GJA1,PRKACA,CASP3,GOT1,VIMP,GSTP1,EIF2B1,LYN
Female	Process	GO:0042221		response to chemical	63	4153	0.23	0.00027	RELT,TNFRSF1A,PRLH,HSD17B2,IL2RB,GNPNAT1,RETN,SEC61B,MPO,PRTN3,SELL,PKD2,KLRK1,EFNB2,NR1D1,LIF,KRAS,HTRA2,EDAR,MSTN,FCER2,MUL1,GJA1,CA2,AKR1B1,IL17RB,PRKACA,CASP3,TOLLIP,CEP57,PAPPA,NPLOC4,SNCA,PTPN11,CRKL,XCL1,TNFRSF6B,GOT1,HSP90AB1,MMP9,MPL,LCN2,IGBP1,ROR2,TNFRSF1B,GRB2,YWHAZ,VIMP,GSTP1,IL18BP,LRRTM4,OAS1,PRKCA,EFNA4,EIF2B1,LYN,PGRMC2,GSTK1,AKT1,MRC1,IL12RB1,NCAM1,BTK
Female	Process	GO:0034097		response to cytokine	36	1035	0.59	3.49e-09	RELT,TNFRSF1A,IL2RB,GNPNAT1,PRTN3,LIF,KRAS,HTRA2,EDAR,FCER2,IL17RB,PRKACA,CASP3,TOLLIP,SNCA,PTPN11,CRKL,XCL1,TNFRSF6B,HSP90AB1,MMP9,MPL,LCN2,IGBP1,TNFRSF1B,GRB2,YWHAZ,IL18BP,LRRTM4,OAS1,PRKCA,AKT1,MRC1,IL12RB1,NCAM1,BTK
Female	Process	GO:0009719		response to endogenous stimulus	26	1353	0.33	0.0043	PRLH,RETN,PKD2,NR1D1,KRAS,MSTN,GJA1,CA2,AKR1B1,PRKACA,CASP3,CEP57,PAPPA,SNCA,PTPN11,CRKL,XCL1,GOT1,ROR2,GRB2,VIMP,GSTP1,EIF2B1,LYN,PGRMC2,AKT1
Female	Process	GO:0009605		response to external stimulus	44	2152	0.36	1.48e-05	GABARAPL2,RELT,TNFRSF1A,PRLH,RETN,MPO,ULBP1,PRTN3,SELL,PKD2,KLRK1,BATF3,TREM1,EFNB2,NR1D1,GJA1,CASP3,TOLLIP,IGLL1,SNCA,PTPN11,RAET1E,SIGLEC14,XCL1,KIAA1324,TNFRSF6B,GOT1,LCN2,TNFRSF1B,RS1,GRB2,VIMP,GSTP1,IL18BP,OAS1,PRKCA,EFNA4,LYN,AKT1,MRC1,IL12RB1,TPT1,NCAM1,BTK
Female	Process	GO:0034405		response to fluid shear stress	4	35	1.11	0.007	PKD2,GJA1,CA2,AKT1
Female	Process	GO:0009408		response to heat	6	89	0.88	0.0044	HTRA2,MSTN,PRKACA,EIF2B1,LYN,AKT1
Female	Process	GO:0009725		response to hormone	20	854	0.42	0.0025	PRLH,RETN,NR1D1,KRAS,MSTN,GJA1,CA2,AKR1B1,PRKACA,CASP3,PAPPA,PTPN11,GOT1,GRB2,VIMP,GSTP1,EIF2B1,LYN,PGRMC2,AKT1
Female	Process	GO:0033993		response to lipid	24	825	0.51	4.08e-05	RELT,TNFRSF1A,HSD17B2,MPO,KLRK1,NR1D1,KRAS,HTRA2,MSTN,GJA1,CA2,CASP3,PAPPA,SNCA,TNFRSF6B,GOT1,TNFRSF1B,VIMP,GSTP1,IL18BP,LYN,PGRMC2,AKT1,MRC1
Female	Process	GO:0032496		response to lipopolysaccharide	16	298	0.78	3.91e-06	RELT,TNFRSF1A,MPO,KLRK1,NR1D1,GJA1,CASP3,SNCA,TNFRSF6B,TNFRSF1B,VIMP,GSTP1,IL18BP,LYN,AKT1,MRC1
Female	Process	GO:0034284		response to monosaccharide	7	143	0.74	0.007	PRLH,GJA1,PRKACA,CASP3,VIMP,GSTP1,EIF2B1
Female	Process	GO:1901698		response to nitrogen compound	21	988	0.38	0.0049	PRLH,RETN,SEC61B,SELL,PKD2,MUL1,GJA1,CA2,AKR1B1,PRKACA,CASP3,NPLOC4,SNCA,GOT1,HSP90AB1,GRB2,VIMP,GSTP1,EIF2B1,LYN,AKT1
Female	Process	GO:0010033		response to organic substance	60	2815	0.38	1.63e-08	RELT,TNFRSF1A,PRLH,HSD17B2,IL2RB,GNPNAT1,RETN,SEC61B,MPO,PRTN3,SELL,PKD2,KLRK1,NR1D1,LIF,KRAS,HTRA2,EDAR,MSTN,FCER2,MUL1,GJA1,CA2,AKR1B1,IL17RB,PRKACA,CASP3,TOLLIP,CEP57,PAPPA,NPLOC4,SNCA,PTPN11,CRKL,XCL1,TNFRSF6B,GOT1,HSP90AB1,MMP9,MPL,LCN2,IGBP1,ROR2,TNFRSF1B,GRB2,YWHAZ,VIMP,GSTP1,IL18BP,LRRTM4,OAS1,PRKCA,EIF2B1,LYN,PGRMC2,AKT1,MRC1,IL12RB1,NCAM1,BTK
Female	Process	GO:0010243		response to organonitrogen compound	20	876	0.41	0.0033	PRLH,RETN,SEC61B,SELL,PKD2,GJA1,CA2,AKR1B1,PRKACA,CASP3,NPLOC4,SNCA,GOT1,HSP90AB1,GRB2,VIMP,GSTP1,EIF2B1,LYN,AKT1
Female	Process	GO:0006979		response to oxidative stress	12	373	0.56	0.0039	MPO,PKD2,HTRA2,CASP3,SNCA,MSRB3,MMP9,VIMP,GSTP1,IL18BP,AKT1,BTK
Female	Process	GO:1901700		response to oxygen-containing compound	32	1427	0.4	9.92e-05	RELT,TNFRSF1A,PRLH,HSD17B2,RETN,MPO,SELL,PKD2,KLRK1,NR1D1,HTRA2,MSTN,GJA1,CA2,AKR1B1,PRKACA,CASP3,SNCA,TNFRSF6B,GOT1,HSP90AB1,MMP9,TNFRSF1B,GRB2,VIMP,GSTP1,IL18BP,EIF2B1,LYN,AKT1,MRC1,BTK
Female	Process	GO:1901652		response to peptide	13	431	0.53	0.0039	PRLH,RETN,GJA1,CA2,AKR1B1,PRKACA,GOT1,GRB2,VIMP,GSTP1,EIF2B1,LYN,AKT1
Female	Process	GO:0043434		response to peptide hormone	12	362	0.57	0.0032	PRLH,RETN,GJA1,CA2,PRKACA,GOT1,GRB2,VIMP,GSTP1,EIF2B1,LYN,AKT1
Female	Process	GO:0000302		response to reactive oxygen species	8	189	0.68	0.007	MPO,PKD2,CASP3,MMP9,GSTP1,IL18BP,AKT1,BTK
Female	Process	GO:0050896		response to stimulus	106	7824	0.18	4.22e-06	GABARAPL2,RELT,TNFRSF1A,PRLH,HSD17B2,SPG21,MADCAM1,IL2RB,GNPNAT1,RETN,SEC61B,MPO,TAX1BP3,ULBP1,PRTN3,SELL,PKD2,KLRK1,BATF3,TREM1,EFNB2,NR1D1,LIF,BCL2L2,CSNK1G2,KRAS,HTRA2,EDAR,PLXNC1,MSTN,CRISPLD2,FCER2,MUL1,TENM4,GJA1,CA2,AKR1B1,IL17RB,FRZB,FABP5,RAC3,PRKCB,PLG,OLR1,PSMD1,PRKACA,CASP3,TOLLIP,CEP57,SIGLEC7,IGLL1,CD300C,PAPPA,NPLOC4,SNCA,PTPN11,CRKL,MSRB3,RAET1E,RAD23B,SIGLEC14,SCAMP5,CDC42BPA,FAI…
Female	Process	GO:0006950		response to stress	66	3267	0.36	1.41e-08	GABARAPL2,RELT,TNFRSF1A,SEC61B,MPO,ULBP1,PRTN3,PKD2,KLRK1,TREM1,BCL2L2,KRAS,HTRA2,MSTN,MUL1,GJA1,CA2,AKR1B1,IL17RB,PRKCB,PLG,OLR1,PRKACA,CASP3,TOLLIP,IGLL1,CD300C,NPLOC4,SNCA,PTPN11,CRKL,MSRB3,RAET1E,RAD23B,SIGLEC14,SCAMP5,FAIM3,UBE2T,XCL1,UFC1,FLNA,KIAA1324,TNFRSF6B,GOT1,HSP90AB1,MMP9,MPL,LCN2,ROR2,C6orf25,TNFRSF1B,GRB2,YWHAZ,VIMP,GSTP1,IL18BP,OAS1,PRKCA,EIF2B1,LYN,AKT1,MRC1,CIRBP,IL12RB1,NCAM1,…
Female	Process	GO:0009266		response to temperature stimulus	7	155	0.71	0.0096	HTRA2,MSTN,PRKACA,EIF2B1,LYN,AKT1,CIRBP
Female	Process	GO:1990267		response to transition metal nanoparticle	2	2	2.05	0.0081	MPO,GOT1
Female	Process	GO:0034612		response to tumor necrosis factor	10	217	0.71	0.0011	RELT,TNFRSF1A,EDAR,CASP3,XCL1,TNFRSF6B,IGBP1,TNFRSF1B,IL18BP,AKT1
Female	Process	GO:0030970		retrograde protein transport, ER to cytosol	3	16	1.32	0.0096	SEC61B,NPLOC4,VIMP
Female	Process	GO:0046903		secretion	25	1070	0.42	0.00053	RETN,MPO,PRTN3,SELL,TSG101,HNF1A,CRISPLD2,GJA1,CA2,FABP5,PLG,OLR1,PSMD1,TOLLIP,SIGLEC14,SCAMP5,FLNA,HSP90AB1,MMP9,LCN2,TNFRSF1B,NME1-NME2,GSTP1,LYN,BTK
Female	Process	GO:0032940		secretion by cell	23	959	0.43	0.0007	RETN,MPO,PRTN3,SELL,TSG101,HNF1A,CRISPLD2,FABP5,PLG,OLR1,PSMD1,TOLLIP,SIGLEC14,SCAMP5,FLNA,HSP90AB1,MMP9,LCN2,TNFRSF1B,NME1-NME2,GSTP1,LYN,BTK
Female	Process	GO:0007165		signal transduction	76	4738	0.26	3.91e-06	RELT,TNFRSF1A,PRLH,SPG21,MADCAM1,IL2RB,TAX1BP3,PRTN3,PKD2,KLRK1,TREM1,EFNB2,NR1D1,LIF,BCL2L2,CSNK1G2,KRAS,HTRA2,EDAR,PLXNC1,MSTN,FCER2,MUL1,TENM4,GJA1,CA2,AKR1B1,IL17RB,FRZB,RAC3,PRKCB,PRKACA,CASP3,TOLLIP,CEP57,SIGLEC7,IGLL1,CD300C,SNCA,PTPN11,CRKL,CDC42BPA,RGS18,XCL1,FLNA,TNFRSF6B,GOT1,OCRL,HSP90AB1,MMP9,MPL,LCN2,TMEM57,IGBP1,ROR2,C6orf25,TNFRSF1B,RS1,GRB2,NME1-NME2,YWHAZ,VIMP,IL18BP,LRRTM4,OAS1…
Female	Process	GO:0023052		signaling	77	5108	0.23	2.32e-05	RELT,TNFRSF1A,PRLH,SPG21,MADCAM1,IL2RB,TAX1BP3,PRTN3,PKD2,KLRK1,TREM1,EFNB2,NR1D1,LIF,BCL2L2,CSNK1G2,KRAS,HNF1A,HTRA2,EDAR,PLXNC1,MSTN,FCER2,MUL1,TENM4,GJA1,CA2,AKR1B1,IL17RB,FRZB,RAC3,PRKCB,PRKACA,CASP3,TOLLIP,CEP57,SIGLEC7,IGLL1,CD300C,SNCA,PTPN11,CRKL,CDC42BPA,RGS18,XCL1,FLNA,TNFRSF6B,GOT1,OCRL,HSP90AB1,MMP9,MPL,LCN2,TMEM57,IGBP1,ROR2,C6orf25,TNFRSF1B,RS1,GRB2,NME1-NME2,YWHAZ,VIMP,IL18BP,LRRTM…
Female	Process	GO:0016192		vesicle-mediated transport	34	1699	0.35	0.00037	GABARAPL2,RETN,MPO,PRTN3,SELL,SNX4,TSG101,VPS4A,CSNK1G2,CRISPLD2,FABP5,LMAN2,PLG,OLR1,PSMD1,TOLLIP,IGLL1,SNCA,SIGLEC14,SCAMP5,FLNA,HSP90AB1,MMP9,LCN2,TNFRSF1B,GRB2,NME1-NME2,GSTP1,CHMP3,CYTH2,LYN,ARFGAP2,MRC1,BTK
Female	Process	GO:0006915		apoptotic process	19	915	0.37	0.0096	RELT,TNFRSF1A,BCL2L2,HTRA2,EDAR,MUL1,GJA1,MZB1,PRKCB,CASP3,SNCA,TNFRSF6B,LCN2,TNFRSF1B,DIABLO,CHMP3,PRKCA,AKT1,BTK
Female	Process	GO:0097190		apoptotic signaling pathway	10	295	0.58	0.0072	RELT,TNFRSF1A,BCL2L2,HTRA2,CASP3,TNFRSF6B,TNFRSF1B,DIABLO,PRKCA,BTK
Female	Process	GO:0007077		mitotic nuclear envelope disassembly	3	12	1.45	0.0056	PRKCB,CNEP1R1,PRKCA
Female	Process	GO:0006998		nuclear envelope organization	5	52	1.03	0.0036	VPS4A,PRKCB,CNEP1R1,PRKCA,TOR1AIP1
Female	Process	GO:0006997		nucleus organization	7	124	0.8	0.0039	PIWIL1,VPS4A,PRKCB,GOLM1,CNEP1R1,PRKCA,TOR1AIP1
Female	Process	GO:0042981		regulation of apoptotic process	31	1501	0.37	0.00051	RELT,TNFRSF1A,IL2RB,MPO,BCL2L2,KRAS,HTRA2,MSTN,AARS,MUL1,AKR1B1,FRZB,CASP3,SNCA,FAIM3,FLNA,TNFRSF6B,HSP90AB1,MMP9,IGBP1,TNFRSF1B,NME1-NME2,YWHAZ,VIMP,GSTP1,DIABLO,PRKCA,LYN,AKT1,TPT1,BTK
Female	Process	GO:0043066	(-)	regulation of apoptotic process	23	859	0.48	0.0002	IL2RB,MPO,BCL2L2,KRAS,HTRA2,AARS,AKR1B1,CASP3,SNCA,FAIM3,FLNA,TNFRSF6B,HSP90AB1,MMP9,IGBP1,TNFRSF1B,NME1-NME2,YWHAZ,VIMP,GSTP1,PRKCA,AKT1,TPT1
Female	Process	GO:0010941		regulation of cell death	32	1638	0.34	0.00082	RELT,TNFRSF1A,IL2RB,MPO,EFNB2,BCL2L2,KRAS,HTRA2,MSTN,AARS,MUL1,AKR1B1,FRZB,CASP3,SNCA,FAIM3,FLNA,TNFRSF6B,HSP90AB1,MMP9,IGBP1,TNFRSF1B,NME1-NME2,YWHAZ,VIMP,GSTP1,DIABLO,PRKCA,LYN,AKT1,TPT1,BTK
Female	Process	GO:0031341		regulation of cell killing	6	73	0.97	0.0021	KLRK1,FCER2,RAET1E,XCL1,HSP90AB1,IL12RB1
Female	Process	GO:0031343	(+)	regulation of cell killing	5	47	1.08	0.0025	KLRK1,FCER2,RAET1E,XCL1,IL12RB1
Female	Process	GO:0043281		regulation of cysteine-type endopeptidase activity involved in apoptotic process	10	209	0.73	0.00089	HTRA2,MUL1,CASP3,SNCA,TNFRSF6B,MMP9,IGBP1,TNFRSF1B,DIABLO,AKT1
Female	Process	GO:0043154	(-)	regulation of cysteine-type endopeptidase activity involved in apoptotic process	6	91	0.87	0.0047	SNCA,TNFRSF6B,MMP9,IGBP1,TNFRSF1B,AKT1
Female	Process	GO:2001243	(-)	regulation of intrinsic apoptotic signaling pathway	6	96	0.85	0.0057	BCL2L2,HTRA2,MMP9,VIMP,AKT1,TPT1
Female	RCTM (reactome)	HSA-1280215		Cytokine Signaling in Immune system	13	328	0.65	0.00041	TNFRSF1A,IL2RB,LIF,EDAR,FCER2,IL17RB,TOLLIP,CRKL,LCN2,TNFRSF1B,GRB2,IL18BP,IL12RB1
OGC: Observed gene count; BGC: Background gene count

## Sheet: Table_S5
Table S5. Replication of results from Mersha et al. [1]
				Mersha et al.					Espuela-Ortiz et al.
RSID_Mersha	chr:pos	A1/A2	Gene	P_comb	P_int	P_fem	P_male		p interaction	p female	p male
rs6588169	1:66335318	C/T	PDE4B	0.99	0.038	0.15	0.12		0.225	0.329	0.681
rs7525758	1:66494755	G/A	PDE4B	0.3	0.06	0.038	0.52		0.779	0.399	0.501
rs680925	1:66583121	A/G	PDE4B	0.55	0.018	0.18	0.038		0.235	0.392	0.782
rs17421942	1:66588029	T/C	PDE4B	0.21	0.034	0.52	0.028		0.878	0.93	0.655
rs11102221	1:111784816	A/G	CHI3L2	0.12	0.28	0.91	0.035		0.427	0.0374	0.256
rs1057258	2:234115629	T/C	SHIP1	0.27	0.11	0.044	0.68		0.16	0.277	0.542
rs4701999	5:13905405	C/T	DNAH5	0.08	0.27	0.045	0.73		0.479	0.387	0.744
rs3806933	5:110406742	T/C	TSLP	0.53	0.043	0.06	0.35		0.16	0.89	0.0368
rs2289277	5:110409067	G/C	TSLP	0.33	0.041	0.037	0.48		0.105	0.943	0.0149
rs2243250	5:132009154	T/C	IL4	0.00016	0.58	0.0026	0.02		0.0214	0.682	0.023
rs2243268	5:132013963	C/A	IL4	0.00053	0.84	0.012	0.016		0.296	0.868	0.259
rs2243282	5:132016554	A/C	IL4	0.00081	0.94	0.019	0.018		0.13	0.99	0.113
rs12186803	5:132040069	A/G	KIF3A	0.0013	0.99	0.023	0.023		0.473	0.728	0.448
rs3798130	5:132042146	T/C	KIF3A	0.0011	0.83	0.015	0.029		0.121	0.951	0.0918
rs2299011	5:132042542	G/C	KIF3A	0.00062	0.9	0.021	0.012		0.121	0.951	0.0918
rs12514685	5:132045712	T/C	KIF3A	0.0011	0.92	0.03	0.015		0.121	0.942	0.0891
rs7737031	5:132046590	T/C	KIF3A	0.00057	0.94	0.015	0.014		0.477	0.695	0.424
rs1080001	5:132049116	C/T	KIF3A	0.0011	0.91	0.027	0.016		0.485	0.694	0.433
rs9784675	5:132069739	G/A	KIF3A	0.0016	0.55	0.01	0.06		0.167	0.937	0.131
rs2069884	5:135228388	T/G	IL9	0.017	0.57	0.22	0.04		0.835	0.691	0.908
rs3822744	5:147442419	G/A	SPINK5	0.45	0.02	0.27	0.024		0.59	0.574	0.803
rs1423007	5:147442868	T/C	SPINK5	0.32	0.022	0.35	0.016		0.471	0.411	0.905
rs7445392	5:147451451	T/C	SPINK5	0.01	0.35	0.27	0.01		0.152	0.853	0.019
rs6892205	5:147475386	G/A	SPINK5	0.048	0.3	0.52	0.032		0.397	0.0794	0.0367
rs2303063	5:147480027	A/G	SPINK5	0.014	0.49	0.23	0.023		0.266	0.524	0.105
rs2303064	5:147480080	A/G	SPINK5	0.003	0.09	0.001	0.42		0.187	0.475	0.333
rs9325071	5:147497338	G/A	SPINK5	0.009	0.41	0.013	0.26		0.0561	0.0914	0.299
rs3819024	6:52050786	G/A	IL17A	0.98	0.027	0.09	0.13		0.964	0.318	0.611
rs2275913	6:52051033	A/G	IL17A	0.25	0.041	0.45	0.029		0.982	0.627	0.935
rs1322178	6:106631780	T/C	ATG5	0.06	0.07	0.011	0.76		0.587	0.483	0.889
rs3804329	6:106686427	G/A	ATG5	0.15	0.06	0.02	0.98		0.662	0.599	0.911
rs510432	6:106774030	C/T	ATG5	0.048	0.21	0.026	0.43		0.554	0.758	0.344
rs10953165	7:95507302	T/G	DYNC1I1	0.88	0.037	0.15	0.14		0.0785	0.511	0.127
rs13232349	7:95529945	C/T	DYNC1I1	0.97	0.039	0.16	0.14		0.506	0.997	0.647
rs12006123	9:32456017	A/G	RIG-I	0.28	0.046	0.042	0.48		0.371	0.0223	0.194
rs290988	9:93562955	G/C	SYK	0.39	0.001	0.004	0.1		0.875	0.653	0.353
rs290986	9:93563536	G/A	SYK	0.34	0.11	0.047	0.75		0.261	0.717	0.158
rs2227562	10:75672961	A/G	PLAU	0.09	0.14	0.91	0.015		0.00405	0.0283	0.0703
rs4065	10:75676464	T/C	PLAU	0.15	0.25	0.88	0.036		0.249	0.386	0.969
rs3740689	11:47380593	A/G	SPI1	0.42	0.06	0.042	0.43		0.545	0.851	0.662
rs10838698	11:47385923	A/G	SPI1	0.95	0.047	0.14	0.11		0.411	0.875	0.388
rs896816	11:47394338	C/T	SPI1	0.81	0.04	0.07	0.16		0.534	0.984	0.481
rs1051052	14:94843932	G/A	SERPINA1	0.023	0.23	0.014	0.43		0.937	0.849	0.983
rs6498011	16:27331894	G/A	IL4R	0.14	0.14	0.035	0.98		0.377	0.0956	0.976
rs3024676	16:27373558	A/C	IL4R	0.23	0.049	0.027	0.59		0.995	0.08	0.113
rs1805011	16:27373872	C/A	IL4R	0.71	0.046	0.33	0.07		0.437	0.229	0.0194
[1] Mersha, T.B. et al. Genomic architecture of asthma differs by sex. Genomics 2015, 106, 15–22, doi: 10.1016/j.ygeno.2015.03.003.

## Sheet: Table_S6
Table S6. Replication of findings from Myers et al. [1] for associated variants with asthma susceptibility
rsID	Chr:pos a	Closest gene	A1/A2	OR (95% CI) original study	p-value original study	Pop original study	OR (95% CI) interaction	p-value interaction	OR (95% CI) female	p-value female	OR (95% CI) male	p-value male
rs4673659	2:213189729	ERBB4	C/A	1.42 (1.23 - 1.64)	9.29e-07	Latino females	1.15 (0.95 - 1.38)	0.0793	1.00 (0.90 - 1.11)	0.989	0.87 (0.78 - 0.98)	0.0241
rs2549003	5:131829297	IRF1	G/A	1.33 (1.18 - 1.5)	8.9e-07	European males	1.00 (0.86 - 1.17)	0.975	1.03 (0.93 - 1.15)	0.625	1.03 (0.92 - 1.15)	0.648
rs2675724	6:165565895	C6orf118	A/C	1.44 (1.26 - 1.65)	1.58e-07	Latino females	0.92 (0.79 - 1.07)	0.313	1.00 (0.89 - 1.13)	0.993	1.15 (0.91 - 1.46)	0.131
rs9895098	17:2938533	RAP1GAP2	C/T	2.31 (1.9 - 2.81)	2.79e-07	Latino females	1.13 (0.91 - 1.40)	0.282	1.12 (0.96 - 1.30)	0.166	1.00 (0.86 - 1.17)	0.995
A1: effect allele; A2: non-effect allele; Chr: chromosome; CI: confidence interval; OR: odds ratio; p: p-value; pop: population; pos: position; Q: Cochran's Q; rsID: Reference SNP ID; SE: standard error
Statistically significant associations (p-value < 0.05) are highlighted in bold.
a Coordinates are referred to the GRCh37 reference genome.
[1] Myers, R. A. et al. Genome-wide interaction studies reveal sex-specific asthma risk alleles. Hum. Mol. Genet. 23, 5251–5259 (2014).

## Sheet: Table_S7
Table S7. List of proteins regulated by variant rs4593128 extracted from PhenoScanner [1].
rsid	hg19_coordinates	hg38_coordinates	A1	A2	Trait	efo	Study	PMID	Ancestry	Year	Beta	SE	p-value	n	Unit	Dataset
rs4593128	chr4:18221770	chr4:18220147	G	T	A disintegrin and metalloproteinase with thrombospondin motifs 1	EFO_0004747	Sun B	29875488	European	2017	-0.0878	0.0283	0.00191	3301	IVNT	Sun-B_pQTL_EUR_2017
rs4593128	chr4:18221770	chr4:18220147	G	T	Alpha-1,3-mannosyl-glycoprotein 4-beta-N-acetylglucosaminyltransferase B	EFO_0004747	Sun B	29875488	European	2017	0.0747	0.0283	0.00813	3301	IVNT	Sun-B_pQTL_EUR_2017
rs4593128	chr4:18221770	chr4:18220147	G	T	Anaphase-promoting complex subunit 7	EFO_0004747	Sun B	29875488	European	2017	0.0734	0.0283	0.00955	3301	IVNT	Sun-B_pQTL_EUR_2017
rs4593128	chr4:18221770	chr4:18220147	G	T	Annexin A1	EFO_0004747	Sun B	29875488	European	2017	0.0769	0.0283	0.00661	3301	IVNT	Sun-B_pQTL_EUR_2017
rs4593128	chr4:18221770	chr4:18220147	G	T	Casein kinase I isoform gamma-2	EFO_0004747	Sun B	29875488	European	2017	0.0747	0.0283	0.00832	3301	IVNT	Sun-B_pQTL_EUR_2017
rs4593128	chr4:18221770	chr4:18220147	G	T	Colipase-like protein 2	EFO_0004747	Sun B	29875488	European	2017	-0.0856	0.0282	0.00245	3301	IVNT	Sun-B_pQTL_EUR_2017
rs4593128	chr4:18221770	chr4:18220147	G	T	Collectin-12	EFO_0004747	Sun B	29875488	European	2017	0.0757	0.0283	0.00741	3301	IVNT	Sun-B_pQTL_EUR_2017
rs4593128	chr4:18221770	chr4:18220147	G	T	Dual specificity protein phosphatase 15	EFO_0004747	Sun B	29875488	European	2017	0.0882	0.0283	0.00182	3301	IVNT	Sun-B_pQTL_EUR_2017
rs4593128	chr4:18221770	chr4:18220147	G	T	Erythroid membrane-associated protein	EFO_0004747	Sun B	29875488	European	2017	0.0823	0.0283	0.00355	3301	IVNT	Sun-B_pQTL_EUR_2017
rs4593128	chr4:18221770	chr4:18220147	G	T	Fibroblast growth factor 10	EFO_0004747	Sun B	29875488	European	2017	-0.076	0.0283	0.00724	3301	IVNT	Sun-B_pQTL_EUR_2017
rs4593128	chr4:18221770	chr4:18220147	G	T	Glucokinase regulatory protein	EFO_0004747	Sun B	29875488	European	2017	-0.0848	0.0283	0.00269	3301	IVNT	Sun-B_pQTL_EUR_2017
rs4593128	chr4:18221770	chr4:18220147	G	T	Glutamate receptor ionotropic, delta-2	EFO_0004747	Sun B	29875488	European	2017	-0.0804	0.0283	0.00447	3301	IVNT	Sun-B_pQTL_EUR_2017
rs4593128	chr4:18221770	chr4:18220147	G	T	Inhibin beta A chain:Inhibin beta B chain heterodimer	EFO_0004747	Sun B	29875488	European	2017	-0.0758	0.0283	0.00741	3301	IVNT	Sun-B_pQTL_EUR_2017
rs4593128	chr4:18221770	chr4:18220147	G	T	Intercellular adhesion molecule 3	EFO_0004747	Sun B	29875488	European	2017	-0.0898	0.0283	0.00148	3301	IVNT	Sun-B_pQTL_EUR_2017
rs4593128	chr4:18221770	chr4:18220147	G	T	Interferon lambda-1	EFO_0004747	Sun B	29875488	European	2017	-0.0773	0.0283	0.00617	3301	IVNT	Sun-B_pQTL_EUR_2017
rs4593128	chr4:18221770	chr4:18220147	G	T	Interleukin-18 receptor 1	EFO_0004747	Sun B	29875488	European	2017	0.0754	0.0283	0.00759	3301	IVNT	Sun-B_pQTL_EUR_2017
rs4593128	chr4:18221770	chr4:18220147	G	T	Malonyl-CoA decarboxylase, mitochondrial	EFO_0004747	Sun B	29875488	European	2017	-0.0757	0.0283	0.00741	3301	IVNT	Sun-B_pQTL_EUR_2017
rs4593128	chr4:18221770	chr4:18220147	G	T	Mitochondrial glutamate carrier 2	EFO_0004747	Sun B	29875488	European	2017	-0.0743	0.0283	0.00871	3301	IVNT	Sun-B_pQTL_EUR_2017
rs4593128	chr4:18221770	chr4:18220147	G	T	Mitochondrial import inner membrane translocase subunit TIM14	EFO_0004747	Sun B	29875488	European	2017	-0.0778	0.0283	0.00589	3301	IVNT	Sun-B_pQTL_EUR_2017
rs4593128	chr4:18221770	chr4:18220147	G	T	Non-histone chromosomal protein HMG-14	EFO_0004747	Sun B	29875488	European	2017	0.1044	0.0283	0.000219	3301	IVNT	Sun-B_pQTL_EUR_2017
rs4593128	chr4:18221770	chr4:18220147	G	T	Poly [ADP-ribose] polymerase 1	EFO_0004747	Sun B	29875488	European	2017	-0.0936	0.0283	0.000933	3301	IVNT	Sun-B_pQTL_EUR_2017
rs4593128	chr4:18221770	chr4:18220147	G	T	Prokineticin-1	EFO_0004747	Sun B	29875488	European	2017	-0.0862	0.0283	0.00229	3301	IVNT	Sun-B_pQTL_EUR_2017
rs4593128	chr4:18221770	chr4:18220147	G	T	Protein deglycase DJ-1	EFO_0004747	Sun B	29875488	European	2017	0.0734	0.0283	0.00955	3301	IVNT	Sun-B_pQTL_EUR_2017
rs4593128	chr4:18221770	chr4:18220147	G	T	Protein turtle homolog A	EFO_0004747	Sun B	29875488	European	2017	-0.0892	0.0283	0.00158	3301	IVNT	Sun-B_pQTL_EUR_2017
rs4593128	chr4:18221770	chr4:18220147	G	T	Protocadherin alpha-4	EFO_0004747	Sun B	29875488	European	2017	-0.0837	0.0283	0.00309	3301	IVNT	Sun-B_pQTL_EUR_2017
rs4593128	chr4:18221770	chr4:18220147	G	T	Scavenger receptor class A member 5	EFO_0004747	Sun B	29875488	European	2017	-0.1036	0.0282	0.000245	3301	IVNT	Sun-B_pQTL_EUR_2017
rs4593128	chr4:18221770	chr4:18220147	G	T	Semaphorin-4C	EFO_0004747	Sun B	29875488	European	2017	0.0794	0.0283	0.0049	3301	IVNT	Sun-B_pQTL_EUR_2017
rs4593128	chr4:18221770	chr4:18220147	G	T	Thymic stromal lymphopoietin	EFO_0004747	Sun B	29875488	European	2017	-0.0803	0.0283	0.00447	3301	IVNT	Sun-B_pQTL_EUR_2017
rs4593128	chr4:18221770	chr4:18220147	G	T	Transformer-2 protein homolog beta	EFO_0004747	Sun B	29875488	European	2017	0.0735	0.0283	0.00933	3301	IVNT	Sun-B_pQTL_EUR_2017
rs4593128	chr4:18221770	chr4:18220147	G	T	Transforming growth factor beta-1-induced transcript 1 protein	EFO_0004747	Sun B	29875488	European	2017	-0.0754	0.0283	0.00776	3301	IVNT	Sun-B_pQTL_EUR_2017
rs4593128	chr4:18221770	chr4:18220147	G	T	Transgelin	EFO_0004747	Sun B	29875488	European	2017	-0.0754	0.0283	0.00776	3301	IVNT	Sun-B_pQTL_EUR_2017
rs4593128	chr4:18221770	chr4:18220147	G	T	Tumor necrosis factor ligand superfamily member 4	EFO_0004747	Sun B	29875488	European	2017	-0.0847	0.0283	0.00269	3301	IVNT	Sun-B_pQTL_EUR_2017
rs4593128	chr4:18221770	chr4:18220147	G	T	Tumor necrosis factor receptor superfamily member 27	EFO_0004747	Sun B	29875488	European	2017	-0.086	0.0283	0.00234	3301	IVNT	Sun-B_pQTL_EUR_2017
rs4593128	chr4:18221770	chr4:18220147	G	T	Tyrosine-protein kinase ZAP-70	EFO_0004747	Sun B	29875488	European	2017	-0.0809	0.0283	0.00417	3301	IVNT	Sun-B_pQTL_EUR_2017
rs4593128	chr4:18221770	chr4:18220147	G	T	WAP, Kazal, immunoglobulin, Kunitz and NTR domain-containing protein 2	EFO_0004747	Sun B	29875488	European	2017	-0.0896	0.0283	0.00151	3301	IVNT	Sun-B_pQTL_EUR_2017
A1: effect allele; A2: non-effect allele; PMID: PubMed ID; SE: standard error
[1] Kamat, M. A. et al. PhenoScanner V2: An expanded tool for searching human genotype-phenotype associations. Bioinformatics 35, 4851–4853 (2019).
